# Supplementary material for: Repeated ketamine anesthesia during neurodevelopment upregulates hippocampal activity and enhances drug reward in male mice
Source: PubMed Central journal article supplement (PMC9287305; doi:10.1038/s42003-022-03667-4), 2022-07-15
Supplement: 42003_2022_3667_MOESM2_ESM.pdf [file 42003_2022_3667_MOESM2_ESM.pdf]

## Supplementary information

Repeated ketamine anesthesia during neurodevelopment upregulates hippocampal activity and enhances drug reward in male mice

File contains:

1. Supplementary Figures
2. Supplementary Tables
3. Supplementary Notes

**Supplementary figures**  
**(Supplementary Figure 1-10)**

# Supplementary Figure 1

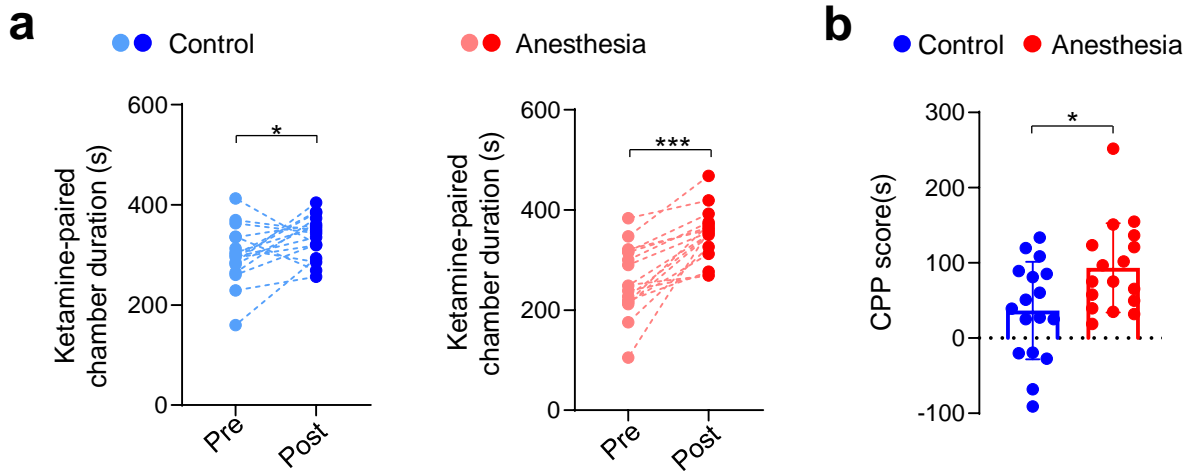

**Supplementary Figure 1: Conditioned place preference (CPP) test was repeated to confirm enhanced place preference to low-dose ketamine in young mice that received early ketamine anesthesia.** Place preference to low-dose ketamine ( $20 \text{ mg}\cdot\text{kg}^{-1}$ , i.p.) was measured 1 week after ketamine anesthesia injections. **a** Time spent in the ketamine-paired chamber was significantly increased after conditioning in both groups (Control,  $p = 0.034$ ; paired t-test;  $n = 17$  mice; Anesthesia,  $p < 0.001$ ; paired t-test;  $n = 17$  mice). **b** Summary graph comparing ketamine-CPP scores between groups ( $p = 0.012$ , Student's t-test; Control,  $n = 17$  mice; Anesthesia,  $n = 17$  mice). Values are presented as means  $\pm$  SD (\* $p < 0.05$ , \*\*\* $p < 0.001$ ).

# Supplementary Figure 2

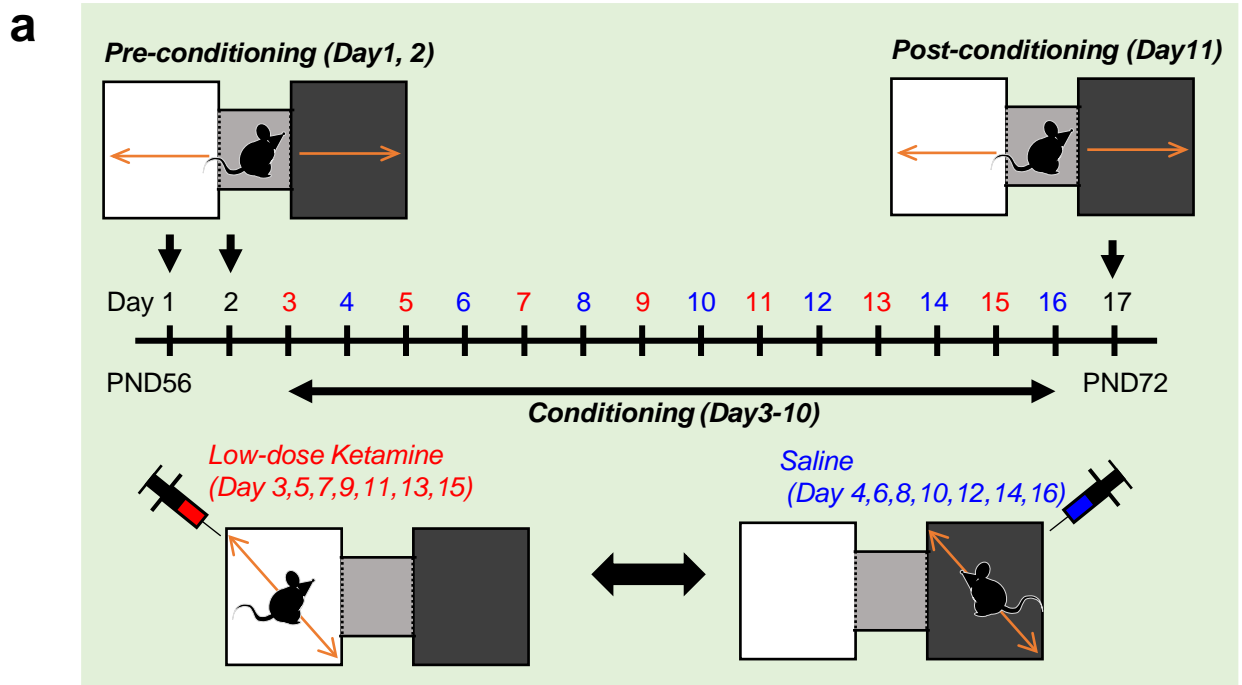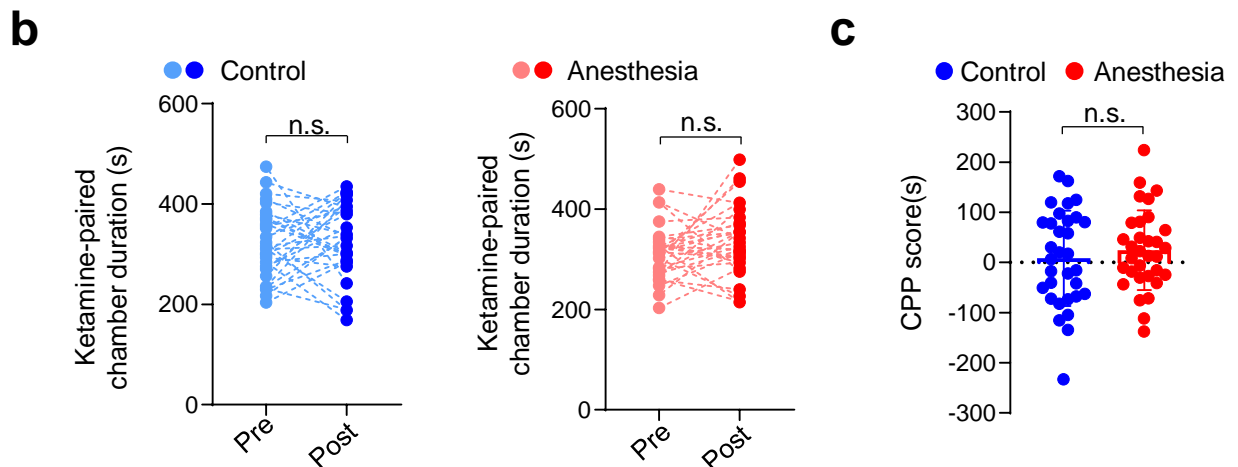

**Supplementary Figure 2: Place preference to low-dose ketamine does not develop after a 14-day conditioning period in adult male mice.**

**a** Experimental scheme of conditioned place preference test with low dose ketamine in adult mice (14-day conditioning). **b** Place preference to low-dose ketamine did not develop in both groups (paired t-test, Control  $p = 0.620$ ; Anesthesia  $p = 0.091$ ; Control  $n = 32$  mice, Anesthesia  $n = 32$  mice). **c** Summary bar graph of ketamine-CPP scores in adult male mice (Student's t-test,  $p = 0.465$ ; Control  $n = 32$  mice, Anesthesia  $n = 32$  mice). Values are presented as means  $\pm$  SD. n.s. = not significant.

# Supplementary Figure 3

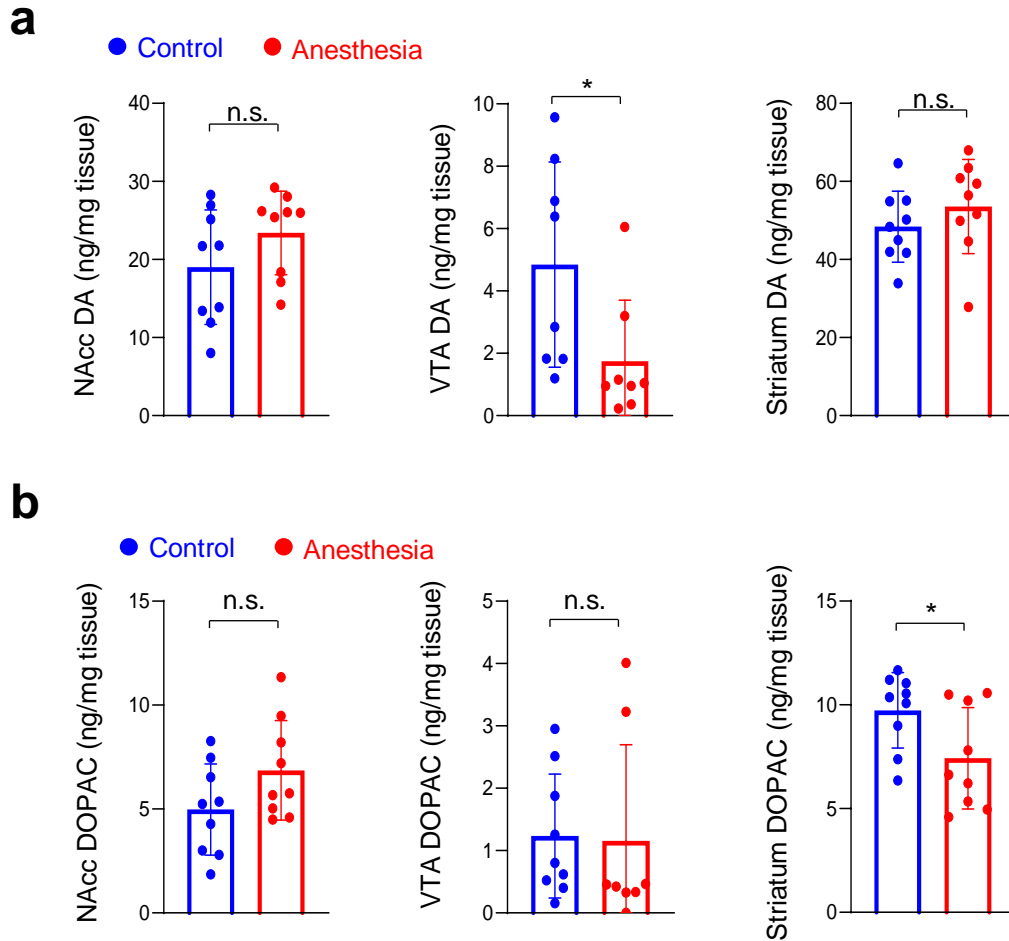

## Supplementary Figure 3: The level of dopamine and its metabolite (DOPAC) in the NAcc, VTA, and striatum was not increased after the ketamine-CPP test.

The level of dopamine (DA) and its metabolite, 3,4-dihydroxyphenylacetic acid (DOPAC), were evaluated in the nucleus accumbens (NAcc), ventral tegmental area (VTA), and striatum by high-performance liquid chromatography (HPLC). HPLC was performed 1 day after the ketamine-CPP test at postnatal day 39 in male. **a**, **b**  $n = 9$  mice per group (VTA DA  $n = 8$  mice per group; VTA DOPAC, Control  $n = 9$ , Anesthesia  $n = 8$ ) (Kruskal Wallis test & Student's *t*-test). Values are presented as means  $\pm$  SD. n.s. = not significant; \* $p < 0.05$ .

# Supplementary Figure 4

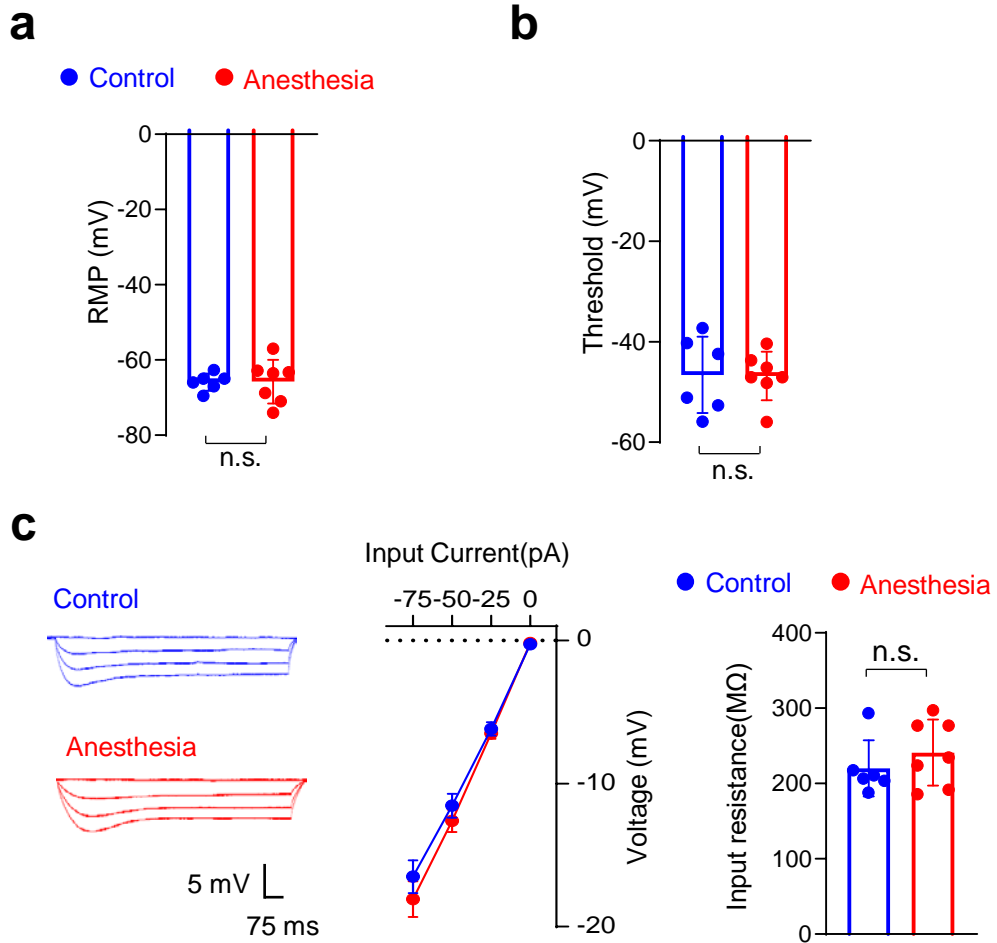

## Supplementary Figure 4: Repeated ketamine anesthesia does not affect resting membrane potential (RMP), action potential firing thresholds, and input resistance in male mice.

Repeated ketamine anesthesia did not affect **a** Resting membrane potential (RMP) (Student's t-test,  $p = 0.968$ ), **b** Action potential threshold (Student's t-test,  $p = 0.959$ ), and **c** Input resistance (Student's t-test,  $p = 0.377$ ). Control,  $n = 6$  mice [total 20 cells]; Anesthesia,  $n = 7$  mice [total 20 cells]. Values are presented as means  $\pm$  SD. n.s. = not significant.

# Supplementary Figure 5

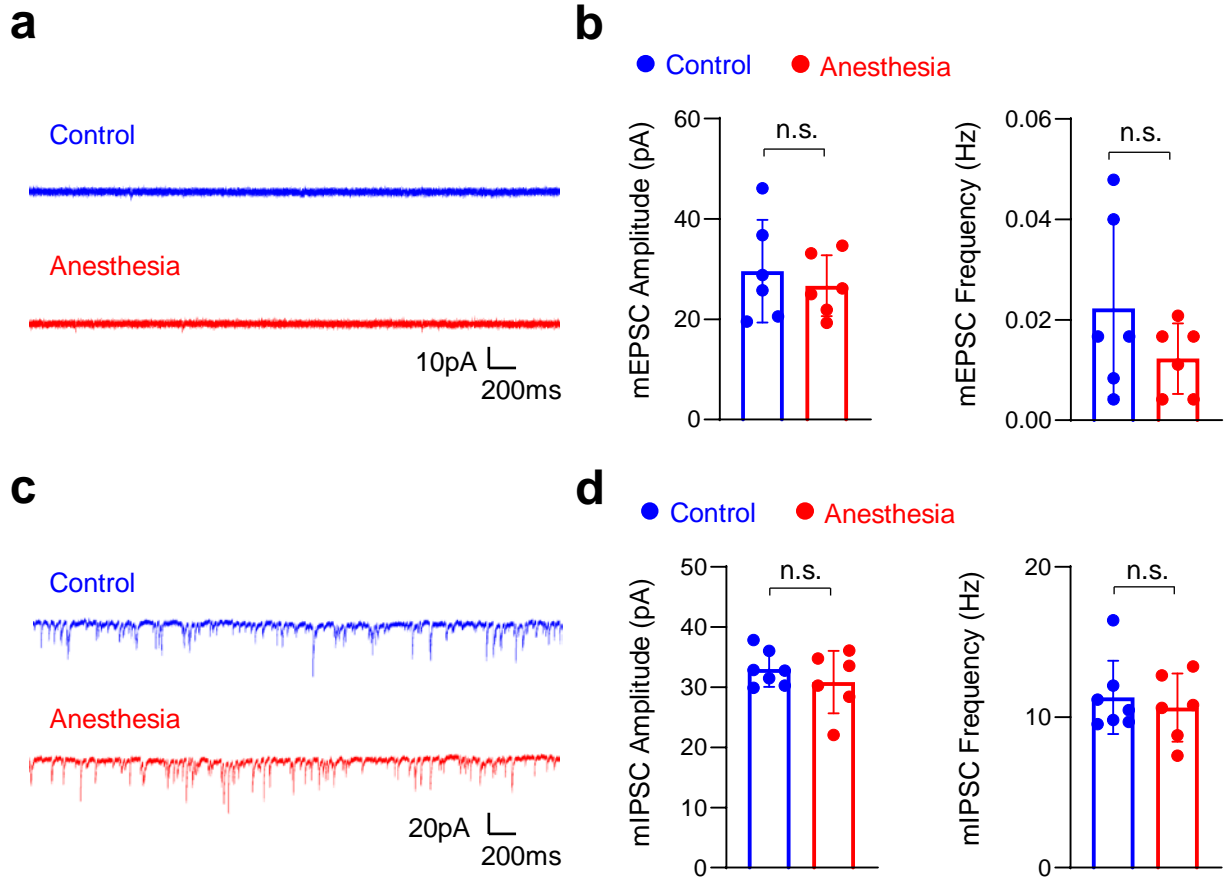

## Supplementary Figure 5: Repeated ketamine anesthesia does not affect miniature excitatory/inhibitory synaptic transmission (mEPSC/mIPSC) in hippocampal CA1 pyramidal neurons male mice.

mEPSCs/mIPSCs were measured 1 week after repeated saline injections (14 ml/kg, control group) or ketamine anesthesia (35 mg/kg, Anesthesia group). **a** Example of mEPSCs **b** Repeated ketamine anesthesia did not affect the amplitude (Student's t-test,  $p = 0.564$ ) and frequency (Student's t-test,  $p = 0.225$ ) of mEPSCs (Control  $n = 6$  mice [total 21 cells]; Anesthesia  $n = 6$  mice [total 21 cells]). **c** Example of mIPSCs **d** Repeated ketamine anesthesia did not affect the amplitude (Student's t-test,  $p = 0.364$ ) and frequency (Student's t-test,  $p = 0.613$ ) of mIPSCs (Control  $n = 7$  mice [total 23 cells]; Anesthesia  $n = 6$  mice [total 22 cells]). Values are presented as means  $\pm$  SD. n.s. = not significant.

# Supplementary Figure 6

## Female

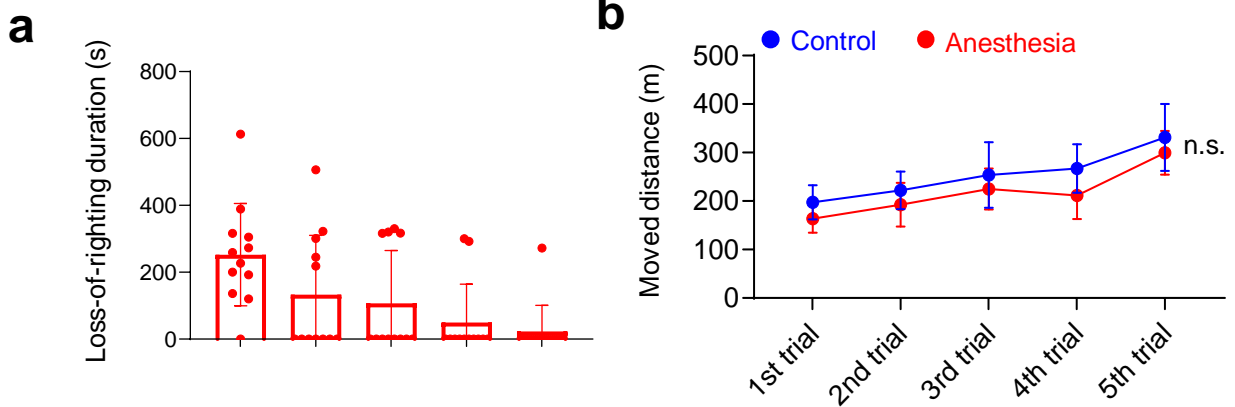

**Supplementary Figure 6: Early repeated ketamine exposures induce tolerance in female mice but do not affect behavioral sensitization.**

**a** PND16 mice were injected with ketamine for 5 consecutive days. The duration of ketamine anesthesia, measured as the LOR reflex duration, was significantly reduced by repeated injections (acute tolerance) ( $p = 0.006$ , RM-ANOVA;  $n = 12$ ). **b** Early repeated ketamine anesthesia does not affect low-dose ketamine-induced behavioral sensitization in female mice ( $p = 0.700$ , RM-ANOVA;  $n = 12$  mice/group). Values are presented as means  $\pm$  SD. n.s. = not significant.



# Supplementary Figure 7

## Female

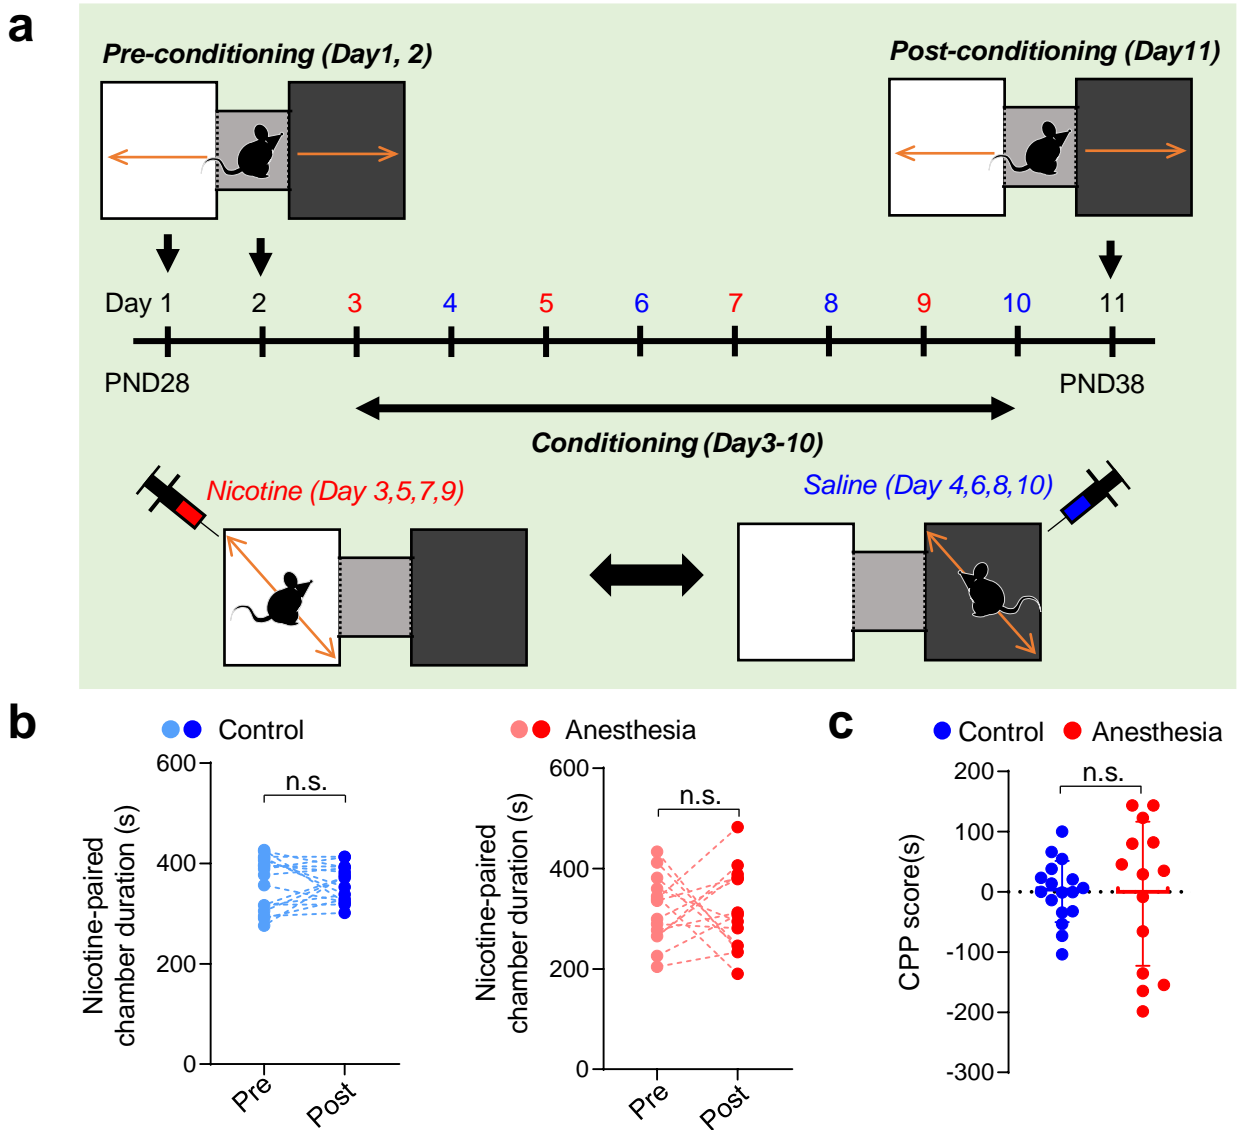

### Supplementary Figure 7: Repeated subcutaneous nicotine injections do not induce place preference in late postnatal female mice.

**a** Early repeated ketamine anesthesia does not affect nicotine-CPP in female mice (0.5 mg/kg, s.c.) **b** The time spent in the nicotine-paired (white) chamber was not increased after conditioning in either the Control ( $p = 0.946$ ) or Anesthesia ( $p = 0.921$ ) group (paired t-test; Control,  $n = 17$ ; Anesthesia,  $n = 14$ ). **c** Summary bar graph showing nicotine-CPP scores in female mice ( $p = 0.912$ , Welch ANOVA; Control,  $n = 17$  mice; Anesthesia,  $n = 14$  mice). Values are presented as means  $\pm$  SD (n.s., not significant).

# Supplementary Figure 8

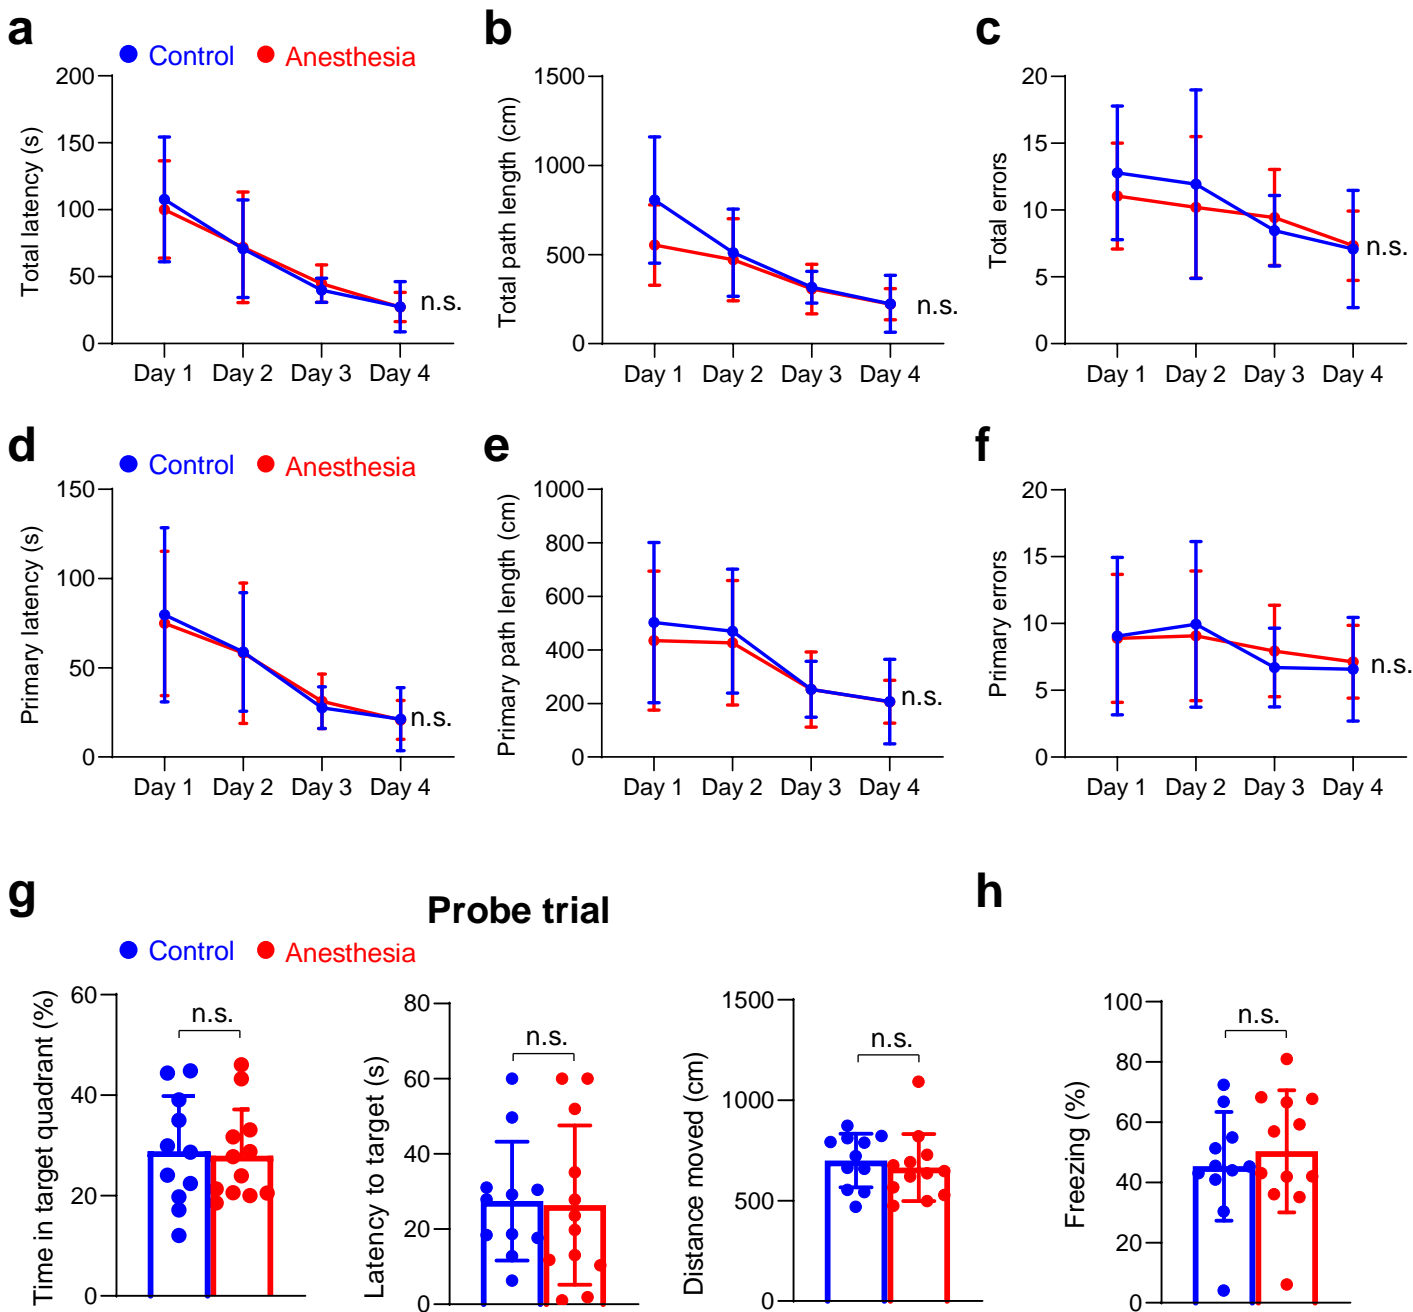

**Supplementary Figure 8: Early repeated ketamine anesthesia in female mice did not affect non-drug associated contextual learning and memory in the Barnes maze and fear chamber test.**

**a-g** Early repeated ketamine anesthesia did not affect contextual learning and memory in the Barnes maze test (Control  $n = 11$  mice, Anesthesia  $n = 12$  mice). **a-c** Total latency ( $p = 0.244$ , RM-ANOVA), total path length ( $p = 0.723$ , RM-ANOVA), and total number of errors ( $p = 0.442$ , RM-ANOVA) for mice to enter the escape box were comparable between groups. **d-f** Primary latency ( $p = 0.900$ , RM-ANOVA), primary path length ( $p = 0.736$ , RM-ANOVA), and primary errors ( $p = 0.902$ , RM-ANOVA) to the first encounter of the escape hole were comparable between groups. **g** The results of time in target quadrant ( $p = 0.834$ , Student's t-test), latency to target ( $p = 0.666$ , Kruskal-Wallis test) and distance moved ( $p = 0.591$ , Student's t-test) during the probe trial were comparable between groups. **h** Early repeated ketamine anesthesia did not affect contextual fear memory ( $p = 0.542$ , Student's t-test, control  $n = 11$  mice, anesthesia  $n = 12$  mice). Values are presented as means  $\pm$  SD (n.s., not significant).

# Supplementary Figure 9

## Female

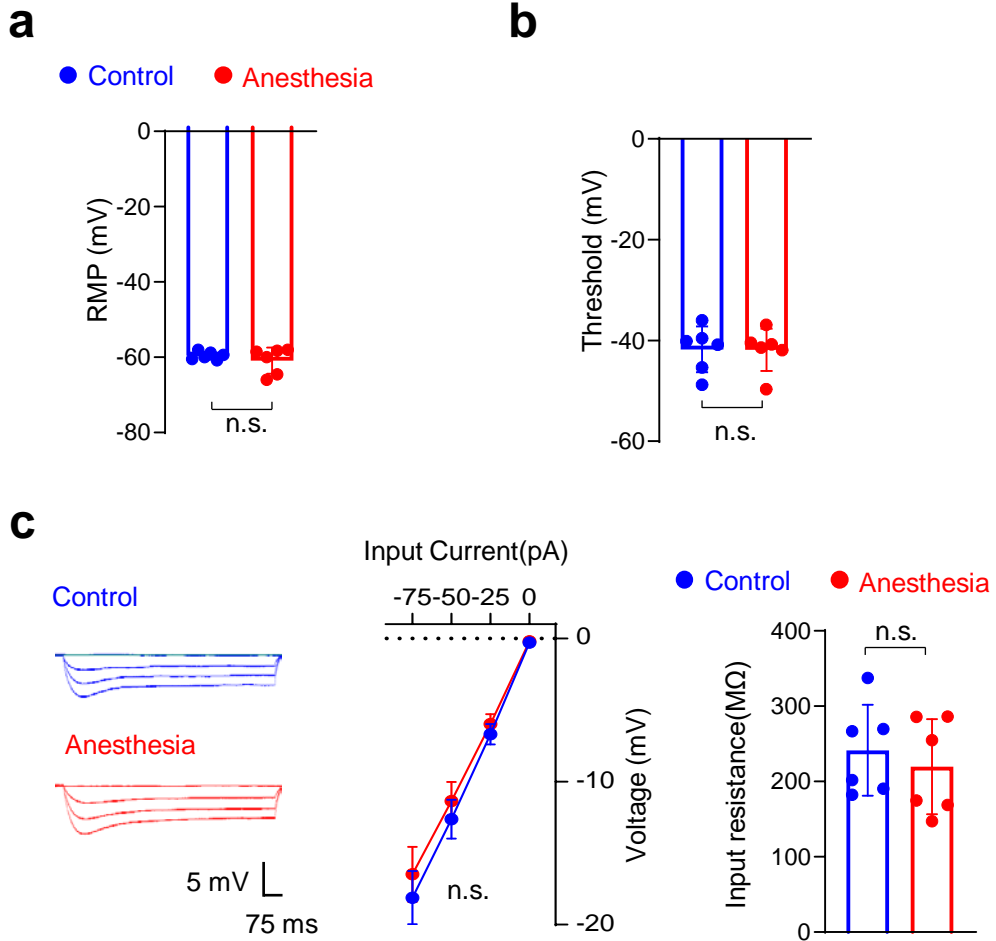

### Supplementary Figure 9: Repeated ketamine anesthesia does not affect resting membrane potential (RMP), action potential firing thresholds, and input resistance in female mice.

Repeated ketamine anesthesia did not affect **a** Resting membrane potential (RMP) (Welch ANOVA,  $p = 0.417$ ), **b** Action potential threshold (Student's t-test,  $p = 0.975$ ), and **c** Input resistance (Student's t-test,  $p = 0.555$ ) (Control  $n = 6$  mice [total 20 cells]; Anesthesia  $n = 6$  mice [total 21 cells]). Values are presented as means  $\pm$  SD. n.s. = not significant.

# Supplementary Figure 10

## Female

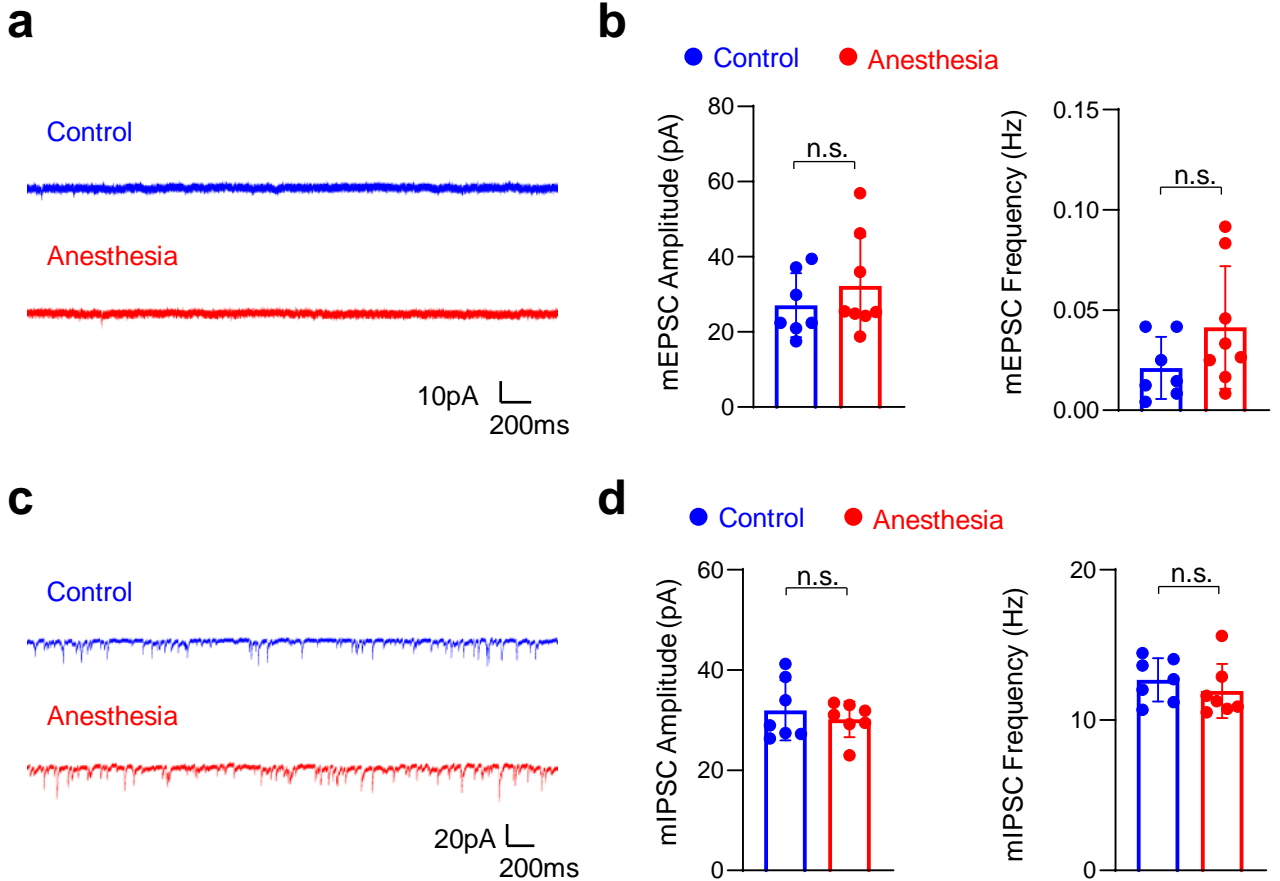

**Supplementary Figure 10: Repeated ketamine anesthesia does not affect miniature excitatory/inhibitory synaptic transmission (mEPSC/mIPSC) in hippocampal CA1 pyramidal neurons in late postnatal female mice.**

mEPSCs/mIPSCs were measured 1 week after repeated saline injections (14 ml/kg, Control group) or ketamine anesthesia (35 mg/kg, Anesthesia group). **a** Example of mEPSCs. **b** Repeated ketamine anesthesia did not affect the amplitude (Student's t-test,  $p = 0.396$ ) and frequency (Student's t-test,  $p = 0.140$ ) of mEPSCs (Control  $n = 7$  mice [total 22 cells]; Anesthesia  $n = 8$  mice [total 21 cells]). **c** Example of mIPSCs. **d** Repeated ketamine anesthesia did not affect the amplitude (Student's t-test,  $p = 0.506$ ) and frequency (Student's t-test,  $p = 0.410$ ) of mIPSCs (Control  $n = 7$  mice [total 21 cells]; Anesthesia  $n = 7$  mice [total 22 cells]). Values are presented as means  $\pm$  SD. n.s. = not significant.

**Supplementary tables**  
**(Supplementary Table 1-11)**

# Supplementary Table 1

**Supplementary Table 1: Summary of RNA-Seq mapping results.** Raw reads were mapped to the *Mus musculus* genome using HISAT2.

|   | Sample ID | Total Reads | Mapped Reads | Unmapped Reads | Mapping Rate % |
|---|-----------|-------------|--------------|----------------|----------------|
|   | K1-1      | 85,412,446  | 83,415,348   | 1,997,098      | 97.66          |
| 2 | K2-1      | 77,017,482  | 75,396,088   | 1,621,394      | 97.89          |
| 3 | K3-1      | 79,810,698  | 77,978,999   | 1,831,699      | 97.7           |
| 4 | K4-1      | 76,976,782  | 75,209,308   | 1,767,474      | 97.7           |
| 5 | S1-1      | 83,926,934  | 82,050,301   | 1,876,633      | 97.76          |
| 6 | S2-1      | 89,503,340  | 87,662,414   | 1,840,926      | 97.94          |
| 7 | S3-1      | 64,561,238  | 63,062,154   | 1,499,084      | 97.68          |
| 8 | S4-1      | 77,762,164  | 75,875,467   | 1,886,697      | 97.57          |

# Supplementary Table 2

## Supplementary Table 2: Differential expression analysis between Control and Anesthesia group.

38 differentially expressed genes were identified using DESeq2 with pairwise comparison.

|    | HGNC symbol | Full name                                               | baseMean  | FC    | p-value  | adjusted p-value | direction |
|----|-------------|---------------------------------------------------------|-----------|-------|----------|------------------|-----------|
| 1  | MAP1A       | microtubule associated protein 1A                       | 12,665.97 | 1.58  | 3.40E-09 | 2.07E-05         | up        |
| 2  | SZT2        | SZT2, KICSTOR complex subunit                           | 742.55    | 1.67  | 4.17E-09 | 2.07E-05         | up        |
| 3  | WDR90       | WD repeat domain 90                                     | 395.83    | 1.62  | 3.09E-08 | 1.02E-04         | up        |
| 4  | DOT1L       | DOT1 like histone lysine methyltransferase              | 360.11    | 1.48  | 3.91E-07 | 9.69E-04         | up        |
| 5  | SRGAP3      | SLIT-ROBO Rho GTPase activating protein 3               | 4,312.37  | 1.31  | 1.44E-06 | 2.83E-03         | up        |
| 6  | SCN8A       | sodium voltage-gated channel alpha subunit 8            | 8,531.85  | 1.2   | 1.72E-06 | 2.83E-03         | up        |
| 7  | MIAT        | myocardial infarction associated transcript             | 8,420.01  | 1.39  | 2.33E-06 | 3.30E-03         | up        |
| 8  | ZFX2        | zinc finger homeobox 2                                  | 618.19    | 1.39  | 3.11E-06 | 3.86E-03         | up        |
| 9  | ZMYND8      | zinc finger MYND-type containing 8                      | 1,787.08  | 1.24  | 4.15E-06 | 4.57E-03         | up        |
| 10 | HDAC4       | histone deacetylase 4                                   | 1,384.19  | 1.24  | 6.50E-06 | 6.44E-03         | up        |
| 11 | CBX6        | chromobox 6                                             | 5,129.30  | 1.22  | 7.41E-06 | 6.68E-03         | up        |
| 12 | TUBGCP6     | tubulin gamma complex associated protein 6              | 945.44    | 1.29  | 9.32E-06 | 7.70E-03         | up        |
| 13 | PPFIA3      | PTPRF interacting protein alpha 3                       | 1,754.01  | 1.2   | 1.39E-05 | 1.06E-02         | up        |
| 14 | MAPKBP1     | mitogen-activated protein kinase binding protein 1      | 897.44    | 1.33  | 1.78E-05 | 1.16E-02         | up        |
| 15 | NAV2        | neuron navigator 2                                      | 1,526.25  | 1.35  | 1.81E-05 | 1.16E-02         | up        |
| 16 | NEURL1B     | neurulized E3 ubiquitin protein ligase 1B               | 861.73    | 1.43  | 1.87E-05 | 1.16E-02         | up        |
| 17 | PGPEP1      | pyroglutamy-peptidase 1                                 | 283.78    | -1.89 | 2.36E-05 | 1.38E-02         | down      |
| 18 | NAV1        | neuron navigator 1                                      | 2,066.97  | 1.26  | 2.88E-05 | 1.59E-02         | up        |
| 19 | SRRM2       | serine/arginine repetitive matrix 2                     | 5,877.69  | 1.29  | 3.19E-05 | 1.66E-02         | up        |
| 20 | KCNQ2       | potassium voltage-gated channel subfamily Q member 2    | 7,476.03  | 1.2   | 4.74E-05 | 2.35E-02         | up        |
| 21 | TOP2B       | DNA topoisomerase II beta                               | 4,060.62  | -1.17 | 7.00E-05 | 3.15E-02         | down      |
| 22 | PRRC2B      | proline rich coiled-coil 2B                             | 5,377.15  | 1.38  | 7.51E-05 | 3.23E-02         | up        |
| 23 | LRP1        | LDL receptor related protein 1                          | 12,239.16 | 1.24  | 8.50E-05 | 3.51E-02         | up        |
| 24 | PCSK1N      | proprotein convertase subtilisin/kexin type 1 inhibitor | 778.08    | 1.32  | 1.03E-04 | 4.08E-02         | up        |
| 25 | NISCH       | nischarin                                               | 5,128.98  | 1.15  | 1.14E-04 | 4.16E-02         | up        |
| 26 | PRRC2A      | proline rich coiled-coil 2A                             | 1,286.28  | 1.3   | 1.17E-04 | 4.16E-02         | up        |
| 27 | CHPF2       | chondroitin polymerizing factor 2                       | 1,640.00  | 1.28  | 1.17E-04 | 4.16E-02         | up        |
| 28 | PHLDB2      | pleckstrin homology like domain family B member 2       | 256.98    | -1.6  | 1.30E-04 | 4.44E-02         | down      |
| 29 | TMEM184B    | transmembrane protein 184B                              | 245.78    | 1.62  | 1.41E-04 | 4.67E-02         | up        |
| 30 | PLEC        | plectin                                                 | 3,828.15  | 1.37  | 1.51E-04 | 4.72E-02         | up        |
| 31 | CERS4       | ceramide synthase 4                                     | 1,058.02  | 1.23  | 1.59E-04 | 4.72E-02         | up        |
| 32 | ABCA5       | ATP binding cassette subfamily A member 5               | 2,071.70  | -1.2  | 1.63E-04 | 4.72E-02         | down      |
| 33 | PTPN1       | protein tyrosine phosphatase, non-receptor type 1       | 595.82    | 1.23  | 1.71E-04 | 4.72E-02         | up        |
| 34 | ZNF236      | zinc finger protein 236                                 | 1,393.57  | 1.23  | 1.72E-04 | 4.72E-02         | up        |
| 35 | IQSEC3      | IQ motif and Sec7 domain 3                              | 1,758.34  | 1.23  | 1.93E-04 | 5.00E-02         | up        |
| 36 | PRRT3       | proline rich transmembrane protein 3                    | 673.65    | 1.31  | 1.93E-04 | 5.00E-02         | up        |
| 37 | SSH1        | slingshot protein phosphatase 1                         | 239.51    | 1.32  | 1.97E-04 | 5.00E-02         | up        |
| 38 | SRRT        | serrate, RNA effector molecule                          | 1,285.28  | 1.21  | 2.02E-04 | 5.00E-02         | up        |

# Supplementary Table 3

**Supplementary Table 3: Differential expression analysis was carried out using DESeq2 with pairwise comparison (Top 100).** Majority of gene changes were less than 2-fold at the single-gene level.

| Gene          | HGNC     | Ensembl ID          | baseMean    | log2FC      | FC          | p-value     | adjusted p- |
|---------------|----------|---------------------|-------------|-------------|-------------|-------------|-------------|
| Map1a         | MAP1A    | ENSMUSG00000027254  | 12665.97231 | 0.660721894 | 1.580873462 | 3.40E-09    | 0.000020679 |
| Szt2          | SZT2     | ENSMUSG00000033253  | 742.5537206 | 0.741792797 | 1.67225261  | 4.17E-09    | 0.000020679 |
| Wdr90         | WDR90    | ENSMUSG00000073434  | 395.8348409 | 0.698256313 | 1.622542551 | 3.09E-08    | 0.000102215 |
| Dot1l         | DOT1L    | ENSMUSG00000061589  | 360.1148716 | 0.565774626 | 1.48018205  | 3.91E-07    | 0.000969095 |
| Srgap3        | SRGAP3   | ENSMUSG00000030257  | 4312.371075 | 0.390736215 | 1.311062276 | 1.44E-06    | 0.002833377 |
| Scn8a         | SCN8A    | ENSMUSG00000023033  | 8531.853254 | 0.266591324 | 1.202962211 | 1.72E-06    | 0.002833377 |
| Miat          | MIAT     | ENSMUSG00000097767  | 8420.012448 | 0.477192144 | 1.392031776 | 2.33E-06    | 0.003304382 |
| Zfhx2         | ZFHX2    | ENSMUSG00000040721  | 618.1851095 | 0.473854476 | 1.38881504  | 3.11E-06    | 0.003858837 |
| Zmynd8        | ZMYND8   | ENSMUSG00000039671  | 1787.077686 | 0.312682931 | 1.242015287 | 4.15E-06    | 0.00457074  |
| Hdac4         | HDAC4    | ENSMUSG00000026313  | 1384.18703  | 0.305934093 | 1.236218785 | 6.50E-06    | 0.006440208 |
| Cbx6          | CBX6     | ENSMUSG00000089715  | 5129.296461 | 0.288177828 | 1.221097017 | 7.41E-06    | 0.006678353 |
| Tubgcp6       | TUBGCP6  | ENSMUSG00000051786  | 945.4398006 | 0.362060401 | 1.285260146 | 9.32E-06    | 0.007699383 |
| Ppfia3        | PPFIA3   | ENSMUSG00000030863  | 1754.01428  | 0.26755134  | 1.203762968 | 1.39E-05    | 0.010600519 |
| Mapkbp1       | MAPKBP1  | ENSMUSG00000033902  | 897.4414141 | 0.409608989 | 1.328325751 | 1.78E-05    | 0.011560003 |
| Nav2          | NAV2     | ENSMUSG00000052512  | 1526.250446 | 0.436147404 | 1.352986462 | 1.81E-05    | 0.011560003 |
| Neurl1b       | NEURL1B  | ENSMUSG00000034413  | 861.7304421 | 0.51122186  | 1.425256776 | 1.87E-05    | 0.011560003 |
| Pgpep1        | PGPEP1   | ENSMUSG00000056204  | 283.7798296 | -0.91756768 | -1.88892795 | 2.36E-05    | 0.013762294 |
| Nav1          | NAV1     | ENSMUSG00000009418  | 2066.966461 | 0.33606125  | 1.262305622 | 2.88E-05    | 0.015865098 |
| Srm2          | SRRM2    | ENSMUSG00000039218  | 5877.69434  | 0.36997812  | 1.292333231 | 3.19E-05    | 0.016633549 |
| Kcnq2         | KCNQ2    | ENSMUSG00000016346  | 7476.03238  | 0.261034526 | 1.1983377   | 4.74E-05    | 0.02350255  |
| Tspoap1       | NA       | ENSMUSG00000034156  | 3211.569189 | 0.315867309 | 1.244759744 | 5.33E-05    | 0.025139716 |
| Top2b         | TOP2B    | ENSMUSG00000017485  | 4060.616757 | -0.22444531 | -1.16832796 | 7.00E-05    | 0.031546514 |
| Prc2b         | PRRC2B   | ENSMUSG00000039262  | 5377.154237 | 0.464134765 | 1.379489776 | 7.51E-05    | 0.032346407 |
| Lrp1          | LRP1     | ENSMUSG00000040249  | 12239.1621  | 0.314073203 | 1.243212749 | 8.50E-05    | 0.035118586 |
| Pcsk1n        | PCSK1N   | ENSMUSG00000039278  | 778.0843823 | 0.395987273 | 1.315842917 | 0.000102954 | 0.040815133 |
| Nisch         | NISCH    | ENSMUSG00000021910  | 5128.983767 | 0.202742014 | 1.150883669 | 0.000114087 | 0.041575114 |
| Prc2a         | PRRC2A   | ENSMUSG00000024393  | 1286.279599 | 0.378173426 | 1.299695289 | 0.000117186 | 0.041575114 |
| Chpf2         | CHPF2    | ENSMUSG00000038181  | 1639.99892  | 0.354866215 | 1.278866983 | 0.000117456 | 0.041575114 |
| Phldb2        | PHLDB2   | ENSMUSG00000033149  | 256.9830424 | -0.67898278 | -1.60101051 | 0.000130039 | 0.044441825 |
| Tmem184b      | TMEM184  | ENSMUSG00000009035  | 245.780912  | 0.69565999  | 1.619625194 | 0.000141236 | 0.046659582 |
| Plec          | PLEC     | ENSMUSG00000022565  | 3828.154398 | 0.455397929 | 1.371160951 | 0.000151026 | 0.047232363 |
| Cers4         | CERS4    | ENSMUSG00000008206  | 1058.021529 | 0.301746826 | 1.232635995 | 0.000158645 | 0.047232363 |
| Abca5         | ABCA5    | ENSMUSG00000018800  | 2071.701074 | -0.26417806 | -1.20095164 | 0.000163027 | 0.047232363 |
| Gm42771       | NA       | ENSMUSG000000106579 | 444.0472856 | 0.462498981 | 1.377926543 | 0.000168777 | 0.047232363 |
| Ptpn1         | PTPN1    | ENSMUSG00000027540  | 595.8182854 | 0.294599358 | 1.226544314 | 0.000171107 | 0.047232363 |
| Zfp236        | ZNF236   | ENSMUSG00000041258  | 1393.56767  | 0.293241139 | 1.225390132 | 0.000171564 | 0.047232363 |
| Iqsec3        | IQSEC3   | ENSMUSG000000040797 | 1758.341552 | 0.298417268 | 1.229794507 | 0.000192556 | 0.049951829 |
| Prrt3         | PRRT3    | ENSMUSG00000045009  | 673.6530226 | 0.393394452 | 1.313480199 | 0.000192781 | 0.049951829 |
| Ssh1          | SSH1     | ENSMUSG00000042121  | 239.5139321 | 0.403654436 | 1.322854543 | 0.000196953 | 0.049951829 |
| Srrt          | SRRT     | ENSMUSG00000037364  | 1285.276769 | 0.279172275 | 1.213498457 | 0.000201602 | 0.049951829 |
| Marf1         | MARF1    | ENSMUSG000000060657 | 3485.459124 | 0.215659106 | 1.161234312 | 0.00022832  | 0.054162199 |
| Slc36a1       | SLC36A1  | ENSMUSG00000020261  | 619.1708971 | 0.491973161 | 1.406367036 | 0.000235439 | 0.054162199 |
| Dpysl5        | DPYSL5   | ENSMUSG00000029168  | 303.3220633 | 0.473209533 | 1.388194322 | 0.000247039 | 0.054162199 |
| Ppp1r12b      | PPP1R12B | ENSMUSG00000073557  | 2636.095738 | 0.295643177 | 1.227432065 | 0.000248451 | 0.054162199 |
| Adgrb2        | ADGRB2   | ENSMUSG00000028782  | 5081.931847 | 0.313374665 | 1.242610943 | 0.00025038  | 0.054162199 |
| Csmd2         | CSMD2    | ENSMUSG00000028804  | 1277.638798 | 0.390875537 | 1.311188892 | 0.000251383 | 0.054162199 |
| Gan           | GAN      | ENSMUSG00000052557  | 624.6311088 | 0.449383546 | 1.365456681 | 0.000263797 | 0.05562746  |
| Zfx           | ZFX      | ENSMUSG00000079509  | 1124.707212 | -0.29026776 | -1.22286722 | 0.000274843 | 0.056749279 |
| Plekham2      | PLEKHM2  | ENSMUSG00000028917  | 800.9076446 | 0.262359274 | 1.199438573 | 0.000286404 | 0.057925958 |
| Ppfia4        | PPFIA4   | ENSMUSG00000026458  | 1181.215663 | 0.258711762 | 1.196409907 | 0.000296775 | 0.058826658 |
| Sbf1          | SBF1     | ENSMUSG00000036529  | 4875.500541 | 0.395120541 | 1.315052632 | 0.000331256 | 0.06437408  |
| Tyh3          | TYH3     | ENSMUSG00000036565  | 760.512075  | 0.561352038 | 1.475651493 | 0.000357446 | 0.068127896 |
| D630045J12Rik | KIAA1549 | ENSMUSG00000063455  | 1055.003359 | 0.287010358 | 1.220109271 | 0.000372891 | 0.069730589 |
| Rapgef1       | RAPGEF1  | ENSMUSG00000039844  | 1056.352629 | 0.397745361 | 1.317447399 | 0.000404055 | 0.073770608 |
| Hspa5         | HSPA5    | ENSMUSG00000026864  | 4320.535778 | -0.30800416 | -1.23799386 | 0.000418257 | 0.073770608 |
| Zfp652        | ZNF652   | ENSMUSG00000075595  | 1489.217417 | 0.31264217  | 1.241980197 | 0.000423792 | 0.073770608 |
| Malsu1        | MALSU1   | ENSMUSG00000029815  | 349.5893421 | 0.414249108 | 1.332604904 | 0.000424268 | 0.073770608 |
| Ddx1          | DDX1     | ENSMUSG00000037149  | 2488.990903 | -0.22118095 | -1.16568739 | 0.000440125 | 0.074241704 |
| Atp8a2        | ATP8A2   | ENSMUSG00000021983  | 1314.674346 | 0.527933417 | 1.441862325 | 0.000441959 | 0.074241704 |
| Crtc1         | CRTC1    | ENSMUSG00000003575  | 758.679754  | 0.373898701 | 1.295849974 | 0.000459689 | 0.075933035 |
| Atp13a2       | ATP13A2  | ENSMUSG00000036622  | 2270.912643 | 0.199750389 | 1.148499628 | 0.000487563 | 0.079216969 |
| Rab11fip3     | RAB11FIP | ENSMUSG00000037098  | 1250.389118 | 0.280998643 | 1.215035649 | 0.000526467 | 0.084158261 |
| Actr6         | ACTR6    | ENSMUSG00000019948  | 366.9520732 | -0.39084694 | -1.3111629  | 0.000543681 | 0.085066287 |
| Bcl11a        | BCL11A   | ENSMUSG00000000861  | 1805.389264 | 0.268015822 | 1.204150587 | 0.000549313 | 0.085066287 |
| Dnmt3a        | DNMT3A   | ENSMUSG00000020661  | 2582.684713 | 0.40090916  | 1.320339703 | 0.000562432 | 0.085757958 |
| Gon4l         | GON4L    | ENSMUSG00000054199  | 1314.619639 | 0.250483792 | 1.18960597  | 0.000585317 | 0.086619966 |
| Hectd4        | NA       | ENSMUSG00000042744  | 8910.13598  | 0.288470173 | 1.221344483 | 0.000591447 | 0.086619966 |
| Dusp7         | DUSP7    | ENSMUSG00000053716  | 591.2369282 | 0.316433145 | 1.245248044 | 0.000594305 | 0.086619966 |
| Smg9          | SMG9     | ENSMUSG00000002210  | 301.9575774 | 0.350793534 | 1.275261874 | 0.000613848 | 0.088171707 |
| Soga1         | SOGA1    | ENSMUSG00000055485  | 1033.125844 | 0.393644055 | 1.313707466 | 0.000645288 | 0.09037316  |
| Myo18a        | MYO18A   | ENSMUSG000000006631 | 2428.517479 | 0.276634436 | 1.211366574 | 0.000655486 | 0.09037316  |
| Ccnyl1        | CCNYL1   | ENSMUSG00000070871  | 265.1978515 | 0.555982911 | 1.470169922 | 0.00065653  | 0.09037316  |
| Srcap         | SRCAP    | ENSMUSG00000053877  | 999.0405197 | 0.268312951 | 1.204398613 | 0.000668655 | 0.090781384 |
| Map1s         | MAP1S    | ENSMUSG00000019261  | 650.6413257 | 0.470927102 | 1.385999885 | 0.00068661  | 0.09120386  |
| Med13l        | MED13L   | ENSMUSG00000018076  | 2322.254861 | 0.280608484 | 1.214707102 | 0.000702343 | 0.09120386  |
| Kcnb1         | KCNB1    | ENSMUSG00000050556  | 3537.336573 | 0.471338265 | 1.386394912 | 0.00071262  | 0.09120386  |
| Phkb          | PHKB     | ENSMUSG00000036879  | 890.5537466 | -0.31643997 | -1.24525394 | 0.000713143 | 0.09120386  |
| Rapgef3       | RAPGEF3  | ENSMUSG00000022469  | 549.538955  | 0.274910264 | 1.20991883  | 0.000717778 | 0.09120386  |
| Adgrb1        | ADGRB1   | ENSMUSG00000034730  | 2239.478481 | 0.354086597 | 1.278176083 | 0.000771836 | 0.096831281 |
| Ubr4          | UBR4     | ENSMUSG00000066036  | 6994.026329 | 0.198294078 | 1.147340874 | 0.000802007 | 0.099358607 |
| Cacna1a       | CACNA1A  | ENSMUSG00000034656  | 1828.935772 | 0.45390828  | 1.369745895 | 0.000840746 | 0.102871961 |
| Arhgap35      | ARHGAP35 | ENSMUSG00000058230  | 4548.468917 | 0.16495838  | 1.121133734 | 0.000855742 | 0.103229998 |
| Fbxo31        | FBXO31   | ENSMUSG00000052934  | 1587.314624 | 0.279024874 | 1.21337448  | 0.000868527 | 0.103710519 |
| Crebbp        | CREBBP   | ENSMUSG00000022521  | 2354.837888 | 0.233553502 | 1.17572732  | 0.000879193 | 0.103734302 |
| Sipa1l1       | SIPA1L1  | ENSMUSG00000042700  | 5106.07045  | 0.262608475 | 1.199645773 | 0.000891706 | 0.10397297  |



|         |         |                    |             |             |             |             |             |
|---------|---------|--------------------|-------------|-------------|-------------|-------------|-------------|
| Gcn1    | GCN1    | ENSMUSG00000041638 | 2124.814031 | 0.230145127 | 1.172952936 | 0.000920132 | 0.106039902 |
| Mapk11  | MAPK11  | ENSMUSG00000053137 | 341.3816259 | 0.441721541 | 1.358224104 | 0.00094009  | 0.106365439 |
| Fam193b | FAM193B | ENSMUSG00000021495 | 1031.871415 | 0.291691916 | 1.224074967 | 0.000949943 | 0.106365439 |
| Ccdc85c | CCDC85C | ENSMUSG00000084883 | 694.0426375 | 0.269108426 | 1.205062878 | 0.000955153 | 0.106365439 |
| Denn2b  | NA      | ENSMUSG00000031024 | 273.4589087 | -0.48654202 | -1.40108261 | 0.000985488 | 0.108524153 |
| Adgr1   | ADGRL1  | ENSMUSG00000013033 | 6879.615383 | 0.384284201 | 1.30521204  | 0.000996832 | 0.108567055 |
| Kcnq5   | KCNQ5   | ENSMUSG00000028033 | 1974.765006 | 0.281897032 | 1.215792506 | 0.001013591 | 0.109192343 |
| Ralgapb | RALGAPB | ENSMUSG00000027652 | 3605.877901 | 0.218976104 | 1.163907256 | 0.001030101 | 0.109777731 |
| Neur1a  | NEURL1  | ENSMUSG00000006435 | 1484.843126 | 0.251189268 | 1.190187827 | 0.001085586 | 0.113785855 |
| Rbfox3  | RBFOX3  | ENSMUSG00000025576 | 930.4715509 | 0.299635069 | 1.230833034 | 0.001090673 | 0.113785855 |
| Sptbn4  | SPTBN4  | ENSMUSG00000011751 | 2543.399852 | 0.249168494 | 1.188521906 | 0.001140336 | 0.117727766 |
| Palm    | PALM    | ENSMUSG00000035863 | 1107.244605 | 0.24688313  | 1.186640666 | 0.001165799 | 0.11911581  |
| Wdfy3   | WDFY3   | ENSMUSG00000043940 | 7200.636565 | 0.205664219 | 1.153217168 | 0.001206517 | 0.12155176  |

# Supplementary Table 4

**Supplementary Table 4:** Functional enrichment analysis of differentially expression genes (DEGs) using Gene ontological term (GO) Molecular Function analysis.

| Term                                                                                                       | Overlap | P-value  | Adjusted P-value | Odds Ratio | Combine d Score | Genes                                            |
|------------------------------------------------------------------------------------------------------------|---------|----------|------------------|------------|-----------------|--------------------------------------------------|
| ankyrin binding (GO:0030506)                                                                               | 2/18    | 5.28E-04 | 0.607246         | 58.47953   | 441.3572        | KCNQ2;PLEC                                       |
| RNA binding (GO:0003723)                                                                                   | 8/1387  | 0.003942 | 1                | 3.035708   | 16.80575        | SRRM2;MAPKBP1;PTPN1;LRP1;SRRT;PRRC2B;PRRC2A;PLEC |
| repressing transcription factor binding (GO:0070491)                                                       | 2/53    | 0.004557 | 1                | 19.86097   | 107.0728        | HDAC4;ZMYND8                                     |
| clathrin heavy chain binding (GO:0032050)                                                                  | 1/6     | 0.011347 | 1                | 87.7193    | 392.8751        | LRP1                                             |
| sphingosine N-acyltransferase activity (GO:0050291)                                                        | 1/6     | 0.011347 | 1                | 87.7193    | 392.8751        | CERS4                                            |
| histone deacetylase binding (GO:0042826)                                                                   | 2/85    | 0.011364 | 1                | 12.3839    | 55.4466         | HDAC4;TOP2B                                      |
| microtubule minus-end binding (GO:0051011)                                                                 | 1/10    | 0.018842 | 1                | 52.63158   | 209.0339        | TUBGCP6                                          |
| cadherin binding (GO:0045296)                                                                              | 3/313   | 0.021386 | 1                | 5.04456    | 19.39634        | PTPN1;PHLDB2;PLEC                                |
| C2H2 zinc finger domain binding (GO:0070742)                                                               | 1/12    | 0.022569 | 1                | 43.85965   | 166.2793        | SRRM2                                            |
| potassium ion binding (GO:0030955)                                                                         | 1/12    | 0.022569 | 1                | 43.85965   | 166.2793        | HDAC4                                            |
| low-density lipoprotein receptor activity (GO:0005041)                                                     | 1/13    | 0.024427 | 1                | 40.48583   | 150.2853        | LRP1                                             |
| lipoprotein transporter activity (GO:0042954)                                                              | 1/14    | 0.026282 | 1                | 37.59398   | 136.7993        | LRP1                                             |
| phosphoprotein phosphatase activity (GO:0004721)                                                           | 2/136   | 0.027507 | 1                | 7.739938   | 27.8121         | PTPN1;SSH1                                       |
| lipoprotein particle receptor activity (GO:0030228)                                                        | 1/15    | 0.028134 | 1                | 35.08772   | 125.2909        | LRP1                                             |
| alkali metal ion binding (GO:0031420)                                                                      | 1/16    | 0.029982 | 1                | 32.89474   | 115.3676        | HDAC4                                            |
| lysine-acetylated histone binding (GO:0070577)                                                             | 1/18    | 0.033667 | 1                | 29.23977   | 99.15889        | ZMYND8                                           |
| acetylation-dependent protein binding (GO:0140033)                                                         | 1/18    | 0.033667 | 1                | 29.23977   | 99.15889        | ZMYND8                                           |
| ephrin receptor binding (GO:0046875)                                                                       | 1/19    | 0.035505 | 1                | 27.70083   | 92.4678         | PTPN1                                            |
| gamma-tubulin binding (GO:0043015)                                                                         | 1/19    | 0.035505 | 1                | 27.70083   | 92.4678         | TUBGCP6                                          |
| scavenger receptor activity (GO:0005044)                                                                   | 1/21    | 0.03917  | 1                | 25.06266   | 81.19913        | LRP1                                             |
| voltage-gated ion channel activity involved in regulation of postsynaptic membrane potential (GO:1905030)  | 1/23    | 0.042822 | 1                | 22.8833    | 72.09872        | SCN8A                                            |
| voltage-gated sodium channel activity (GO:0005246)                                                         | 1/23    | 0.042822 | 1                | 22.8833    | 72.09872        | SCN8A                                            |
| N-acyltransferase activity (GO:0016410)                                                                    | 1/25    | 0.04646  | 1                | 21.05263   | 64.61414        | CERS4                                            |
| lipoprotein particle receptor binding (GO:0070325)                                                         | 1/25    | 0.04646  | 1                | 21.05263   | 64.61414        | LRP1                                             |
| RNA polymerase II transcription corepressor activity (GO:0001106)                                          | 1/26    | 0.048274 | 1                | 20.24291   | 61.35364        | ZMYND8                                           |
| microtubule binding (GO:0008017)                                                                           | 2/195   | 0.052872 | 1                | 5.398111   | 15.86982        | MAP1A;TUBGCP6                                    |
| delayed rectifier potassium channel activity (GO:0005251)                                                  | 1/29    | 0.053695 | 1                | 18.14882   | 53.0749         | KCNQ2                                            |
| glucuronosyltransferase activity (GO:0015020)                                                              | 1/33    | 0.060878 | 1                | 15.94896   | 44.63934        | CHPF2                                            |
| protein tyrosine/serine/threonine phosphatase activity (GO:0008138)                                        | 1/34    | 0.062665 | 1                | 15.47988   | 42.8785         | SSH1                                             |
| endopeptidase regulator activity (GO:0061135)                                                              | 1/36    | 0.06623  | 1                | 14.61988   | 39.68752        | PCSK1N                                           |
| peptidase inhibitor activity (GO:0030414)                                                                  | 1/36    | 0.06623  | 1                | 14.61988   | 39.68752        | PCSK1N                                           |
| receptor tyrosine kinase binding (GO:0030971)                                                              | 1/39    | 0.071552 | 1                | 13.49528   | 35.59153        | PTPN1                                            |
| sodium channel activity (GO:0005272)                                                                       | 1/40    | 0.073319 | 1                | 13.15789   | 34.38066        | SCN8A                                            |
| histone deacetylase activity (GO:0004407)                                                                  | 1/40    | 0.073319 | 1                | 13.15789   | 34.38066        | HDAC4                                            |
| protein kinase C binding (GO:0005080)                                                                      | 1/40    | 0.073319 | 1                | 13.15789   | 34.38066        | TOP2B                                            |
| protein methyltransferase activity (GO:0008276)                                                            | 1/41    | 0.075084 | 1                | 12.83697   | 33.23688        | DOT1L                                            |
| histone-lysine N-methyltransferase activity (GO:0018024)                                                   | 1/41    | 0.075084 | 1                | 12.83697   | 33.23688        | DOT1L                                            |
| protein deacetylase activity (GO:0033558)                                                                  | 1/42    | 0.076845 | 1                | 12.53133   | 32.15502        | HDAC4                                            |
| hydrolase activity, acting on acid anhydrides, catalyzing transmembrane movement of substances (GO:001668) | 1/42    | 0.076845 | 1                | 12.53133   | 32.15502        | ABCA5                                            |
| Rac GTPase binding (GO:0048365)                                                                            | 1/43    | 0.078602 | 1                | 12.2399    | 31.13042        | SRGAP3                                           |
| ATPase activity, coupled to transmembrane movement of substances (GO:0042626)                              | 1/45    | 0.082108 | 1                | 11.69591   | 29.23651        | ABCA5                                            |
| P-P-bond-hydrolysis-driven transmembrane transporter activity (GO:0015405)                                 | 1/45    | 0.082108 | 1                | 11.69591   | 29.23651        | ABCA5                                            |
| actin binding (GO:0003779)                                                                                 | 2/254   | 0.083828 | 1                | 4.144219   | 10.27347        | MAP1A;SSH1                                       |
| tubulin binding (GO:0015631)                                                                               | 2/255   | 0.084392 | 1                | 4.127967   | 10.20549        | MAP1A;TUBGCP6                                    |
| transcriptional repressor activity, RNA polymerase II transcription factor binding (GO:0001191)            | 1/47    | 0.0856   | 1                | 11.19821   | 27.52592        | ZMYND8                                           |
| protein-lysine N-methyltransferase activity (GO:0016279)                                                   | 1/47    | 0.0856   | 1                | 11.19821   | 27.52592        | DOT1L                                            |
| histone methyltransferase activity (GO:0042054)                                                            | 1/48    | 0.087342 | 1                | 10.96491   | 26.73163        | DOT1L                                            |
| protein tyrosine kinase binding (GO:1990782)                                                               | 1/48    | 0.087342 | 1                | 10.96491   | 26.73163        | PTPN1                                            |
| methylation-dependent protein binding (GO:0140034)                                                         | 1/52    | 0.094275 | 1                | 10.12146   | 23.90217        | ZMYND8                                           |
| methylated histone binding (GO:0035064)                                                                    | 1/55    | 0.099442 | 1                | 9.569378   | 22.08786        | ZMYND8                                           |
| ATPase activity, coupled to movement of substances (GO:0043492)                                            | 1/56    | 0.101158 | 1                | 9.398496   | 21.53265        | ABCA5                                            |
| transferase activity, transferring acyl groups other than amino-acyl groups (GO:0016747)                   | 1/56    | 0.101158 | 1                | 9.398496   | 21.53265        | CERS4                                            |
| protein tyrosine phosphatase activity (GO:0004725)                                                         | 1/62    | 0.111386 | 1                | 8.488964   | 18.63121        | PTPN1                                            |
| zinc ion binding (GO:0008270)                                                                              | 2/302   | 0.112153 | 1                | 3.485535   | 7.62598         | HDAC4;PTPN1                                      |
| activating transcription factor binding (GO:0033613)                                                       | 1/68    | 0.1215   | 1                | 7.739938   | 16.31453        | HDAC4                                            |
| Rho GTPase binding (GO:0017048)                                                                            | 1/72    | 0.128181 | 1                | 7.309942   | 15.01689        | SRGAP3                                           |
| DNA-dependent ATPase activity (GO:0008094)                                                                 | 1/72    | 0.128181 | 1                | 7.309942   | 15.01689        | TOP2B                                            |
| hydrolase activity, acting on carbon-nitrogen (but not peptide) bonds, in linear amides (GO:0016811)       | 1/75    | 0.133159 | 1                | 7.017544   | 14.14884        | HDAC4                                            |
| protein transporter activity (GO:0008565)                                                                  | 1/80    | 0.141395 | 1                | 6.578947   | 12.86975        | LRP1                                             |
| RNA polymerase II transcription cofactor activity (GO:0001104)                                             | 1/84    | 0.147928 | 1                | 6.265664   | 11.97388        | ZMYND8                                           |
| voltage-gated potassium channel activity (GO:0005249)                                                      | 1/85    | 0.149554 | 1                | 6.19195    | 11.76533        | KCNQ2                                            |
| ion channel activity (GO:0005216)                                                                          | 1/93    | 0.162451 | 1                | 5.65931    | 10.28509        | SCN8A                                            |
| core promoter binding (GO:0001047)                                                                         | 1/97    | 0.168829 | 1                | 5.425936   | 9.652037        | HDAC4                                            |
| cation transmembrane transporter activity (GO:0008324)                                                     | 1/97    | 0.168829 | 1                | 5.425936   | 9.652037        | SCN8A                                            |
| voltage-gated cation channel activity (GO:0022843)                                                         | 1/100   | 0.173581 | 1                | 5.263158   | 9.216384        | KCNQ2                                            |
| potassium channel activity (GO:0005267)                                                                    | 1/100   | 0.173581 | 1                | 5.263158   | 9.216384        | KCNQ2                                            |
| transition metal ion binding (GO:0046914)                                                                  | 2/399   | 0.175256 | 1                | 2.638174   | 4.594399        | HDAC4;PTPN1                                      |
| phosphatase activity (GO:0016791)                                                                          | 1/104   | 0.179875 | 1                | 5.060729   | 8.881634        | SSH1                                             |
| endopeptidase inhibitor activity (GO:0004866)                                                              | 1/111   | 0.190779 | 1                | 4.741584   | 7.855093        | PCSK1N                                           |
| RNA polymerase II transcription factor binding (GO:0001085)                                                | 1/121   | 0.206111 | 1                | 4.349717   | 6.869679        | HDAC4                                            |
| protein kinase binding (GO:0019901)                                                                        | 2/495   | 0.242039 | 1                | 2.126528   | 3.016812        | TOP2B;PTPN1                                      |
| cation channel activity (GO:0005261)                                                                       | 1/146   | 0.243215 | 1                | 3.604903   | 5.09665         | SCN8A                                            |
| RNA polymerase II regulatory region DNA binding (GO:0001012)                                               | 1/201   | 0.318997 | 1                | 2.618487   | 2.991814        | ZMYND8                                           |
| transcription corepressor activity (GO:0003714)                                                            | 1/203   | 0.321609 | 1                | 2.592689   | 2.941198        | ZMYND8                                           |
| regulatory region DNA binding (GO:0000975)                                                                 | 1/224   | 0.348449 | 1                | 2.349624   | 2.477125        | HDAC4                                            |
| GTPase activator activity (GO:0005096)                                                                     | 1/249   | 0.379055 | 1                | 2.113718   | 2.050464        | SRGAP3                                           |
| protein heterodimerization activity (GO:0046982)                                                           | 1/265   | 0.397903 | 1                | 1.986097   | 1.830281        | TOP2B                                            |

|                                                                                |       |          |   |          |          |            |
|--------------------------------------------------------------------------------|-------|----------|---|----------|----------|------------|
| GTPase regulator activity (GO:0030695)                                         | 1/275 | 0.409399 | 1 | 1.913876 | 1.709214 | SRGAP3     |
| calcium ion binding (GO:0005509)                                               | 1/284 | 0.419563 | 1 | 1.853225 | 1.609603 | LRP1       |
| transcription regulatory region sequence-specific DNA binding (GO:0000976)     | 1/292 | 0.428454 | 1 | 1.802451 | 1.527707 | ZMYND8     |
| DNA binding (GO:0003677)                                                       | 2/893 | 0.510875 | 1 | 1.178759 | 0.79169  | HDAC4;SRRT |
| transcription regulatory region DNA binding (GO:0044212)                       | 1/374 | 0.512272 | 1 | 1.407261 | 0.941317 | HDAC4      |
| sequence-specific DNA binding (GO:0043565)                                     | 1/394 | 0.530824 | 1 | 1.335827 | 0.846012 | HDAC4      |
| kinase binding (GO:0019900)                                                    | 1/418 | 0.552181 | 1 | 1.259129 | 0.74777  | PTPN1      |
| metal ion binding (GO:0046872)                                                 | 1/442 | 0.57259  | 1 | 1.19076  | 0.663949 | LRP1       |
| RNA polymerase II regulatory region sequence-specific DNA binding (GO:0000977) | 1/460 | 0.5873   | 1 | 1.144165 | 0.608947 | ZMYND8     |

# Supplementary Table 5

## Supplementary Table. 5: Functional enrichment analysis of differentially expression genes (DEGs): Gene ontological term (GO) Cellular Component.

Differentially expressed genes were associated with several cellular component categories (marked in red)

| Term                                               | Overlap     | P-value         | Adjusted P-value | Odds Ratio     | Combined Score  | Genes                   |
|----------------------------------------------------|-------------|-----------------|------------------|----------------|-----------------|-------------------------|
| <b>axon initial segment (GO:0043194)</b>           | <b>3/9</b>  | <b>5.27E-07</b> | <b>2.35E-04</b>  | <b>175.439</b> | <b>2536.044</b> | <b>SCN8A;KCNQ2;NAV1</b> |
| <b>main axon (GO:0044304)</b>                      | <b>3/33</b> | <b>3.32E-05</b> | <b>0.007401</b>  | <b>47.8469</b> | <b>493.4569</b> | <b>SCN8A;KCNQ2;NAV1</b> |
| <b>node of Ranvier (GO:0033268)</b>                | <b>2/12</b> | <b>2.29E-04</b> | <b>0.034078</b>  | <b>87.7193</b> | <b>735.1581</b> | <b>SCN8A;KCNQ2</b>      |
| intermediate filament cytoskeleton (GO:0045111)    | 2/71        | 0.0080431       | 0.8968047        | 14.8258        | 71.503955       | PHLDB2;PLEC             |
| early endosome (GO:0005769)                        | 3/222       | 0.0085513       | 0.7627719        | 7.112376       | 33.866837       | NEURL1B;PTPN1;LRP1      |
| lytic vacuole membrane (GO:0098852)                | 3/233       | 0.0097525       | 0.7249363        | 6.776598       | 31.377214       | SZT2;LRP1;ABCA5         |
| spindle pole body (GO:0005816)                     | 1/6         | 0.0113473       | 0.7229844        | 87.7193        | 392.87513       | TUBGCP6                 |
| gamma-tubulin ring complex (GO:0008274)            | 1/8         | 0.0151018       | 0.8419253        | 65.78947       | 275.85141       | TUBGCP6                 |
| gamma-tubulin large complex (GO:0000931)           | 1/8         | 0.0151018       | 0.748378         | 65.78947       | 275.85141       | TUBGCP6                 |
| lysosomal membrane (GO:0005765)                    | 3/291       | 0.0176692       | 0.7880442        | 5.425936       | 21.898725       | SZT2;LRP1;ABCA5         |
| focal adhesion (GO:0005925)                        | 3/356       | 0.0298038       | 1                | 4.435245       | 15.581541       | LRP1;PHLDB2;PLEC        |
| U5 snRNP (GO:0005682)                              | 1/23        | 0.0428215       | 1                | 22.8833        | 72.098715       | MAPKBP1                 |
| lysosome (GO:0005764)                              | 3/422       | 0.0456658       | 1                | 3.741581       | 11.548037       | SZT2;LRP1;ABCA5         |
| mitotic spindle pole (GO:0097431)                  | 1/25        | 0.0464596       | 1                | 21.05263       | 64.614136       | MAPKBP1                 |
| U2-type catalytic step 2 spliceosome (GO:0071007)  | 1/29        | 0.0536955       | 1                | 18.14882       | 53.074899       | SRRM2                   |
| sarcoplasm (GO:0016528)                            | 1/31        | 0.0572933       | 1                | 16.97793       | 48.549606       | PLEC                    |
| precatalytic spliceosome (GO:0071011)              | 1/33        | 0.0608778       | 1                | 15.94896       | 44.639341       | MAPKBP1                 |
| Cajal body (GO:0015030)                            | 1/34        | 0.0626651       | 1                | 15.47988       | 42.878497       | SRRM2                   |
| heterochromatin (GO:0000792)                       | 1/41        | 0.0750836       | 1                | 12.83697       | 33.236879       | TOP2B                   |
| cytoskeleton (GO:0005856)                          | 3/520       | 0.0754818       | 1                | 3.036437       | 7.8457408       | NAV1;PHLDB2;PLEC        |
| spliceosomal snRNP complex (GO:0097525)            | 1/59        | 0.106286        | 1                | 8.920607       | 19.996628       | MAPKBP1                 |
| U2-type spliceosomal complex (GO:0005684)          | 1/60        | 0.107989        | 1                | 8.77193        | 19.523907       | SRRM2                   |
| mitotic spindle (GO:0072686)                       | 1/84        | 0.1479279       | 1                | 6.265664       | 11.973875       | MAPKBP1                 |
| peroxisome (GO:0005777)                            | 1/92        | 0.1608497       | 1                | 5.720824       | 10.453575       | SZT2                    |
| microbody (GO:0042579)                             | 1/92        | 0.1608497       | 1                | 5.720824       | 10.453575       | SZT2                    |
| microtubule cytoskeleton (GO:0015630)              | 2/388       | 0.16781         | 1                | 2.712968       | 4.8424394       | MAP1A;NAV1              |
| spindle pole (GO:0000922)                          | 1/107       | 0.1845658       | 1                | 4.918839       | 8.3116042       | MAPKBP1                 |
| spliceosomal complex (GO:0005681)                  | 1/114       | 0.1954088       | 1                | 4.616805       | 7.5376812       | MAPKBP1                 |
| late endosome (GO:0005770)                         | 1/140       | 0.2344669       | 1                | 3.759398       | 5.4527847       | ABCA5                   |
| lytic vacuole (GO:0000323)                         | 1/183       | 0.2950474       | 1                | 2.876043       | 3.5105525       | ABCA5                   |
| microtubule (GO:0005874)                           | 1/210       | 0.3306728       | 1                | 2.506266       | 2.7734988       | MAP1A                   |
| dendrite (GO:0030425)                              | 1/215       | 0.3370748       | 1                | 2.44798        | 2.662057        | MAP1A                   |
| polymeric cytoskeletal fiber (GO:0099513)          | 1/221       | 0.3446787       | 1                | 2.381519       | 2.536658        | MAP1A                   |
| nuclear speck (GO:0016607)                         | 1/296       | 0.4328497       | 1                | 1.778094       | 1.4889132       | SRRM2                   |
| chromatin (GO:0000785)                             | 1/296       | 0.4328497       | 1                | 1.778094       | 1.4889132       | TOP2B                   |
| Golgi membrane (GO:0000139)                        | 1/442       | 0.5725904       | 1                | 1.19076        | 0.6639494       | CHPF2                   |
| centrosome (GO:0005813)                            | 1/461       | 0.5881026       | 1                | 1.141683       | 0.6060667       | TUBGCP6                 |
| Golgi subcompartment (GO:009791)                   | 1/479       | 0.602292        | 1                | 1.09878        | 0.5570958       | CHPF2                   |
| microtubule organizing center (GO:0005815)         | 1/507       | 0.6234233       | 1                | 1.038098       | 0.4905321       | TUBGCP6                 |
| nuclear body (GO:0016604)                          | 1/618       | 0.6969457       | 1                | 0.851644       | 0.3074841       | SRRM2                   |
| integral component of plasma membrane (GO:0005887) | 2/1463      | 0.7772761       | 1                | 0.719502       | 0.1812855       | LRP1;KCNQ2              |

# Supplementary Table 6

**Supplementary Table. 6: Functional enrichment analysis of differentially expression genes (DEGs) using KEGG pathway analysis.**

| Term                                    | Overlap | P-value  | Adjusted P-value | Odds Ratio | Combined Score | Genes       |
|-----------------------------------------|---------|----------|------------------|------------|----------------|-------------|
| Axon guidance                           | 2/181   | 0.046289 | 1                | 5.815644   | 17.870576      | SRGAP3,SSH1 |
| ABC transporters                        | 1/45    | 0.082108 | 1                | 11.69591   | 29.236511      | ABCA5       |
| Sphingolipid metabolism                 | 1/47    | 0.0856   | 1                | 11.19821   | 27.52592       | CERS4       |
| Malaria                                 | 1/49    | 0.08908  | 1                | 10.74114   | 25.974426      | LRP1        |
| Cholesterol metabolism                  | 1/50    | 0.090815 | 1                | 10.52632   | 25.25189       | LRP1        |
| Glycosaminoglycan biosynthesis          | 1/53    | 0.096001 | 1                | 9.930487   | 23.271088      | CHPF2       |
| Lysine degradation                      | 1/59    | 0.106286 | 1                | 8.920607   | 19.996628      | DOT1L       |
| Adherens junction                       | 1/72    | 0.128181 | 1                | 7.309942   | 15.016894      | PTPN1       |
| Insulin resistance                      | 1/108   | 0.186123 | 1                | 4.873294   | 8.193689       | PTPN1       |
| Cholinergic synapse                     | 1/112   | 0.192325 | 1                | 4.699248   | 7.7470287      | KCNQ2       |
| Sphingolipid signaling pathway          | 1/119   | 0.203068 | 1                | 4.422822   | 7.0509343      | CERS4       |
| Insulin signaling pathway               | 1/137   | 0.230056 | 1                | 3.841721   | 5.6451463      | PTPN1       |
| Apelin signaling pathway                | 1/137   | 0.230056 | 1                | 3.841721   | 5.6451463      | HDAC4       |
| Alzheimer disease                       | 1/171   | 0.278628 | 1                | 3.07787    | 3.9331463      | LRP1        |
| Alcoholism                              | 1/180   | 0.290977 | 1                | 2.923977   | 3.6096822      | HDAC4       |
| Transcriptional misregulation in cancer | 1/186   | 0.299095 | 1                | 2.829655   | 3.4153745      | DOT1L       |
| Viral carcinogenesis                    | 1/201   | 0.318997 | 1                | 2.618487   | 2.9918138      | HDAC4       |
| Regulation of actin cytoskeleton        | 1/214   | 0.335799 | 1                | 2.45942    | 2.6838216      | SSH1        |
| Endocytosis                             | 1/244   | 0.373048 | 1                | 2.157032   | 2.1269387      | IQSEC3      |
| MicroRNAs in cancer                     | 1/299   | 0.436125 | 1                | 1.760253   | 1.4607055      | HDAC4       |

# Supplementary Table 7

**Supplementary Table. 7: Gene set enrichment analysis (GSEA) identification of the up- and down-regulated GO-biological processes after early repeated ketamine anesthesia (top 10).** Significant changes are marked in red.

## Up regulated

| NAME                                                            | SIZE | ES         | NES       | NOM p-val | FDR q-val |
|-----------------------------------------------------------------|------|------------|-----------|-----------|-----------|
| GO_CELL_MORPHOGENESIS_INVOLVED_IN_NEURON_DIFFERENTIATION        | 441  | 0.18118502 | 4.3243165 | 0         | 0         |
| GO_SYNAPTIC_SIGNALING                                           | 483  | 0.164537   | 4.029498  | 0         | 0         |
| GO_REGULATION_OF_TRANS_SYNAPTIC_SIGNALING                       | 328  | 0.19423412 | 4.0293503 | 0         | 0         |
| GO_SYNAPSE_ORGANIZATION                                         | 317  | 0.19819386 | 4.0129027 | 0         | 0         |
| GO_REGULATION_OF_NEURON_DIFFERENTIATION                         | 469  | 0.16322348 | 3.9294293 | 0         | 0         |
| GO_REGULATION_OF_NEURON_PROJECTION_DEVELOPMENT                  | 383  | 0.17499566 | 3.8295906 | 0         | 0         |
| GO_NERVOUS_SYSTEM_PROCESS                                       | 488  | 0.15375303 | 3.8240967 | 0         | 0         |
| GO_POSITIVE_REGULATION_OF_NERVOUS_SYSTEM_DEVELOPMENT            | 369  | 0.16713043 | 3.642433  | 0         | 0         |
| GO_REGULATION_OF_CELL_MORPHOGENESIS_INVOLVED_IN_DIFFERENTIATION | 237  | 0.19911109 | 3.60875   | 0         | 0         |
| GO_AXON_DEVELOPMENT                                             | 377  | 0.1621545  | 3.5804563 | 0         | 0         |

## Down regulated

| NAME                                                              | SIZE | ES         | NES        | NOM p-val | FDR q-val |
|-------------------------------------------------------------------|------|------------|------------|-----------|-----------|
| GO_ORGANIC_ACID_METABOLIC_PROCESS                                 | 485  | -0.2270723 | -5.596495  | 0         | 0         |
| GO_GENERATION_OF_PRECURSOR_METABOLITES_AND_ENERGY                 | 326  | -0.2176701 | -4.5525103 | 0         | 0         |
| GO_TRANSLATIONAL_INITIATION                                       | 164  | -0.3015388 | -4.4902916 | 0         | 0         |
| GO_ESTABLISHMENT_OF_PROTEIN_LOCALIZATION_TO_ORGANELLE             | 418  | -0.1864161 | -4.2972703 | 0         | 0         |
| GO_COTRANSLATIONAL_PROTEIN_TARGETING_TO_MEMBRANE                  | 93   | -0.3831721 | -4.2645864 | 0         | 0         |
| GO_ENERGY_DERIVATION_BY_OXIDATION_OF_ORGANIC_COMPOUNDS            | 198  | -0.2507331 | -4.122318  | 0         | 0         |
| GO_ESTABLISHMENT_OF_PROTEIN_LOCALIZATION_TO_ENDOPLASMIC_RETICULUM | 104  | -0.351114  | -4.0865355 | 0         | 0         |
| GO_COFACTOR_METABOLIC_PROCESS                                     | 236  | -0.2281749 | -3.9893894 | 0         | 0         |
| GO_CELLULAR_AMINO_ACID_METABOLIC_PROCESS                          | 185  | -0.2533908 | -3.986226  | 0         | 0         |
| GO_CELLULAR_RESPIRATION                                           | 149  | -0.2795848 | -3.984667  | 0         | 0         |

# Supplementary Table 8

**Supplementary Table. 8: Gene set enrichment analysis (GSEA) identification of the up- and down-regulated GO-molecular function after early repeated ketamine anesthesia (top 10).** Significant changes are marked in red.

## Up regulated

| NAME                                             | SIZE | ES         | NES       | NOM p-val | FDR q-val |
|--------------------------------------------------|------|------------|-----------|-----------|-----------|
| GO_CATION_CHANNEL_ACTIVITY                       | 161  | 0.24580063 | 3.6102238 | 0         | 0         |
| GO_VOLTAGE_GATED_CATION_CHANNEL_ACTIVITY         | 81   | 0.33119586 | 3.5280998 | 0         | 0         |
| GO_GATED_CHANNEL_ACTIVITY                        | 170  | 0.2332068  | 3.4975314 | 0         | 0         |
| GO_PASSIVE_TRANSMEMBRANE_TRANSPORTER_ACTIVITY    | 213  | 0.20930183 | 3.4619002 | 0         | 0         |
| GO_METAL_ION_TRANSMEMBRANE_TRANSPORTER_ACTIVITY  | 241  | 0.18717594 | 3.4302657 | 0         | 0         |
| GO_VOLTAGE_GATED_ION_CHANNEL_ACTIVITY            | 108  | 0.28293413 | 3.4248512 | 0         | 0         |
| GO_REGULATORY_REGION_NUCLEIC_ACID_BINDING        | 448  | 0.13735116 | 3.273669  | 0         | 0         |
| GO_TRANSMEMBRANE_SIGNALING_RECEPTOR_ACTIVITY     | 264  | 0.1643355  | 3.119773  | 0         | 0         |
| GO_SEQUENCE_SPECIFIC_DOUBLE_STRANDED_DNA_BINDING | 406  | 0.13138528 | 2.9234815 | 0         | 6.03E-04  |
| GO_POTASSIUM_CHANNEL_ACTIVITY                    | 65   | 0.3158592  | 2.9101298 | 0         | 5.42E-04  |

## Down regulated

| NAME                                                          | SIZE | ES         | NES        | NOM p-val | FDR q-val |
|---------------------------------------------------------------|------|------------|------------|-----------|-----------|
| GO_STRUCTURAL_CONSTITUENT_OF_RIBOSOME                         | 140  | -0.3625131 | -4.9154854 | 0         | 0         |
| GO_OXIDOREDUCTASE_ACTIVITY                                    | 380  | -0.2054846 | -4.6645784 | 0         | 0         |
| GO_ELECTRON_TRANSFER_ACTIVITY                                 | 71   | -0.3483952 | -3.5111516 | 0         | 0         |
| GO_UNFOLDED_PROTEIN_BINDING                                   | 92   | -0.3063211 | -3.4522877 | 0         | 0         |
| GO_COFACTOR_BINDING                                           | 257  | -0.1882064 | -3.4358764 | 0         | 0         |
| GO_STRUCTURAL_MOLECULE_ACTIVITY                               | 422  | -0.1360299 | -3.1657846 | 0         | 0         |
| GO_COENZYME_BINDING                                           | 167  | -0.2015422 | -3.064216  | 0         | 0         |
| GO_OXIDOREDUCTASE_ACTIVITY_ACTING_ON_A_SULFUR_GROUP_OF_DONORS | 39   | -0.3863761 | -2.844314  | 0         | 1.24E-04  |
| GO_CARBON_OXYGEN_LYASE_ACTIVITY                               | 37   | -0.3907485 | -2.8337123 | 0         | 1.11E-04  |
| GO_VITAMIN_B6_BINDING                                         | 23   | -0.4779838 | -2.768192  | 0         | 1.92E-04  |

# Supplementary Table 9

**Supplementary Table. 9: Gene set enrichment analysis (GSEA) identification of the up- and down-regulated GO-cellular components after early repeated ketamine anesthesia (top 10).** Significant changes are marked in red.

## Up regulated

| NAME                               | SIZE | ES         | NES       | NOM p-val | FDR q-val |
|------------------------------------|------|------------|-----------|-----------|-----------|
| GO_AXON                            | 465  | 0.1885717  | 4.5603476 | 0         | 0         |
| GO_SYNAPTIC_MEMBRANE               | 333  | 0.22234212 | 4.522456  | 0         | 0         |
| GO_NEURON_TO_NEURON_SYNAPSE        | 308  | 0.21065162 | 4.2779417 | 0         | 0         |
| GO_POSTSYNAPTIC_MEMBRANE           | 249  | 0.22514796 | 4.138114  | 0         | 0         |
| GO_AXON_PART                       | 301  | 0.18656564 | 3.7905285 | 0         | 0         |
| GO_PRESYNAPTIC_MEMBRANE            | 127  | 0.28577015 | 3.692235  | 0         | 0         |
| GO_PRESYNAPSE                      | 373  | 0.15829703 | 3.5496469 | 0         | 0         |
| GO_PLASMA_MEMBRANE_PROTEIN_COMPLEX | 303  | 0.1749063  | 3.5438    | 0         | 0         |
| GO_PRESYNAPTIC_ACTIVE_ZONE         | 58   | 0.38782075 | 3.5294006 | 0         | 0.00E+00  |
| GO_MAIN_AXON                       | 58   | 0.38558477 | 3.4209569 | 0         | 0.00E+00  |

## Down regulated

| NAME                                            | SIZE | ES         | NES        | NOM p-val | FDR q-val |
|-------------------------------------------------|------|------------|------------|-----------|-----------|
| GO_MITOCHONDRIAL_MATRIX                         | 328  | -0.2680792 | -5.5291944 | 0         | 0         |
| GO_ORGANELLE_INNER_MEMBRANE                     | 373  | -0.2292796 | -5.116826  | 0         | 0         |
| GO_RIBOSOMAL_SUBUNIT                            | 165  | -0.3340354 | -5.0792055 | 0         | 0         |
| GO_RIBOSOME                                     | 200  | -0.2999541 | -4.9023514 | 0         | 0         |
| GO_MITOCHONDRIAL_PROTEIN_COMPLEX                | 219  | -0.2804582 | -4.7518125 | 0         | 0         |
| GO_MITOCHONDRIAL_MEMBRANE_PART                  | 177  | -0.2659288 | -4.061971  | 0         | 0         |
| GO_LARGE_RIBOSOMAL_SUBUNIT                      | 102  | -0.3275839 | -3.8572156 | 0         | 0         |
| GO_INNER_MITOCHONDRIAL_MEMBRANE_PROTEIN_COMPLEX | 106  | -0.3053613 | -3.6948695 | 0         | 0.00E+00  |
| GO_CYTOSOLIC_RIBOSOME                           | 97   | -0.3166761 | -3.6027818 | 0         | 0.00E+00  |
| GO_BLOOD_MICROPARTICLE                          | 37   | -0.4889873 | -3.5712862 | 0         | 0.00E+00  |



# Supplementary Table 10

**Supplementary Table. 10: Gene set enrichment analysis (GSEA) identification of the up- and down- regulated KEGG pathways after early repeated ketamine anesthesia (top 10). Significant changes are marked in red.**

## Up regulated

| NAME                                                | SIZE | ES         | NES       | NOM p-val  | FDR q-val  |
|-----------------------------------------------------|------|------------|-----------|------------|------------|
| KEGG_TYPE_II_DIABETES_MELLITUS                      | 31   | 0.34471616 | 2.3403354 | 0.00209205 | 0.03140269 |
| KEGG_AXON_GUIDANCE                                  | 95   | 0.19418265 | 2.1839118 | 0.00197628 | 0.04430335 |
| KEGG_NEUROACTIVE_LIGAND_RECEPTOR_INTERACTION        | 80   | 0.1902526  | 2.0042784 | 0.00775194 | 0.10355631 |
| KEGG_MAPK_SIGNALING_PATHWAY                         | 171  | 0.12936616 | 1.9839814 | 0.0021645  | 0.08530339 |
| KEGG_BASAL_CELL_CARCINOMA                           | 18   | 0.37637243 | 1.9078703 | 0.00773694 | 0.10643002 |
| KEGG_ERBB_SIGNALING_PATHWAY                         | 68   | 0.19968374 | 1.8984882 | 0.00578035 | 0.09261265 |
| KEGG_CHEMOKINE_SIGNALING_PATHWAY                    | 101  | 0.14946818 | 1.7269373 | 0.02788845 | 0.1892394  |
| KEGG_NOTCH_SIGNALING_PATHWAY                        | 33   | 0.25704092 | 1.7133173 | 0.03082852 | 0.17824526 |
| KEGG_GLYCOSAMINOGLYCAN_BIOSYNTHESIS_HEPARAN_SULFATE | 21   | 0.28783244 | 1.5620546 | 0.05719921 | 0.3316105  |
| KEGG_CELL_ADHESION_MOLECULES_CAMS                   | 50   | 0.18794179 | 1.5493605 | 0.055666   | 0.3168493  |

## Down regulated

| NAME                                           | SIZE | ES         | NES        | NOM p-val | FDR q-val  |
|------------------------------------------------|------|------------|------------|-----------|------------|
| KEGG_RIBOSOME                                  | 79   | -0.3939749 | -4.092171  | 0         | 0          |
| KEGG_PARKINSONS_DISEASE                        | 101  | -0.2788788 | -3.2177384 | 0         | 0          |
| KEGG_OXIDATIVE_PHOSPHORYLATION                 | 104  | -0.261278  | -3.1489658 | 0         | 0          |
| KEGG_HUNTINGTONS_DISEASE                       | 138  | -0.2236266 | -3.0296643 | 0         | 0          |
| KEGG_CITRATE_CYCLE_TCA_CYCLE                   | 28   | -0.4632101 | -2.905669  | 0         | 2.73E-04   |
| KEGG_PROTEASOME                                | 38   | -0.4035107 | -2.8830554 | 0         | 2.27E-04   |
| KEGG_VALINE_LEUCINE_AND_ISOLEUCINE_DEGRADATION | 35   | -0.4058174 | -2.8208015 | 0         | 3.70E-04   |
| KEGG_GLUTATHIONE_METABOLISM                    | 26   | -0.4101099 | -2.5194607 | 0         | 0.00231003 |
| KEGG_BUTANOATE_METABOLISM                      | 21   | -0.4637483 | -2.5188985 | 0         | 0.00205336 |
| KEGG_SPLICEOSOME                               | 108  | -0.2052562 | -2.489203  | 0         | 0.00196341 |

# Supplementary Table 11

Supplementary Table. 11: Gene set enrichment analysis (GSEA) identification of the up- and down-regulated cell types after early repeated ketamine anesthesia. Significant changes are marked in red.

## Up regulated

| NAME                          | SIZE        | ES                | NES             | NOM p-val  | FDR q-val         |
|-------------------------------|-------------|-------------------|-----------------|------------|-------------------|
| <b>S1_PYRNEURONS_ZEISEL</b>   | <b>132</b>  | <b>0.46433485</b> | <b>6.25041</b>  | <b>0</b>   | <b>0</b>          |
| <b>NEURONS_CAHOY</b>          | <b>1216</b> | <b>0.12935367</b> | <b>4.853767</b> | <b>0</b>   | <b>0</b>          |
| <b>CA1_PYRNEURONS_ZEISEL</b>  | <b>273</b>  | <b>0.12822126</b> | <b>2.434659</b> | <b>0</b>   | <b>0.00210648</b> |
| <b>GDT_NKT_T4_MOD56_JOJIC</b> | <b>25</b>   | <b>0.39785957</b> | <b>2.340757</b> | <b>0</b>   | <b>0.00316351</b> |
| TCELL_MOD18_JOJIC             | 41          | 0.19358362        | 1.4577919       | 0.09179688 | 0.22328442        |
| ENDOTHELIAL_ZEISEL            | 149         | 0.10238693        | 1.4139128       | 0.09657948 | 0.2196796         |
| ABTCELL_MOD57_JOJIC           | 30          | 0.21077402        | 1.3723031       | 0.11776859 | 0.21937726        |
| MICROGLIA_ALBRIGHT            | 370         | 0.056979          | 1.254951        | 0.21165049 | 0.30756843        |
| BCELL_MOD33_JOJIC             | 52          | 0.1387481         | 1.185923        | 0.23863636 | 0.34671465        |
| INTERNEURONS_ZEISEL           | 193         | 0.05944887        | 0.97519255      | 0.46168584 | 0.60588807        |

## Down regulated

| NAME                    | SIZE        | ES                | NES               | NOM p-val         | FDR q-val         |
|-------------------------|-------------|-------------------|-------------------|-------------------|-------------------|
| <b>ASTROCYTES_CAHOY</b> | <b>1346</b> | <b>-0.0680018</b> | <b>-2.673346</b>  | <b>0</b>          | <b>5.56E-04</b>   |
| <b>EPENDYMAL_ZEISEL</b> | <b>118</b>  | <b>-0.1709573</b> | <b>-2.1323743</b> | <b>0.00203252</b> | <b>0.00667181</b> |
| OLIGODENDROCYTES_ZEISEL | 276         | -0.0891083        | -1.6628462        | 0.03529412        | 0.05675643        |
| OLIGODENDROCYTES_CAHOY  | 1250        | -0.0410535        | -1.5511676        | 0.04528302        | 0.07187642        |
| MURAL_ZEISEL            | 45          | -0.1609735        | -1.2989994        | 0.15678777        | 0.16048439        |

**Supplementary notes**  
**(Supplementary Note 1-15)**

# Supplementary note 1

The results of statistical  
analysis for Figure 1

# Fig1\_A.LOR\_duration\_Male Data analysis using R

Boohwi Hong

## Package install

## Data import

## Data structure

```
str(d1)
```

```
## 'data.frame': 60 obs. of 3 variables:  
## $ subject : int 1 2 3 4 5 6 7 8 9 10 ...  
## $ inject : chr "1st_inject" "1st_inject" "1st_inject" "1st_inject" ...  
## $ duration: int 520 273 416 0 0 191 412 223 207 526 ...
```

## Explorative data analysis with graphics

```
## # A tibble: 5 x 11  
## inject variable n min max median iqr mean sd se ci  
## <chr> <chr> <dbl> <dbl> <dbl> <dbl> <dbl> <dbl> <dbl> <dbl> <dbl>  
## 1 1st_inject duration 12 0 526 215 413 231. 203. 58.7 129.  
## 2 2nd_inject duration 12 0 360 0 69.5 79.2 144. 41.7 91.7  
## 3 3rd_inject duration 12 0 370 0 0 30.8 107. 30.8 67.9  
## 4 4th_inject duration 12 0 190 0 0 15.8 54.8 15.8 34.8  
## 5 5th_inject duration 12 0 0 0 0 0 0 0 0 0
```

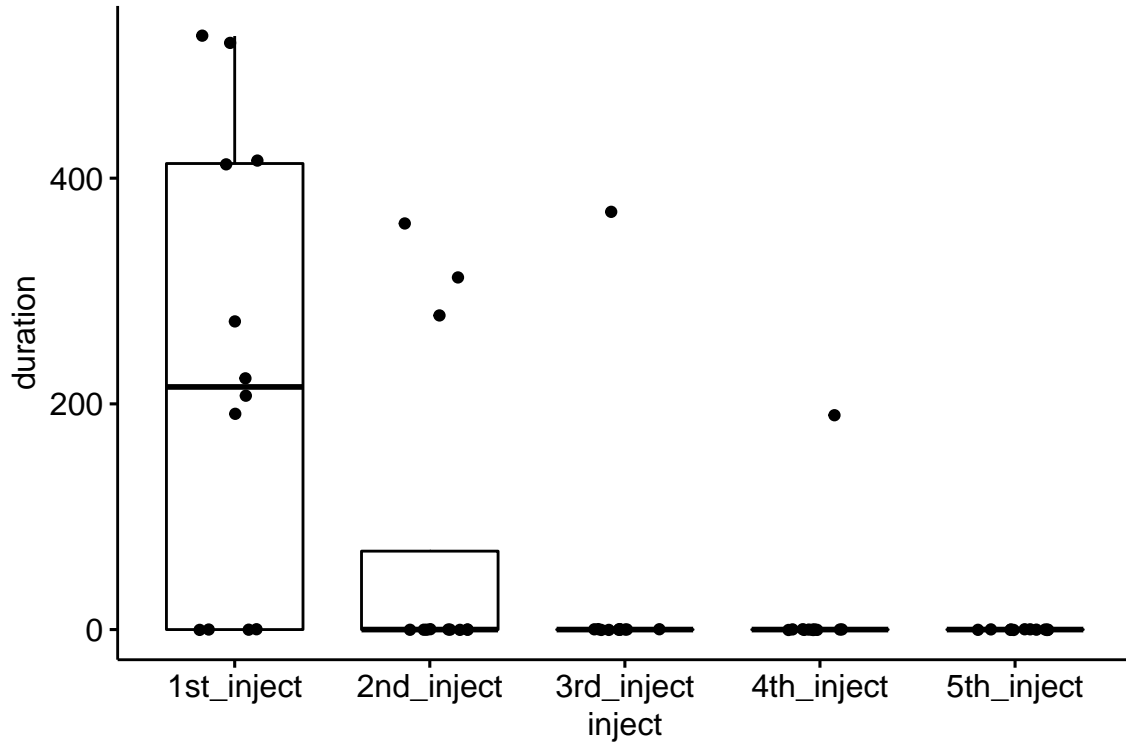

## Model fit

```
## # A tibble: 1 x 6
##   .y.      n statistic    df      p method
## * <chr>  <int>    <dbl> <dbl>  <dbl> <chr>
## 1 duration    12      18.7     4 0.000909 Friedman test
```

## Effect size

```
## # A tibble: 1 x 5
##   .y.      n effsize method  magnitude
## * <chr>  <int>    <dbl> <chr>    <ord>
## 1 duration    12    0.389 Kendall W moderate
```

## Multiple pairwise-comparisons

```
## # A tibble: 10 x 9
##   .y.      group1      group2      n1      n2 statistic      p p.adj p.adj.signif
## * <chr>  <chr>      <chr>      <int> <int>    <dbl> <dbl> <dbl> <chr>
## 1 duration 1st_inject 2nd_inject    12    12      38 0.076 0.756 ns
## 2 duration 1st_inject 3rd_inject    12    12      40 0.044 0.44 ns
## 3 duration 1st_inject 4th_inject    12    12      36 0.014 0.143 ns
## 4 duration 1st_inject 5th_inject    12    12      36 0.014 0.143 ns
## 5 duration 2nd_inject 3rd_inject    12    12       6 0.855 1 ns
```

|    |    |          |            |            |    |    |   |       |   |    |
|----|----|----------|------------|------------|----|----|---|-------|---|----|
| ## | 6  | duration | 2nd_inject | 4th_inject | 12 | 12 | 9 | 0.201 | 1 | ns |
| ## | 7  | duration | 2nd_inject | 5th_inject | 12 | 12 | 6 | 0.181 | 1 | ns |
| ## | 8  | duration | 3rd_inject | 4th_inject | 12 | 12 | 2 | 1     | 1 | ns |
| ## | 9  | duration | 3rd_inject | 5th_inject | 12 | 12 | 1 | 1     | 1 | ns |
| ## | 10 | duration | 4th_inject | 5th_inject | 12 | 12 | 1 | 1     | 1 | ns |

## Interpretation of result

## 1. The duration was statistically significantly different at the different time points  
 ## p = 0.001

# Fig1\_B.Weight\_Male Data analysis using R

Boohwi Hong

## Package install

## Data import

## Data structure

```
str(d1)
```

```
## 'data.frame': 135 obs. of 4 variables:
## $ subject: int 1 2 3 4 5 6 7 8 9 10 ...
## $ group : chr "cont" "cont" "cont" "cont" ...
## $ inject : chr "1st_inject" "1st_inject" "1st_inject" "1st_inject" ...
## $ weight : num 8.5 8.2 9.3 8 7.5 8.3 7.6 8.1 8.3 8.6 ...
```

## Explorative data analysis with graphics

```
##      group      inject  n Mean Conf.level Percentile.lower Percentile.upper
## 1  anesth 1st_inject 12 8.31      0.95           8.07           8.54
## 2  anesth 2nd_inject 12 8.36      0.95           8.10           8.60
## 3  anesth 3rd_inject 12 8.38      0.95           8.02           8.72
## 4  anesth 4th_inject 12 8.73      0.95           8.25           9.17
## 5  anesth 5th_inject 12 8.90      0.95           8.43           9.34
## 6   cont 1st_inject 15 8.16      0.95           7.94           8.39
## 7   cont 2nd_inject 15 8.25      0.95           8.01           8.50
## 8   cont 3rd_inject 15 8.48      0.95           8.27           8.69
## 9   cont 4th_inject 15 8.69      0.95           8.49           8.90
## 10  cont 5th_inject 15 8.84      0.95           8.59           9.11
```



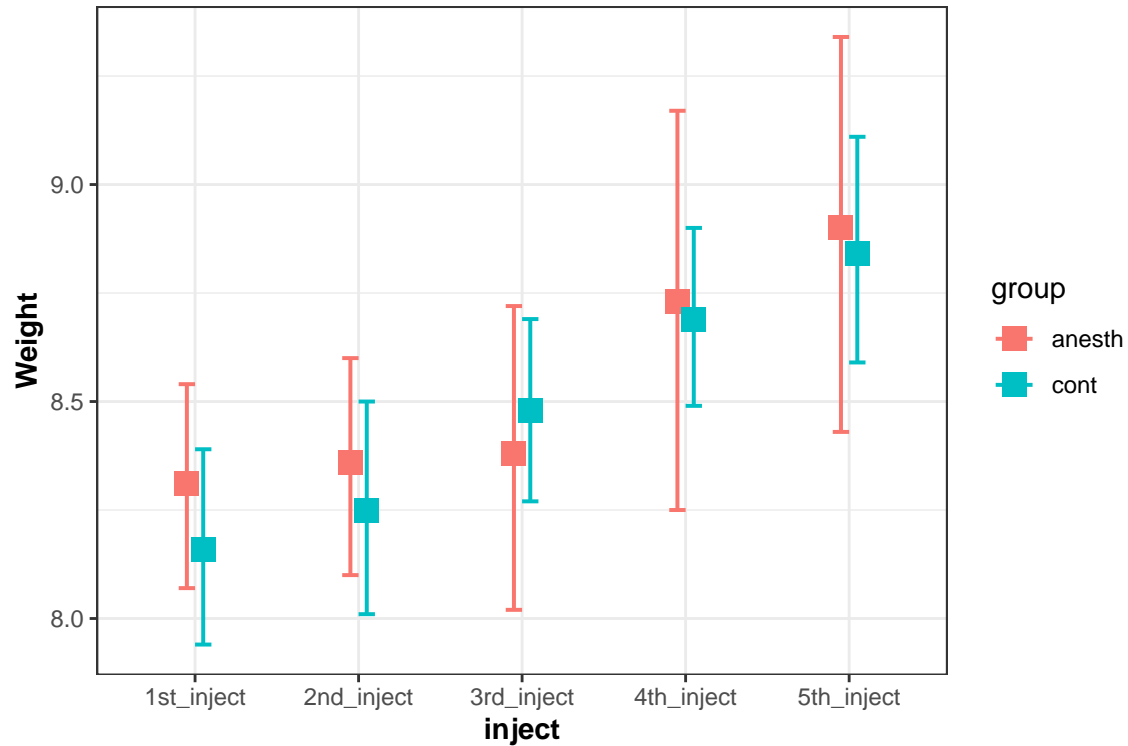

## Model fit

```
##
## Error: subject
##      Df Sum Sq Mean Sq
## group 1  1.726   1.726
##
## Error: subject:inject
##      Df Sum Sq Mean Sq
## inject 4  4.278   1.07
##
## Error: Within
##           Df Sum Sq Mean Sq F value  Pr(>F)
## group      1  7.895   7.895  32.804 7.69e-08 ***
## inject     4  4.508   1.127   4.683 0.00151 **
## group:inject 4  1.831   0.458   1.901 0.11460
## Residuals 120 28.882   0.241
## ---
## Signif. codes:  0 '***' 0.001 '**' 0.01 '*' 0.05 '.' 0.1 ' ' 1
```

## Interpretation of result

## 1. Difference exist between groups

## p = 0.000

## 2. Difference exist between measurement points

## p = 0.002

## 3. Significant interaction do not exist between groups and measurement points

## p = 0.115

# Fig1\_E.OFT\_distance\_Male Data analysis using R

Boohwi Hong

## Package install

## Data import

## Data structure

```
str(d1)
```

```
## 'data.frame':  23 obs. of  3 variables:  
## $ subject : int  1 2 3 4 5 6 7 8 9 10 ...  
## $ group   : chr  "cont_saline" "cont_saline" "cont_saline" "cont_saline" ...  
## $ distance: num  100.2 123 106 78.8 128.9 ...
```

## Explorative data analysis with graphics

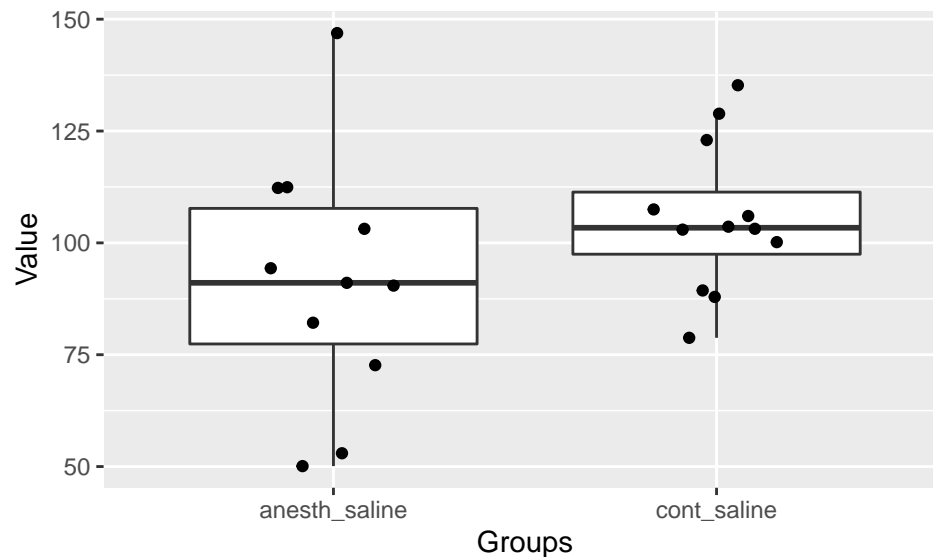

Easystat function developed by S. Park (available at <https://rpubs.com/goodlebang>)

## Statistical Result

```
easystat(d1)
```

```
## 1. Normality assumption test by Shapiro_Wilk test is
## p = 0.666
## Normality assumption was not rejected
## 2. Equal variance test by Bartlett test is
## p = 0.112
## Equal variance assumption was not rejected
## 3. The result of anova is
## p = 0.1577
## A statistically significant difference do not exist between groups
```

# Fig1\_F.OFT\_distance\_Male Data analysis using R

Boohwi Hong

## Package install

## Data import

## Data structure

```
str(d1)
```

```
## 'data.frame': 48 obs. of 3 variables:  
## $ subject : int 1 2 3 4 5 6 7 8 9 10 ...  
## $ group : chr "cont_1st" "cont_1st" "cont_1st" "cont_1st" ...  
## $ distance: num 121 141 219 126 160 ...
```

## Explorative data analysis with graphics

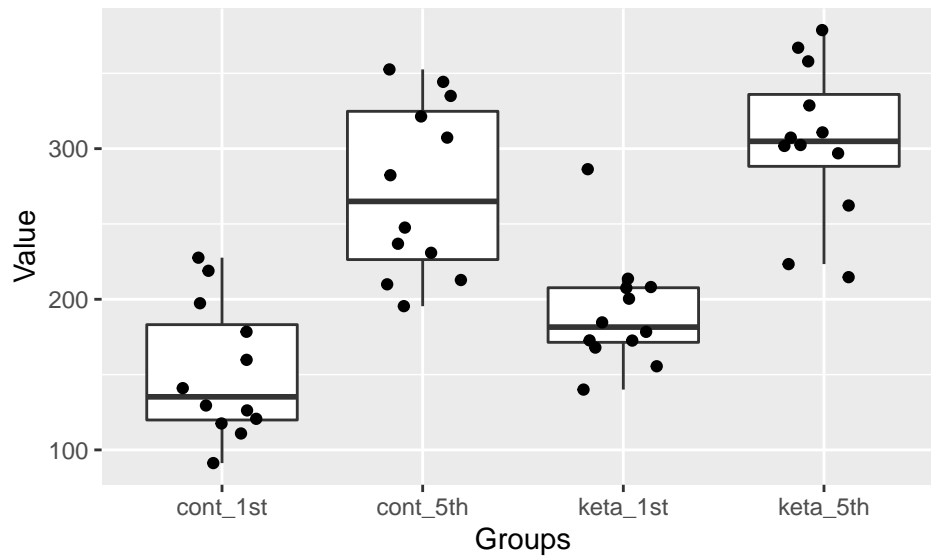

Easystat function developed by S. Park (available at <https://rpubs.com/goodlebang>)

## Statistical Result

```
easystat(d1)
```

```
## 1. Normality assumption test by Shapiro_Wilk test is
## p = 0.43
## Normality assumption was not rejected
## 2. Equal variance test by Bartlett test is
## p = 0.556
## Equal variance assumption was not rejected
## 3. The result of anova is
## p = 0.000
## A statistically significant difference exist between groups

## Tukey multiple comparisons of means
## 95% family-wise confidence level
##
## Fit: aov(formula = d1[, 3] ~ d1[, 2], data = d1)
##
## $'d1[, 2]'
```

|                      | diff      | lwr        | upr       | p adj     |
|----------------------|-----------|------------|-----------|-----------|
| ## cont_5th-cont_1st | 121.45438 | 68.71147   | 174.19729 | 0.0000012 |
| ## keta_1st-cont_1st | 39.06347  | -13.67944  | 91.80638  | 0.2119723 |
| ## keta_5th-cont_1st | 152.73480 | 99.99189   | 205.47771 | 0.0000000 |
| ## keta_1st-cont_5th | -82.39092 | -135.13383 | -29.64801 | 0.0007838 |
| ## keta_5th-cont_5th | 31.28042  | -21.46249  | 84.02333  | 0.3983189 |
| ## keta_5th-keta_1st | 113.67133 | 60.92842   | 166.41424 | 0.0000045 |

# Fig1\_G.OFT\_distance\_Male Data analysis using R

Boohwi Hong

## Package install

## Data import

## Data structure

```
str(d1)
```

```
## 'data.frame': 120 obs. of 4 variables:
## $ subject : int 13 14 15 16 17 18 19 20 21 22 ...
## $ group : chr "cont_keta" "cont_keta" "cont_keta" "cont_keta" ...
## $ trial : int 1 1 1 1 1 1 1 1 1 1 ...
## $ distance: num 121 141 219 126 160 ...
```

## Explorative data analysis with graphics

| ##    | group       | trial | n  | Mean | Conf.level | Percentile.lower | Percentile.upper |
|-------|-------------|-------|----|------|------------|------------------|------------------|
| ## 1  | anesth_keta | 1     | 12 | 191  | 0.95       | 172              | 213              |
| ## 2  | anesth_keta | 2     | 12 | 222  | 0.95       | 205              | 239              |
| ## 3  | anesth_keta | 3     | 12 | 295  | 0.95       | 267              | 323              |
| ## 4  | anesth_keta | 4     | 12 | 287  | 0.95       | 261              | 314              |
| ## 5  | anesth_keta | 5     | 12 | 304  | 0.95       | 276              | 331              |
| ## 6  | cont_keta   | 1     | 12 | 152  | 0.95       | 128              | 176              |
| ## 7  | cont_keta   | 2     | 12 | 188  | 0.95       | 156              | 219              |
| ## 8  | cont_keta   | 3     | 12 | 229  | 0.95       | 195              | 270              |
| ## 9  | cont_keta   | 4     | 12 | 266  | 0.95       | 233              | 303              |
| ## 10 | cont_keta   | 5     | 12 | 273  | 0.95       | 242              | 304              |

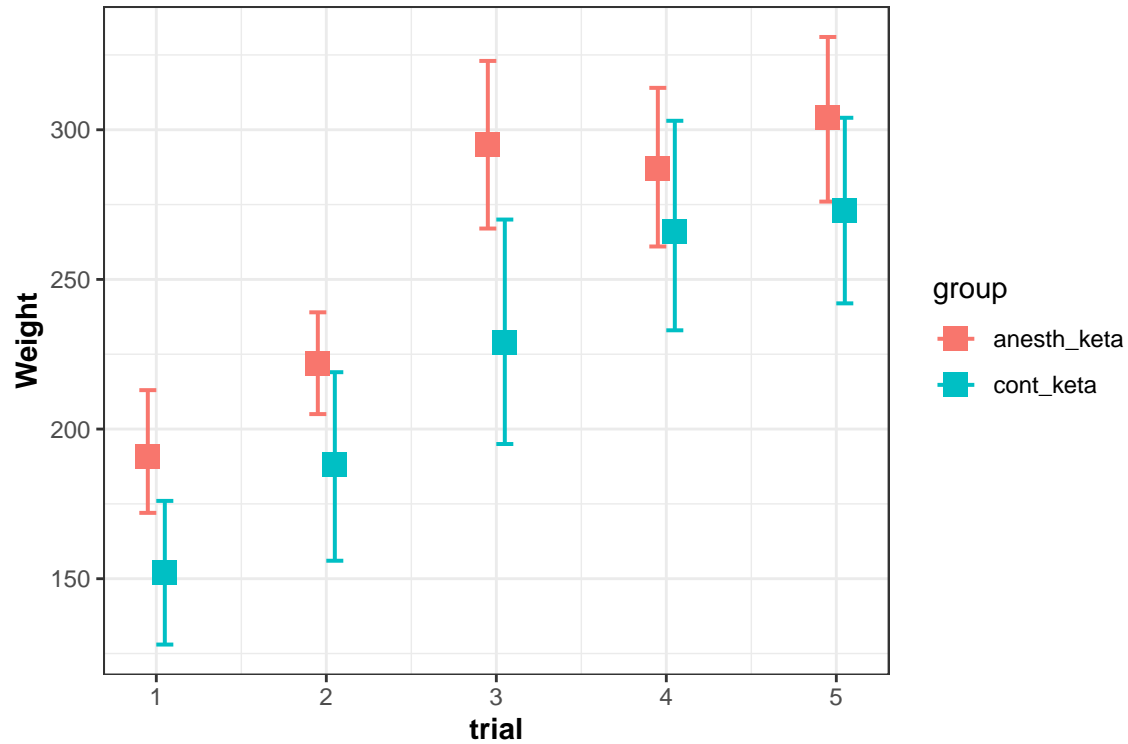

## Model fit

```
##
## Error: subject
##      Df Sum Sq Mean Sq
## group 1  31388   31388
##
## Error: subject:trial
##      Df Sum Sq Mean Sq
## trial 1 190087  190087
##
## Error: Within
##           Df Sum Sq Mean Sq F value Pr(>F)
## group      1  19660   19660   6.873 0.00995 **
## trial      1  36058   36058  12.605 0.00056 ***
## group:trial 1    868    868   0.303 0.58292
## Residuals 114 326100   2861
## ---
## Signif. codes:  0 '***' 0.001 '**' 0.01 '*' 0.05 '.' 0.1 ' ' 1
```



## Interpretation of result

## 1. Difference exist between groups

## p = 0.010

## 2. Difference exist between measurement points

## p = 0.001

## 3. Significant interaction do not exist between groups and measurement points

## p = 0.583

# Supplementary Note 2

The results of statistical  
analysis for Figure 2

# Fig2\_B.keta-CPP\_Anesth\_Male Data analysis using R

Boohwi Hong

## Statistical Result

```
## Present data is ** Fig2_B.keta-CPP_Anesth_Male.csv **  
##  
## ** Data structure **  
## 'data.frame': 54 obs. of 3 variables:  
## $ subject : int 1 2 3 4 5 6 7 8 9 10 ...  
## $ group : chr "pre" "pre" "pre" "pre" ...  
## $ duration: num 289 295 294 191 274 ...  
##  
## ** Explorative data analysis with graphics**
```

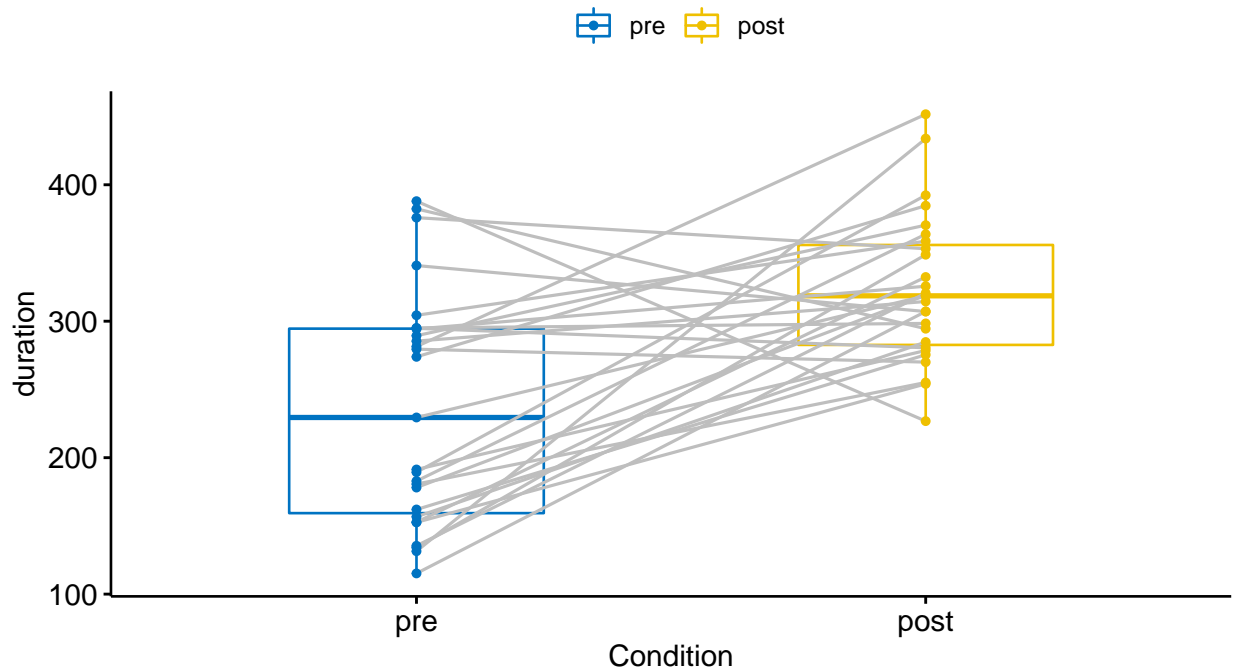

```
## 1. Normality assumption test by Shapiro_Wilk test is  
## p = 0.114  
## Normality assumption was not rejected  
## 2. The result of paired t-test is  
## p = 0.000  
## A statistically significant difference exist between groups
```

# Fig2\_B.keta-CPP\_Control\_MaleData analysis using R

Boohwi Hong

## Statistical Result

```
## Present data is ** Fig2_B.keta-CPP_Control_Male.csv **  
##  
## ** Data structure **  
## 'data.frame': 52 obs. of 3 variables:  
## $ subject : int 1 2 3 4 5 6 7 8 9 10 ...  
## $ group : chr "pre" "pre" "pre" "pre" ...  
## $ duration: num 237 230 264 195 267 ...  
##  
## ** Explorative data analysis with graphics**
```

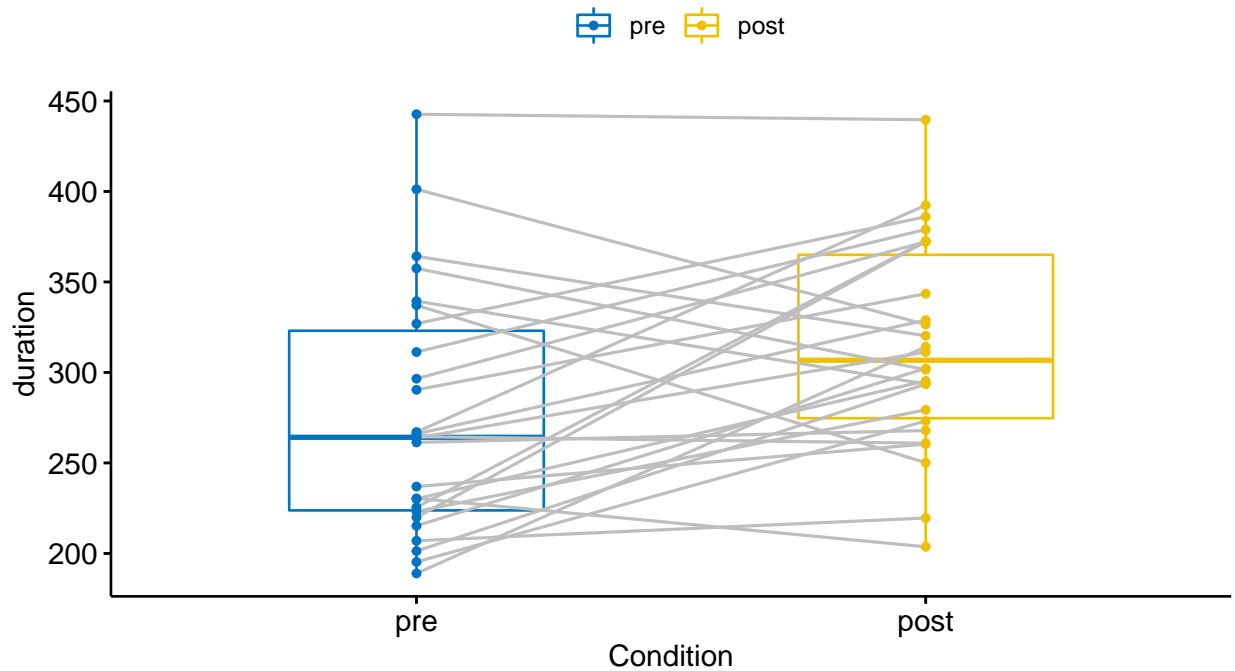

```
## 1. Normality assumption test by Shapiro_Wilk test is  
## p = 0.135  
## Normality assumption was not rejected  
## 2. The result of paired t-test is  
## p = 0.007  
## A statistically significant difference exist between groups
```

# Fig2\_C.keta-CPP\_CPPscore\_MaleData analysis using R

Boohwi Hong

```
## Present data is ** Fig2_C.keta-CPP_CPPscore_Male.csv **
##
## ** Data structure **
## 'data.frame': 53 obs. of 3 variables:
## $ subject : int 1 2 3 4 5 6 7 8 9 10 ...
## $ group : chr "control" "control" "control" "control" ...
## $ difference: num 23.5 -26.8 47.4 77.8 125.4 ...
##
## ** Explorative data analysis with graphics**
```

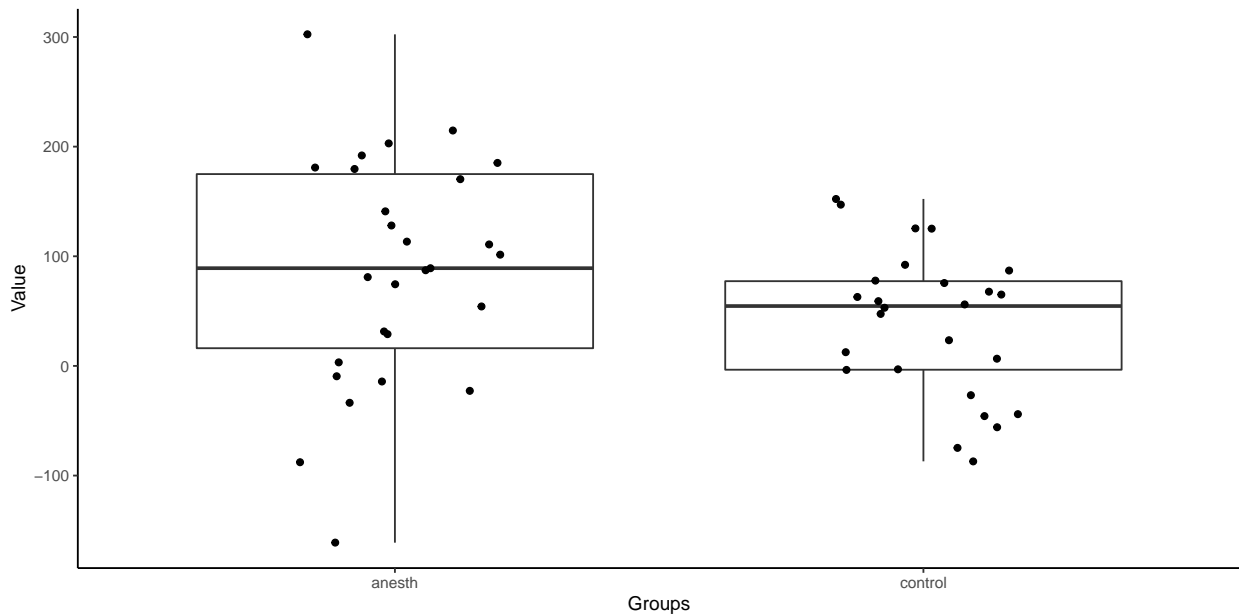

```
## 1. Normality assumption test by Shapiro_Wilk test is
## p = 0.672
## Normality assumption was not rejected
## 2. Equal variance test by Bartlett test is
## p = 0.032
## Equal variance assumption was rejected
## 3. The result of Welch ANOVA is
## p = 0.049
## A statistically significant difference exist between groups
##
## Tukey multiple comparisons of means
## 95% family-wise confidence level
##
```

```
## Fit: aov(formula = d1[, 3] ~ d1[, 2])
##
## $`d1[, 2]`
##           diff           lwr           upr           p adj
## control-anesth -48.47184 -96.86342 -0.08025694 0.0496353
```

# Fig2\_D.nicotine-CPP\_Anesth\_MaleData analysis using R

Boohwi Hong

## Statistical Result

```
## Present data is ** Fig2_D.nicotine-CPP_Anesth_Male.csv **  
##  
## ** Data structure **  
## 'data.frame': 32 obs. of 3 variables:  
## $ subject : int 1 2 3 4 5 6 7 8 9 10 ...  
## $ group : chr "pre" "pre" "pre" "pre" ...  
## $ duration: num 287 285 249 340 318 ...  
##  
## ** Explorative data analysis with graphics**
```

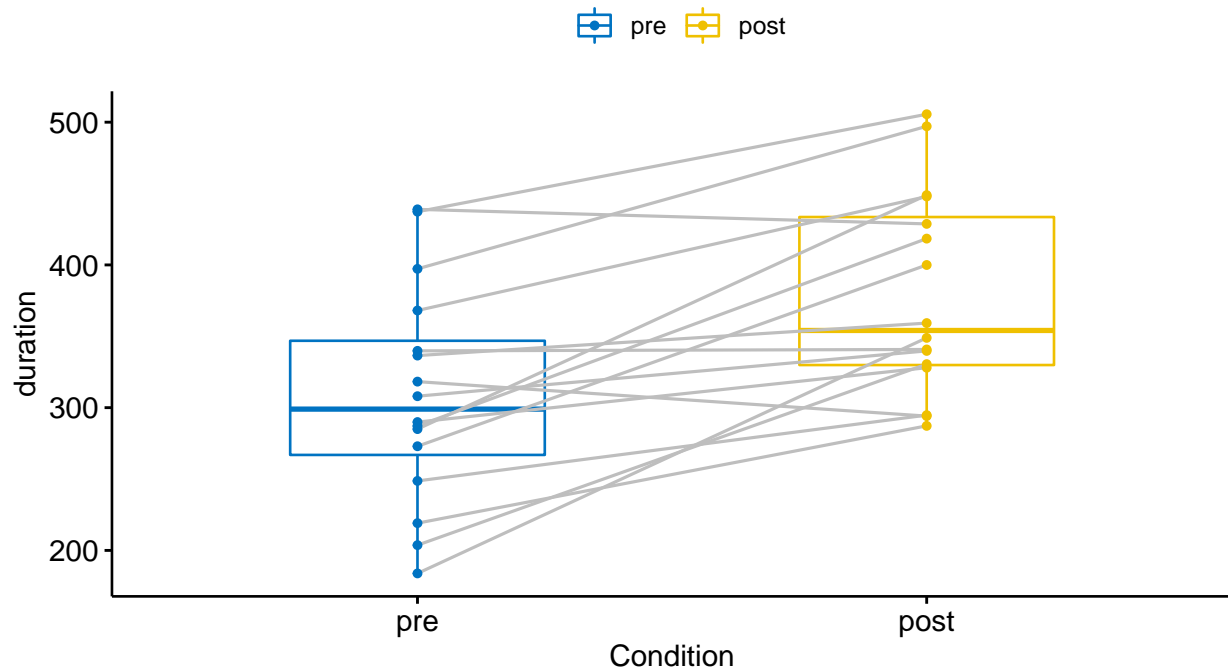

```
## 1. Normality assumption test by Shapiro_Wilk test is  
## p = 0.251  
## Normality assumption was not rejected  
## 2. The result of paired t-test is  
## p = 0.000  
## A statistically significant difference exist between groups
```

# Fig2\_D.nicotine-CPP\_Control\_MaleData analysis using R

Boohwi Hong

## Statistical Result

```
## Present data is ** Fig2_D.nicotine-CPP_Control_Male.csv **  
##  
## ** Data structure **  
## 'data.frame': 32 obs. of 3 variables:  
## $ subject : int 1 2 3 4 5 6 7 8 9 10 ...  
## $ group : chr "pre" "pre" "pre" "pre" ...  
## $ duration: num 352 292 398 317 267 ...  
##  
## ** Explorative data analysis with graphics**
```

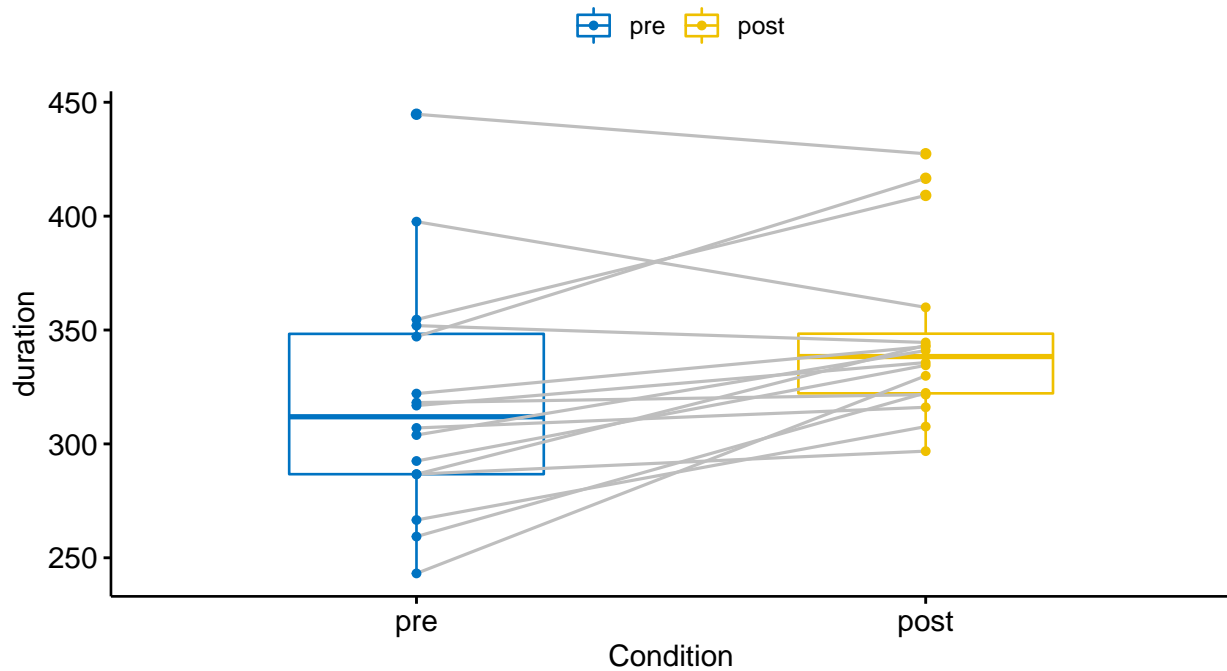

```
## 1. Normality assumption test by Shapiro_Wilk test is  
## p = 0.032  
## Normality assumption was rejected  
## 2. The result of Wilcoxon test is  
## p = 0.056  
## A statistically significant difference do not exist between groups
```



# Fig2\_E.nicotine-CPP\_CPPscore\_MaleData analysis using R

Boohwi Hong

```
## Present data is ** Fig2_E.nicotine-CPP_CPPscore_Male.csv **  
##  
## ** Data structure **  
## 'data.frame': 32 obs. of 3 variables:  
## $ subject : int 1 2 3 4 5 6 7 8 9 10 ...  
## $ group : chr "control" "control" "control" "control" ...  
## $ difference: num -7.39 42.01 -37.62 18.89 41.01 ...  
##  
## ** Explorative data analysis with graphics**
```

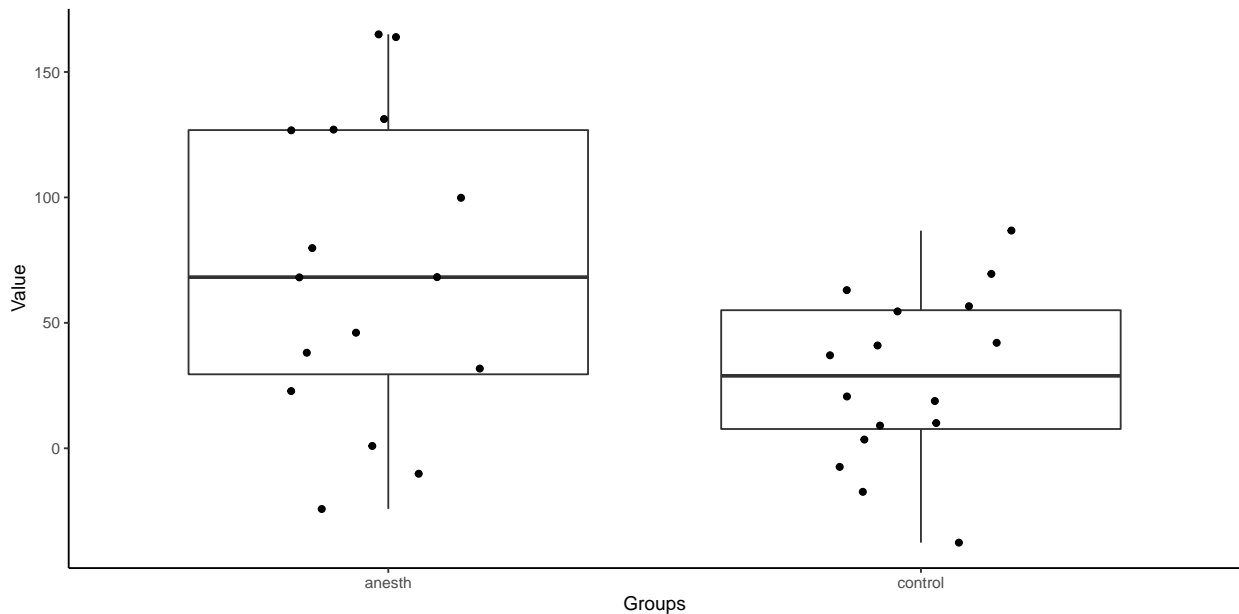

```
## 1. Normality assumption test by Shapiro_Wilk test is  
## p = 0.937  
## Normality assumption was not rejected  
## 2. Equal variance test by Bartlett test is  
## p = 0.034  
## Equal variance assumption was rejected  
## 3. The result of Welch ANOVA is  
## p = 0.021  
## A statistically significant difference exist between groups  
##  
## Tukey multiple comparisons of means  
## 95% family-wise confidence level  
##
```

```
## Fit: aov(formula = d1[, 3] ~ d1[, 2])
##
## $`d1[, 2]`
##           diff           lwr           upr           p adj
## control-anesth -42.81144 -78.13698 -7.485899 0.0191947
```

# Supplementary Note 3

The results of statistical  
analysis for Figure 3

# Fig3\_B.keta-CPP\_anesth\_male(Adult)Data analysis using R

Boohwi Hong

## Statistical Result

```
## Present data is ** Fig3_B.keta-CPP_anesth_male(Adult)xlsx.csv ** ##  
## ** Data structure **  
## 'data.frame': 50 obs. of 3 variables:  
## $ subject: int 1 2 3 4 5 6 7 8 9 10 ...  
## $ group : chr "pre" "pre" "pre" "pre" ...  
## $ duration : num 396 242 353 339 290 ...  
##  
## ** Explorative data analysis with graphics**
```

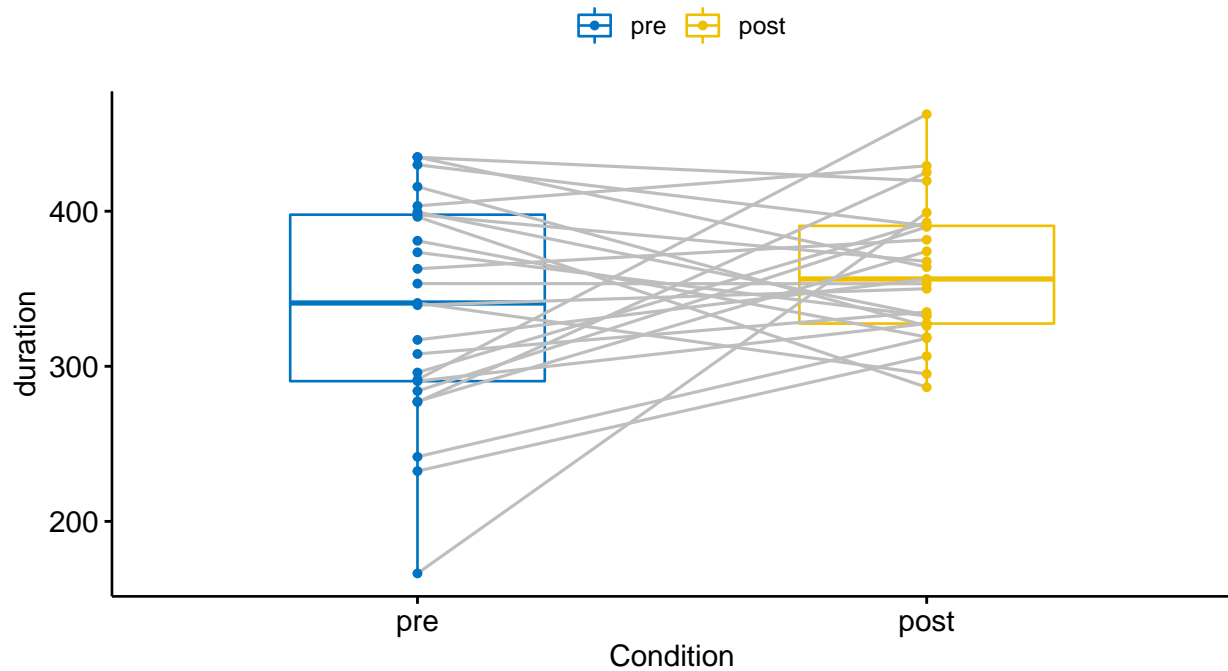

```
## 1. Normality assumption test by Shapiro_Wilk test is  
## p = 0.357  
## Normality assumption was not rejected  
## 2. The result of paired t-test is  
## p = 0.183  
## A statistically significant difference do not exist between groups
```

# Fig3\_B.keta-CPP\_control\_male(Adult)Data analysis using R

Boohwi Hong

## Statistical Result

```
## Present data is ** Fig3_B.keta-CPP_control_male(Adult)xlsx.csv **  
##  
## ** Data structure **  
## 'data.frame': 52 obs. of 3 variables:  
## $ subject: int 1 2 3 4 5 6 7 8 9 10 ...  
## $ group : chr "pre" "pre" "pre" "pre" ...  
## $ duration : num 263 294 330 276 351 ...  
##  
## ** Explorative data analysis with graphics**
```

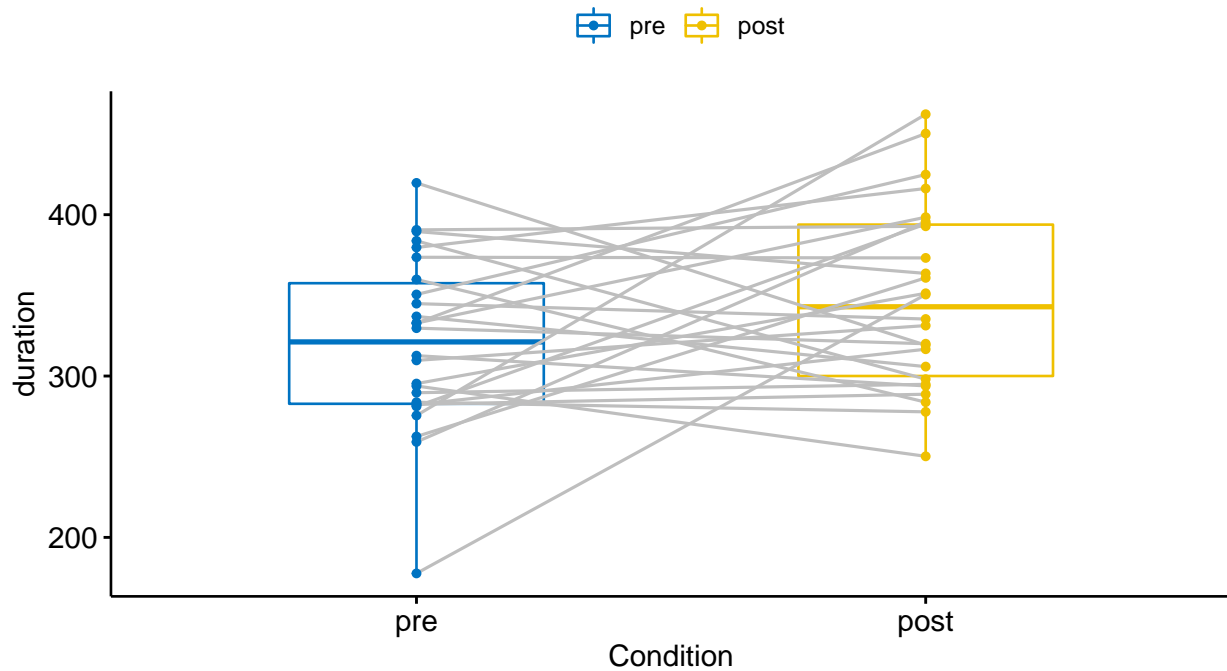

```
## 1. Normality assumption test by Shapiro_Wilk test is  
## p = 0.572  
## Normality assumption was not rejected  
## 2. The result of paired t-test is  
## p = 0.074  
## A statistically significant difference do not exist between groups
```

# Fig3\_C. keta-CPP\_CPPscore\_male(Adult)Data analysis using R

Boohwi Hong

```
## Present data is ** Fig3_C. keta-CPP_CPPscore_male(Adult)xlsx.csv ** ##  
## ** Data structure **  
## 'data.frame': 51 obs. of 3 variables:  
  
## $ subject: int 1 2 3 4 5 6 7 8 9 10 ...  
## $ group : chr "control" "control" "control" "control" ...  
## $ difference: num 98.33 -43.58 -9.66 186.68 74.31 ...  
##  
## ** Explorative data analysis with graphics**
```

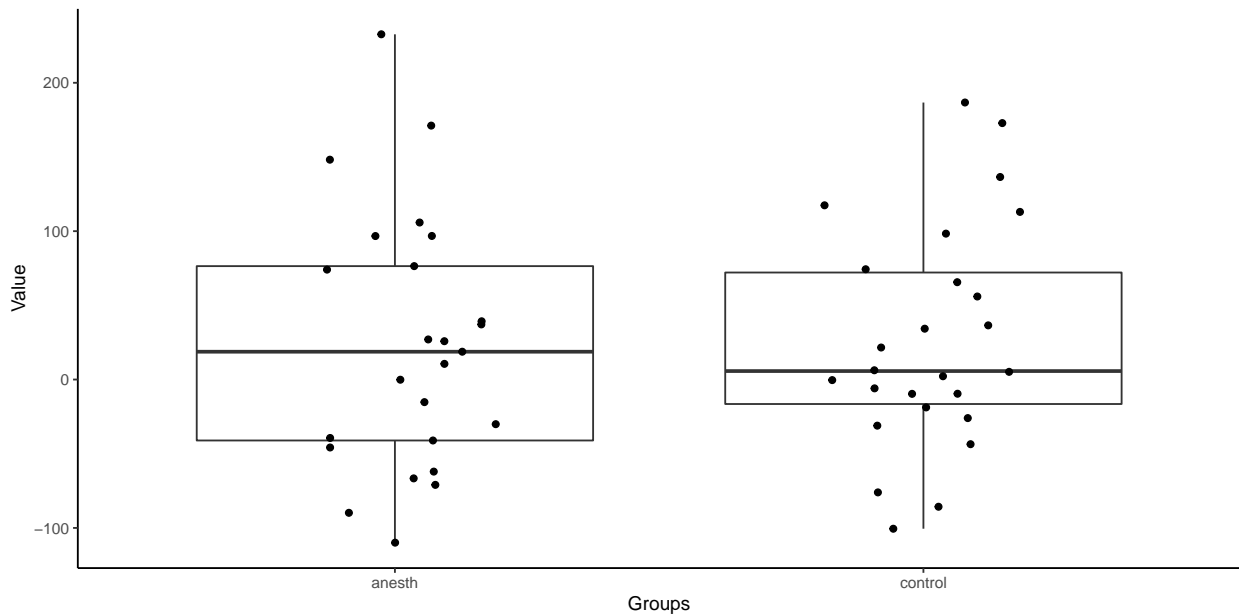

```
## 1. Normality assumption test by Shapiro_Wilk test is  
## p = 0.223  
## Normality assumption was not rejected  
## 2. Equal variance test by Bartlett test is  
## p = 0.530  
## Equal variance assumption was not rejected  
## 3. The result of anova is  
## p = 0.858  
## A statistically significant difference do not exist between groups  
##
```

# Fig3\_D.nico-CPP\_anesth\_Male(Adult)Data analysis using R

Boohwi Hong

## Statistical Result

```
## Present data is ** Fig3_D.nico-CPP_anesth_Male(Adult).csv ** ##  
## ** Data structure **  
## 'data.frame': 34 obs. of 3 variables:  
## $ subjectint 1 2 3 4 5 6 7 8 9 10 ...  
## $ group : chr "pre" "pre" "pre" "pre" ...  
## $ duration : num 332 387 339 289 315 ...  
##  
## ** Explorative data analysis with graphics**
```

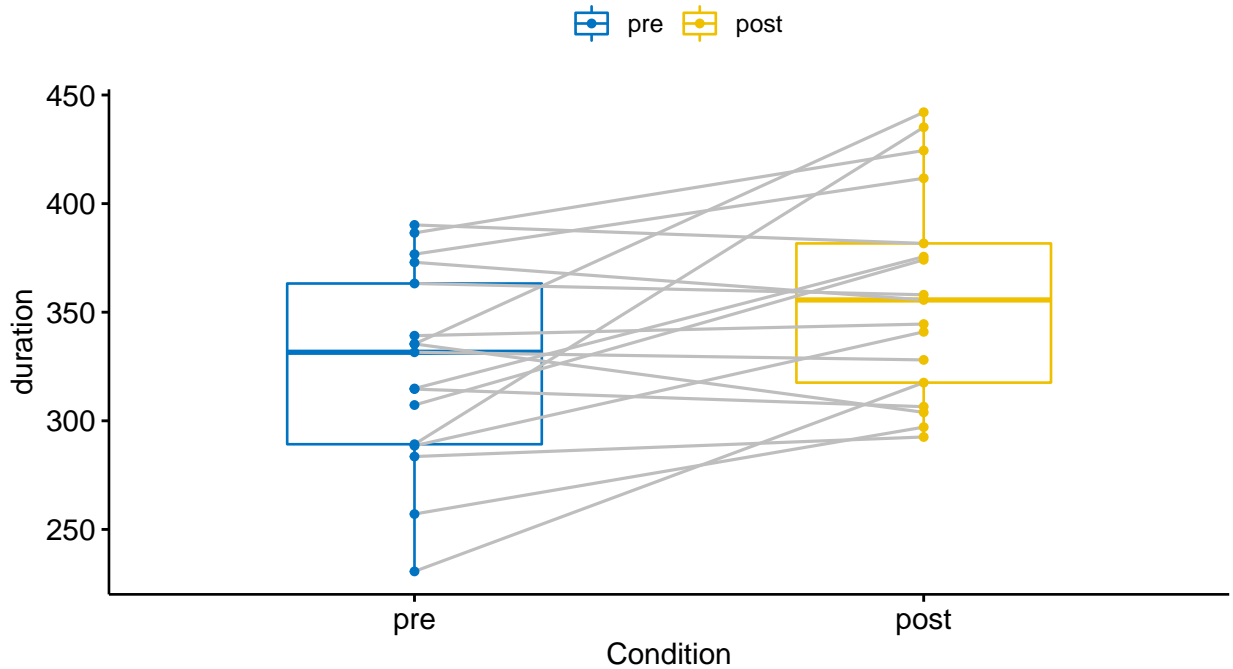

```
## 1. Normality assumption test by Shapiro_Wilk test is  
## p = 0.608  
## Normality assumption was not rejected  
## 2. The result of paired t-test is  
## p = 0.011  
## A statistically significant difference exist between groups
```

# Fig3\_D.nico-CPP\_control\_Male(Adult)Data analysis using R

Boohwi Hong

## Statistical Result

```
## Present data is ** Fig3_D.nico-CPP_control_Male(Adult).csv ** ##  
## ** Data structure **  
## 'data.frame': 36 obs. of 3 variables:  
## $ subjectint 1 2 3 4 5 6 7 8 9 10 ...  
## $ group : chr "pre" "pre" "pre" "pre" ...  
## $ duration : num 207 389 224 352 226 ...  
##  
## ** Explorative data analysis with graphics**
```

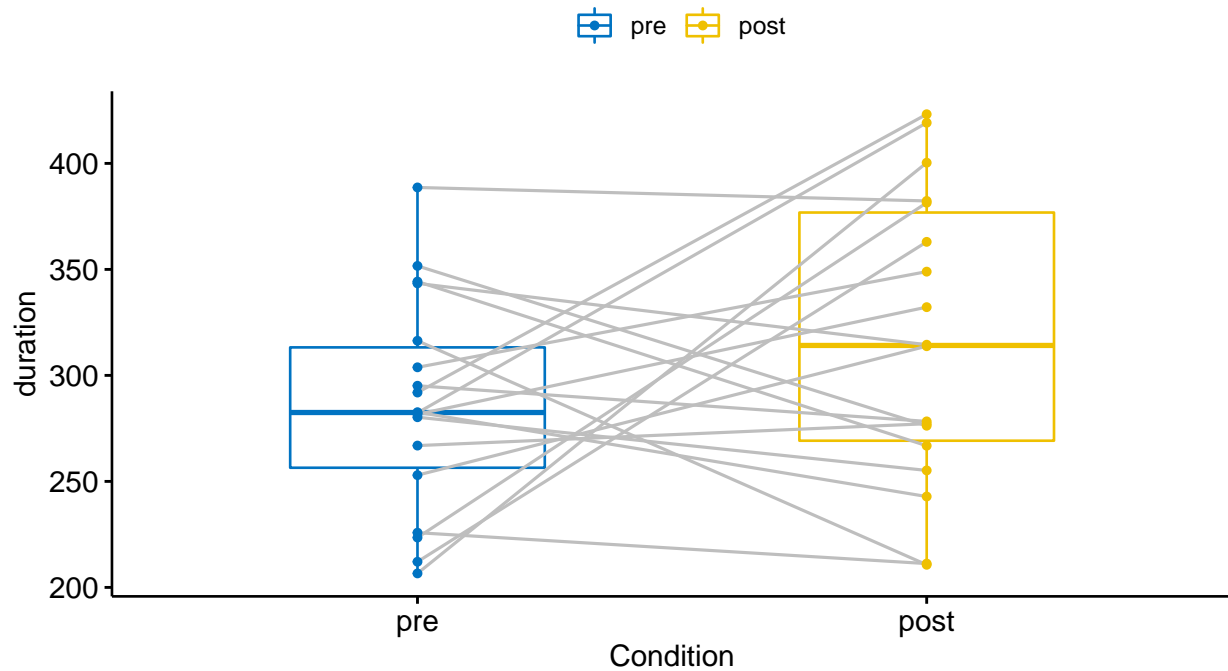

```
## 1. Normality assumption test by Shapiro_Wilk test is  
## p = 0.385  
## Normality assumption was not rejected  
## 2. The result of paired t-test is  
## p = 0.172  
## A statistically significant difference do not exist between groups
```



# Fig3\_E.nico-CPP\_CPPscore\_Male(Adult)Data analysis using R

Boohwi Hong

```
## Present data is ** Fig3_E.nico-CPP_CPPscore_Male(Adult).csv **##  
## ** Data structure **  
  
## 'data.frame': 35 obs. of 3 variables:  
## $ subject: int 1 2 3 4 5 6 7 8 9 10 ...  
## $ group : chr "control" "control" "control" "control" ...  
## $ difference: num 193.72 -6.35 157.92 -75.37 -14.58 ...  
##  
## ** Explorative data analysis with graphics**
```

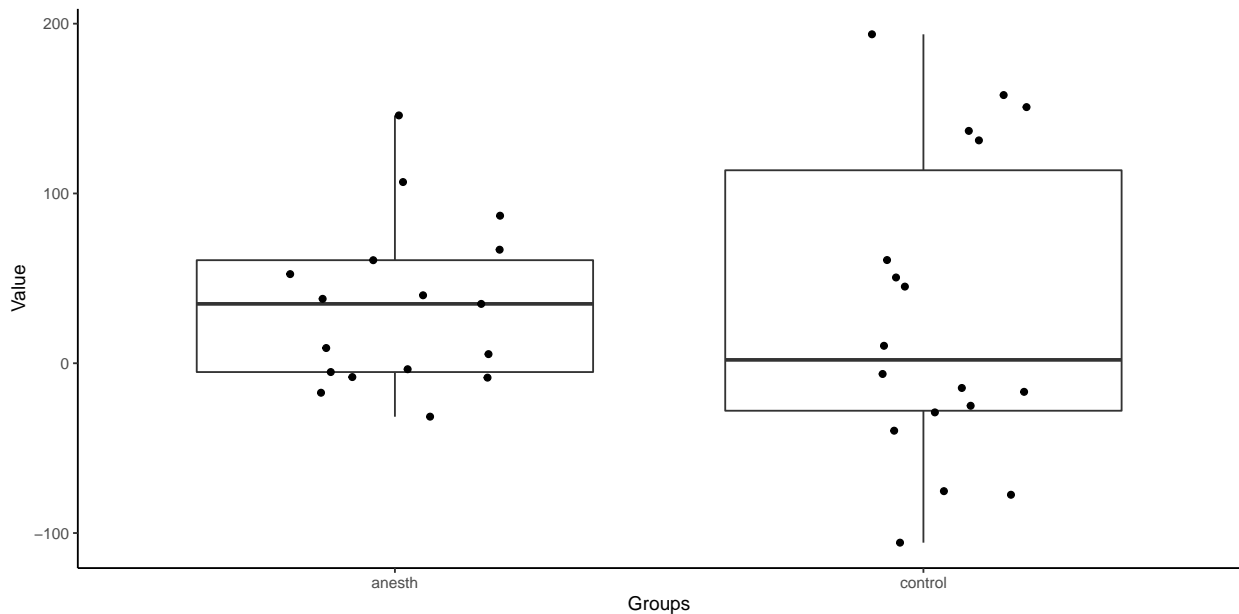

```
## 1. Normality assumption test by Shapiro_Wilk test is  
## p = 0.199  
## Normality assumption was not rejected  
## 2. Equal variance test by Bartlett test is  
## p = 0.016  
## Equal variance assumption was rejected  
## 3. The result of Welch ANOVA is  
## p = 0.894  
## A statistically significant difference do not exist between groups  
##
```

# Supplementary Note 4

The results of statistical  
analysis for Figure 4



# Data analysis using R

Boohwi Hong

```
## Present data is ** Fig4_C.action_potential_30_Male.csv **
##
## ** Data structure **
## 'data.frame': 13 obs. of 4 variables:
## $ subject : int 1 2 3 4 5 6 7 8 9 10 ...
## $ group : chr "control" "control" "control" "control" ...
## $ input.current : int 30 30 30 30 30 30 30 30 30 30 ...
## $ action.potential: num 0 0 0 6 1.67 ...
##
## ** Explorative data analysis with graphics**
```

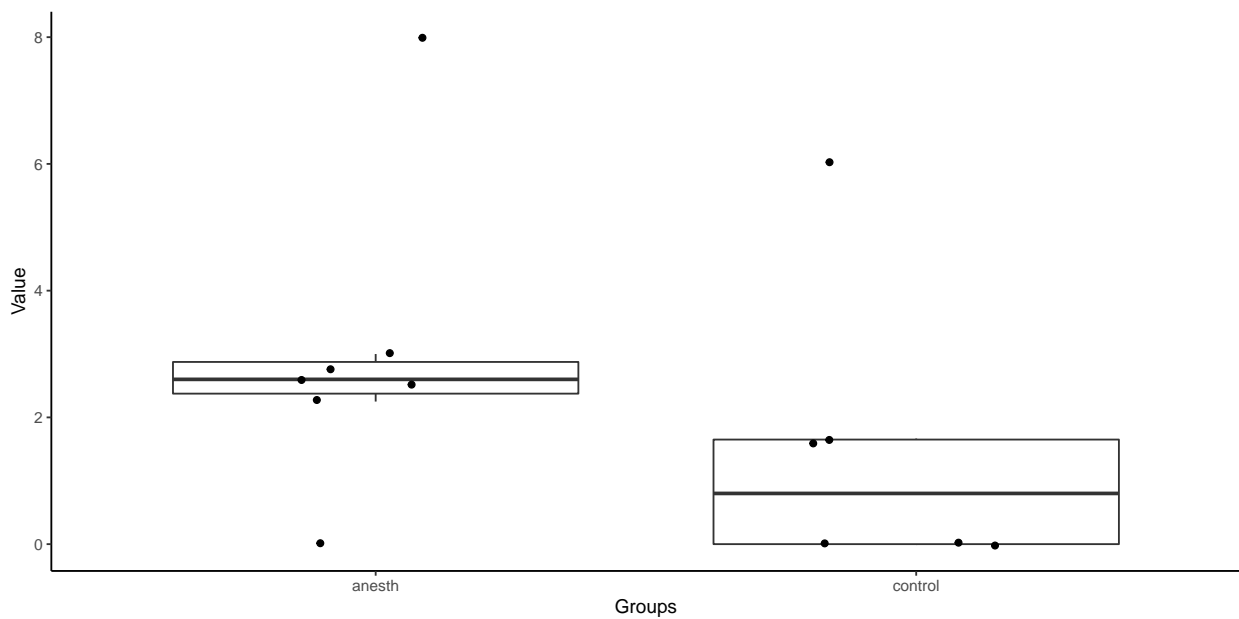

```
## 1. Normality assumption test by Shapiro_Wilk test is
## p = 0.007
## Normality assumption was rejected
## 2. The result of Kruskal_Wallis test:
## p = 0.096
## A statistically significant difference do not exist between groups
##
```

# Data analysis using R

Boohwi Hong

```
## Present data is ** Fig4_C.action_potential_40_Male.csv **
##
## ** Data structure **
## 'data.frame': 13 obs. of 4 variables:
## $ subject : int 1 2 3 4 5 6 7 8 9 10 ...
## $ group : chr "control" "control" "control" "control" ...
## $ input.current : int 40 40 40 40 40 40 40 40 40 40 ...
## $ action.potential: num 3.5 3.5 1 8.5 5.33 ...
##
## ** Explorative data analysis with graphics**
```

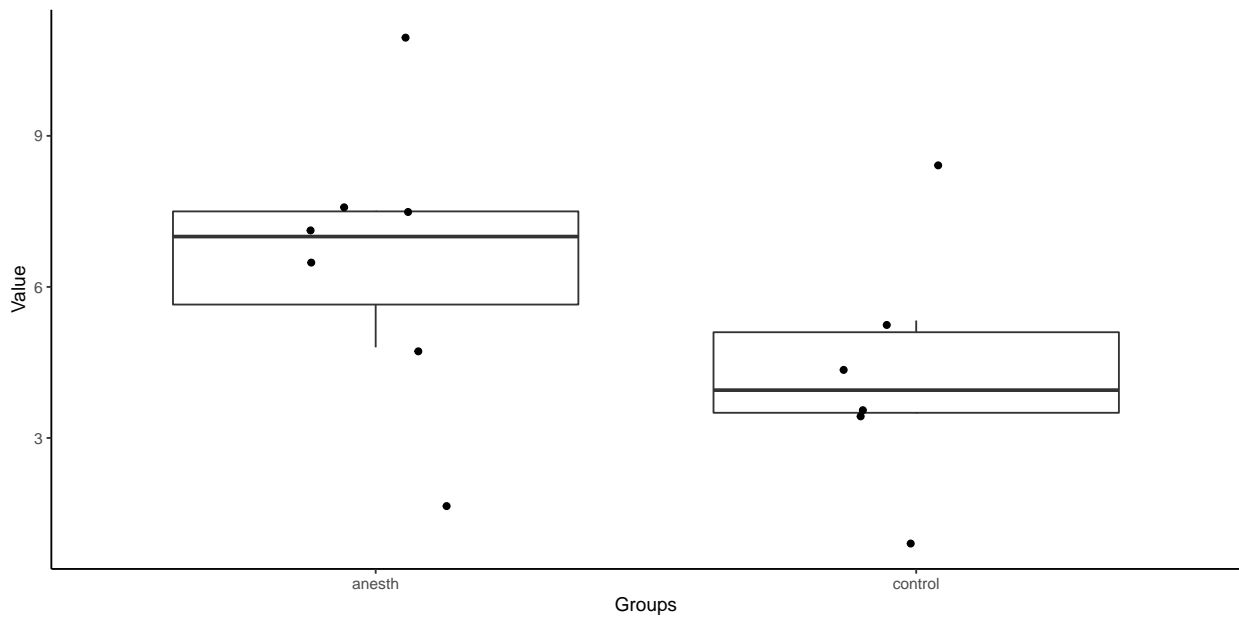

```
## 1. Normality assumption test by Shapiro_Wilk test is
## p = 0.574
## Normality assumption was not rejected
## 2. Equal variance test by Bartlett test is
## p = 0.733
## Equal variance assumption was not rejected
## 3. The result of anova is
## p = 0.179
## A statistically significant difference do not exist between groups
##
```

# Data analysis using R

Boohwi Hong

```
## Present data is ** Fig4_C.action_potential_50_Male.csv **
##
## ** Data structure **
## 'data.frame': 13 obs. of 4 variables:
## $ subject : int 1 2 3 4 5 6 7 8 9 10 ...
## $ group : chr "control" "control" "control" "control" ...
## $ input.current : int 50 50 50 50 50 50 50 50 50 50 ...
## $ action.potential: num 6.5 6.5 4.5 10 8.33 ...
##
## ** Explorative data analysis with graphics**
```

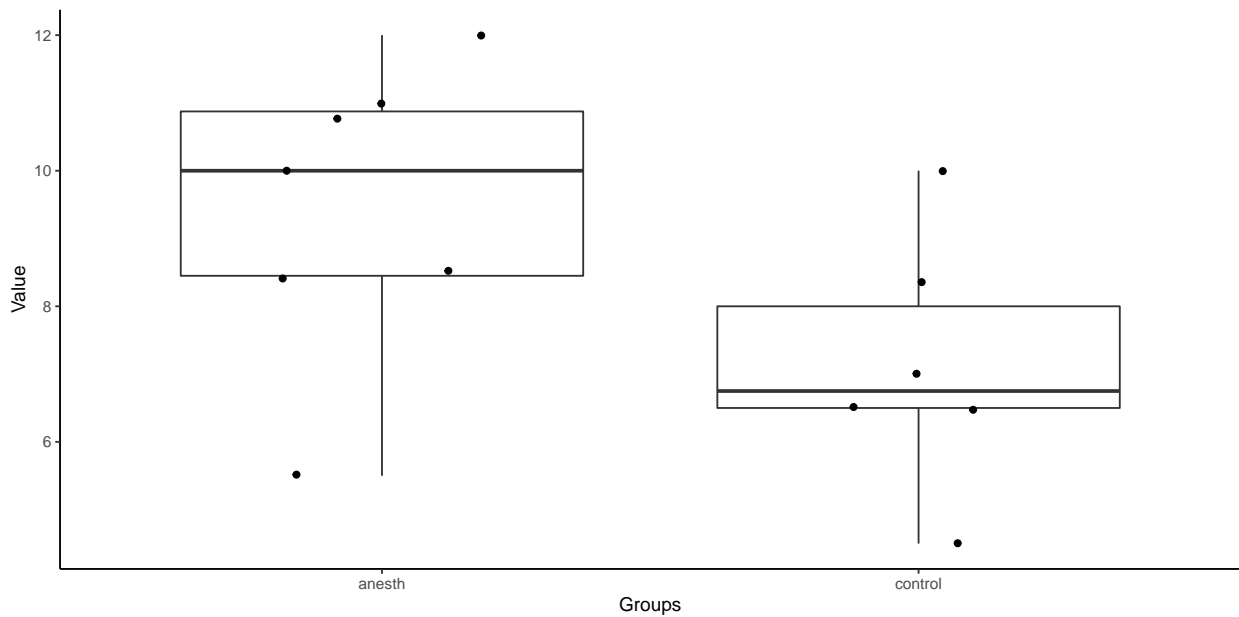

```
## 1. Normality assumption test by Shapiro_Wilk test is
## p = 0.811
## Normality assumption was not rejected
## 2. Equal variance test by Bartlett test is
## p = 0.730
## Equal variance assumption was not rejected
## 3. The result of anova is
## p = 0.067
## A statistically significant difference do not exist between groups
##
```

# Data analysis using R

Boohwi Hong

```
## Present data is ** Fig4_C.action_potential_60_Male.csv **  
##  
## ** Data structure **  
## 'data.frame': 13 obs. of 4 variables:  
## $ subject : int 1 2 3 4 5 6 7 8 9 10 ...  
## $ group : chr "control" "control" "control" "control" ...  
## $ input.current : int 60 60 60 60 60 60 60 60 60 60 ...  
## $ action.potential: num 8 8 7 11.5 10 9.2 9.5 12.5 8.5 10.6 ...  
##  
## ** Explorative data analysis with graphics**
```

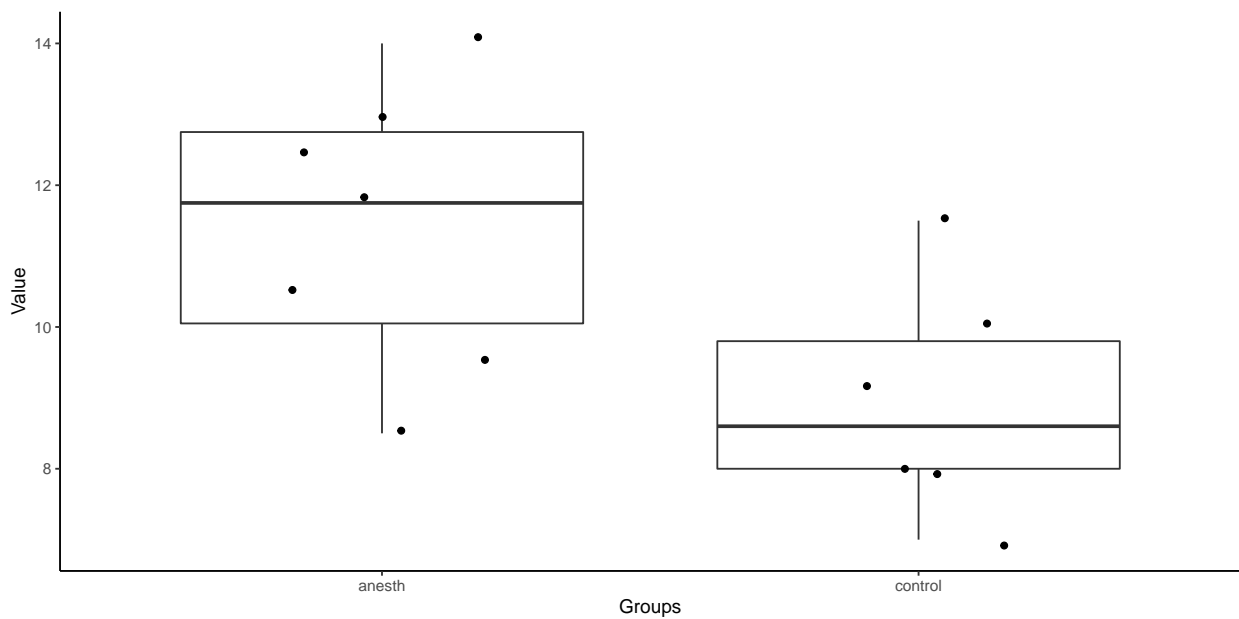

```
## 1. Normality assumption test by Shapiro_Wilk test is  
## p = 0.712  
## Normality assumption was not rejected  
## 2. Equal variance test by Bartlett test is  
## p = 0.673  
## Equal variance assumption was not rejected  
## 3. The result of anova is  
## p = 0.034  
## A statistically significant difference exist between groups  
##  
## Tukey multiple comparisons of means  
## 95% family-wise confidence level
```

```
##
## Fit: aov(formula = d1[, 4] ~ d1[, 2], data = d1)
##
## $`d1[, 2]`
##           diff           lwr
## control-anesth -2.457143 -4.690366
##                upr           p adj
## control-anesth -0.2239201 0.0339063
```



# Data analysis using R

Boohwi Hong

```
## Present data is ** Fig4_C.action_potential_70_Male.csv **
##
## ** Data structure **
## 'data.frame':  13 obs. of  4 variables:
## $ subject      : int  1 2 3 4 5 6 7 8 9 10 ...
## $ group        : chr  "control" "control" "control" "control" ...
## $ input.current : int  70 70 70 70 70 70 70 70 70 70 ...
## $ action.potential: num  10.5 10.5 9 11.5 11.7 ...
##
## ** Explorative data analysis with graphics**
```

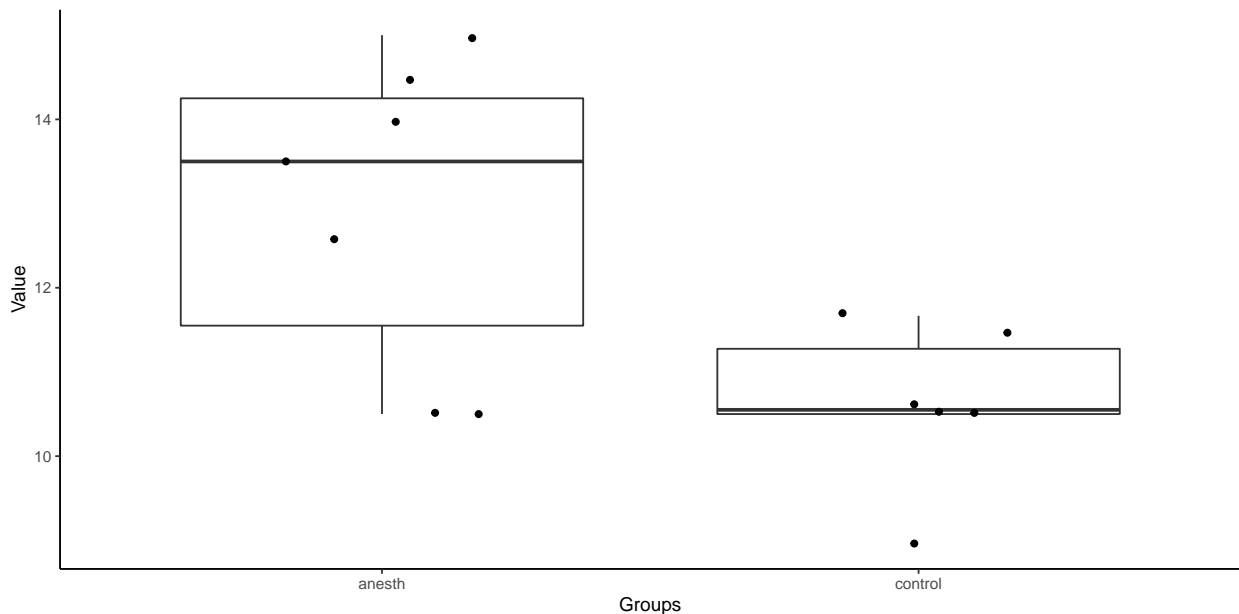

```
## 1. Normality assumption test by Shapiro_Wilk test is
## p = 0.278
## Normality assumption was not rejected
## 2. Equal variance test by Bartlett test is
## p = 0.164
## Equal variance assumption was not rejected
## 3. The result of anova is
## p = 0.018
## A statistically significant difference exist between groups
##
## Tukey multiple comparisons of means
## 95% family-wise confidence level
```

```
##
## Fit: aov(formula = d1[, 4] ~ d1[, 2], data = d1)
##
## $`d1[, 2]`
##           diff      lwr
## control-anesth -2.315079 -4.14852
##                upr      p adj
## control-anesth -0.4816377 0.0179303
```

# Data analysis using R

Boohwi Hong

```
## Present data is ** Fig4_C.action_potential_80_Male.csv **
##
## ** Data structure **
## 'data.frame': 13 obs. of 4 variables:
## $ subject : int 1 2 3 4 5 6 7 8 9 10 ...
## $ group : chr "control" "control" "control" "control" ...
## $ input.current : int 80 80 80 80 80 80 80 80 80 80 ...
## $ action.potential: num 11.5 11.5 10.5 11.5 12.7 ...
##
## ** Explorative data analysis with graphics**
```

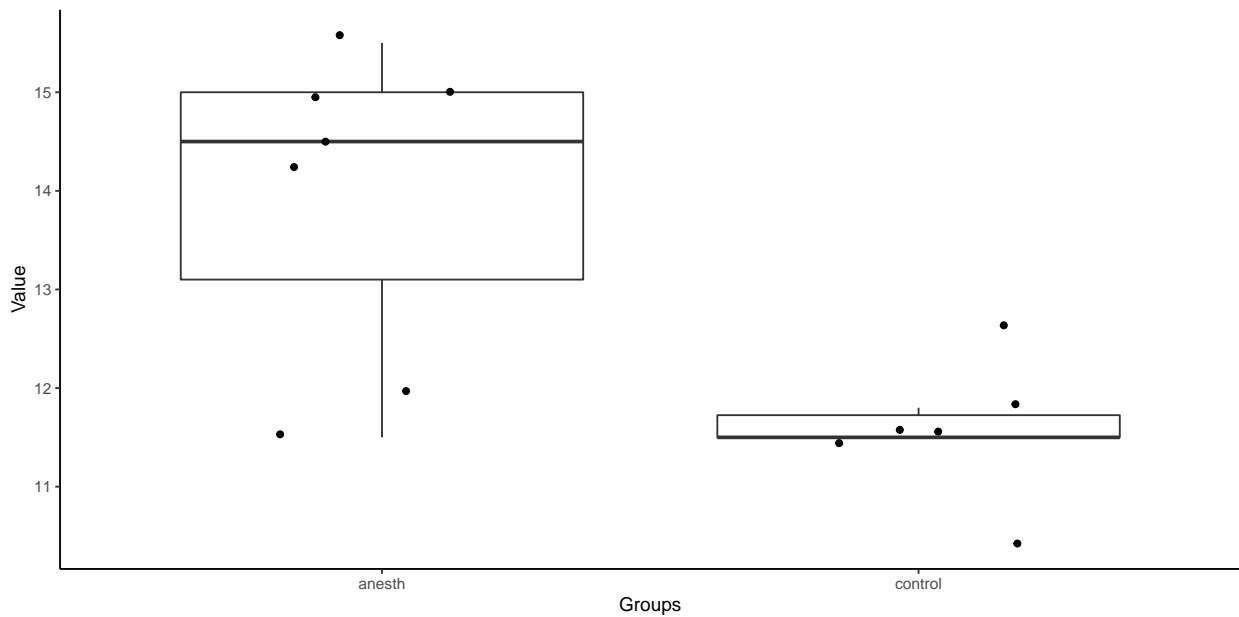

```
## 1. Normality assumption test by Shapiro_Wilk test is
## p = 0.157
## Normality assumption was not rejected
## 2. Equal variance test by Bartlett test is
## p = 0.090
## Equal variance assumption was not rejected
## 3. The result of anova is
## p = 0.006
## A statistically significant difference exist between groups
##
## Tukey multiple comparisons of means
## 95% family-wise confidence level
```

```
##  
## Fit: aov(formula = d1[, 4] ~ d1[, 2], data = d1)  
##  
## $`d1[, 2]`  
##           diff      lwr  
## control-anesth -2.379365 -3.910207  
##           upr      p adj  
## control-anesth -0.8485219 0.0057136
```



```
##
## Fit: aov(formula = d1[, 4] ~ d1[, 2], data = d1)
##
## $`d1[, 2]`
##           diff          lwr
## control-anesth -2.56746 -4.161027
##                upr          p adj
## control-anesth -0.9738927 0.0045834
```

# Data analysis using R

Boohwi Hong

```
## Present data is ** Fig4_C.action_potential_100_Male.csv **
##
## ** Data structure **
## 'data.frame': 13 obs. of 4 variables:
## $ subject : int 1 2 3 4 5 6 7 8 9 10 ...
## $ group : chr "control" "control" "control" "control" ...
## $ input.current : int 100 100 100 100 100 100 100 100 100 100 ...
## $ action.potential: num 13 13 13 11 14 13.4 12.5 17 14 16.2 ...
##
## ** Explorative data analysis with graphics**
```

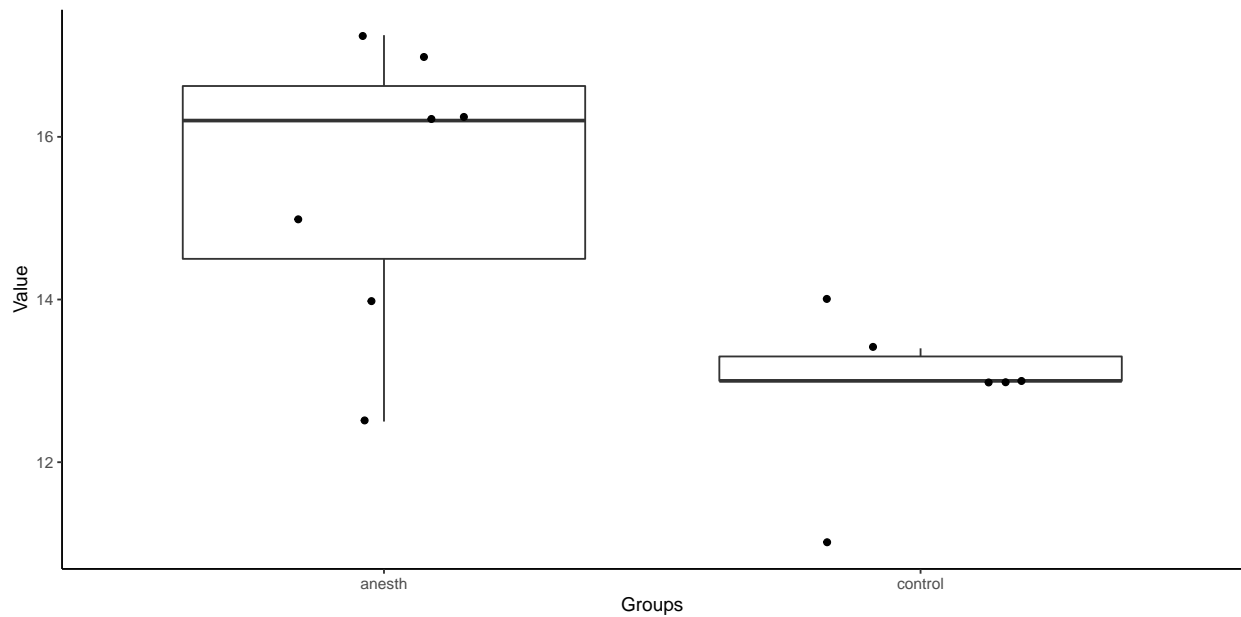

```
## 1. Normality assumption test by Shapiro_Wilk test is
## p = 0.31
## Normality assumption was not rejected
## 2. Equal variance test by Bartlett test is
## p = 0.249
## Equal variance assumption was not rejected
## 3. The result of anova is
## p = 0.009
## A statistically significant difference exist between groups
##
## Tukey multiple comparisons of means
## 95% family-wise confidence level
```

```
##
## Fit: aov(formula = d1[, 4] ~ d1[, 2], data = d1)
##
## $`d1[, 2]`
##           diff          lwr
## control-anesth -2.557143 -4.325946
##                upr          p adj
## control-anesth -0.78834 0.0087309
```





```
##
## Fit: aov(formula = d1[, 4] ~ d1[, 2], data = d1)
##
## $`d1[, 2]`
##           diff          lwr
## control-anesth -2.580952 -4.847641
##                upr          p adj
## control-anesth -0.3142639 0.0291861
```

# Data analysis using R

Boohwi Hong

```
## Present data is ** Fig4_D.sEPSC_amplitude_Male.csv **  
##  
## ** Data structure **  
## 'data.frame': 15 obs. of 3 variables:  
## $ subject: int 1 2 3 4 5 6 7 8 9 10 ...  
## $ group : chr "control" "control" "control" "control" ...  
## $ amplitude : num 22.7 22.8 17.5 13.4 25.4 ...  
##  
## ** Explorative data analysis with graphics**
```

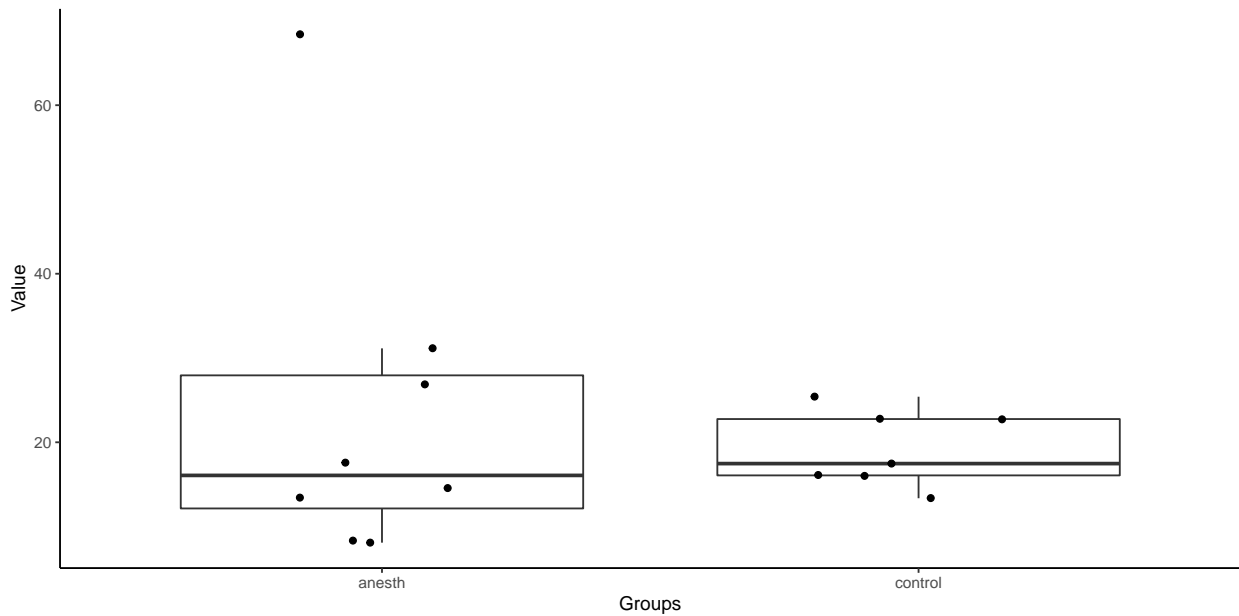

```
## 1. Normality assumption test by Shapiro_Wilk test is  
## p = 0.002  
## Normality assumption was rejected  
## 2. The result of Kruskal_Wallis test:  
## p = 0.908  
## A statistically significant difference do not exist between groups  
##
```

# Data analysis using R

Boohwi Hong

```
## Present data is ** Fig4_D.sEPSC_freq_Male.csv **
##
## ** Data structure **
## 'data.frame': 15 obs. of 3 variables:
## $ subject: int 1 2 3 4 5 6 7 8 9 10 ...
## $ group : chr "control" "control" "control" "control" ...
## $ freq : num 0.0333 0.15 0.3833 0.2611 0.1708 ...
##
## ** Explorative data analysis with graphics**
```

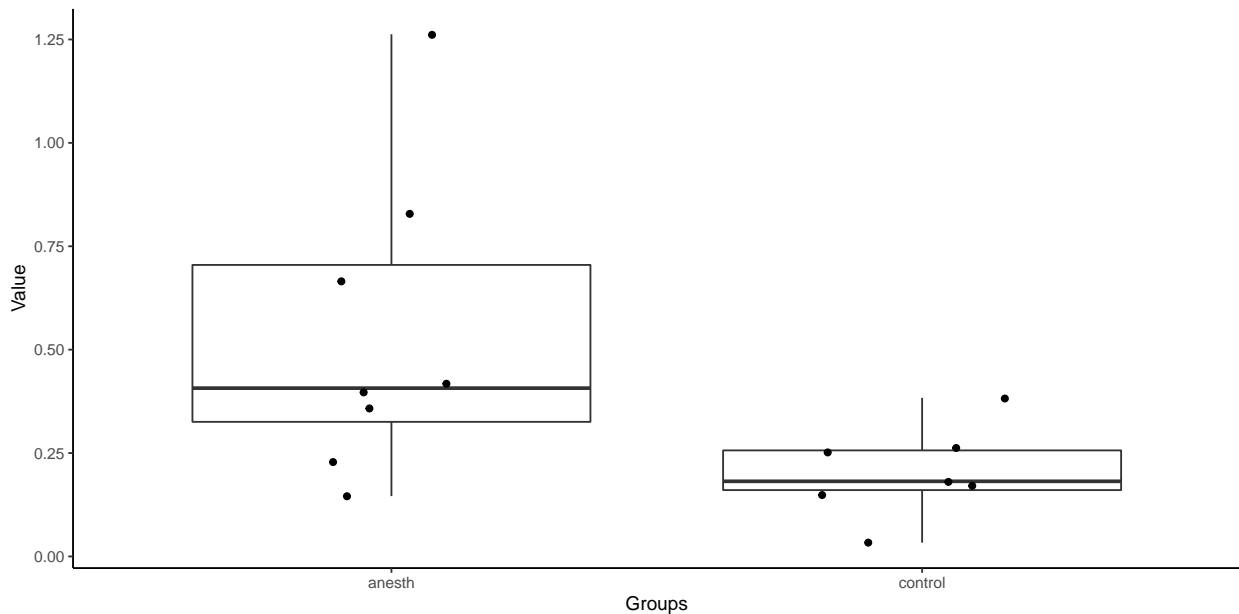

```
## 1. Normality assumption test by Shapiro_Wilk test is
## p = 0.149
## Normality assumption was not rejected
## 2. Equal variance test by Bartlett test is
## p = 0.009
## Equal variance assumption was rejected
## 3. The result of Welch ANOVA is
## p = 0.039
## A statistically significant difference exist between groups
##
## Tukey multiple comparisons of means
## 95% family-wise confidence level
##
```

```
## Fit: aov(formula = d1[, 3] ~ d1[, 2])
##
## $`d1[, 2]`
##           diff          lwr
## control-anesth -0.3327977 -0.6450026
##                upr          p adj
## control-anesth -0.02059275 0.0384539
```

# Data analysis using R

Boohwi Hong

```
## Present data is ** Fig4_E.sIPSC_amplitude_Male.csv **
##
## ** Data structure **
## 'data.frame':  14 obs. of  3 variables:
## $  subject: int  1 2 3 4 5 6 7 8 9 10 ...
## $  group   : chr  "control" "control" "control" "control" ...
## $  amp     : num  67.1 47.1 54.3 37.2 34.1 ...
##
## ** Explorative data analysis with graphics**

## Warning: Removed 2 rows containing non-finite
## values (stat_boxplot).

## Warning: Removed 2 rows containing missing
## values (geom_point).
```

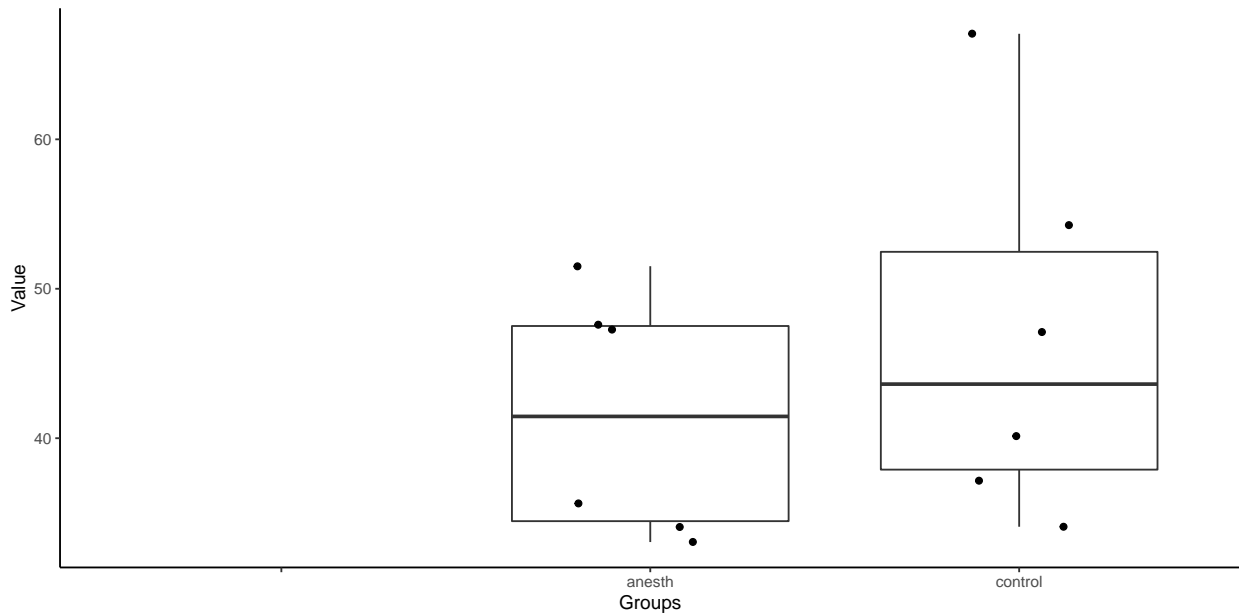

```
## 1. Normality assumption test by Shapiro_Wilk test is
## p = 0.291
## Normality assumption was not rejected
## 2. Equal variance test by Bartlett test is
## p = 0.379
## Equal variance assumption was not rejected
## 3. The result of anova is
```

```
## p = 0.418
## A statistically significant difference do not exist between groups
##
```

# Data analysis using R

Boohwi Hong

```
## Present data is ** Fig4_E.sIPSC_freq_Male.csv **
##
## ** Data structure **
## 'data.frame':  14 obs. of  3 variables:
## $  subject: int  1 2 3 4 5 6 7 8 9 10 ...
## $  group   : chr  "control" "control" "control" "control" ...
## $  freq    : num  9.45 8.43 11.12 10.45 12.64 ...
##
## ** Explorative data analysis with graphics**

## Warning: Removed 2 rows containing non-finite
## values (stat_boxplot).

## Warning: Removed 2 rows containing missing
## values (geom_point).
```

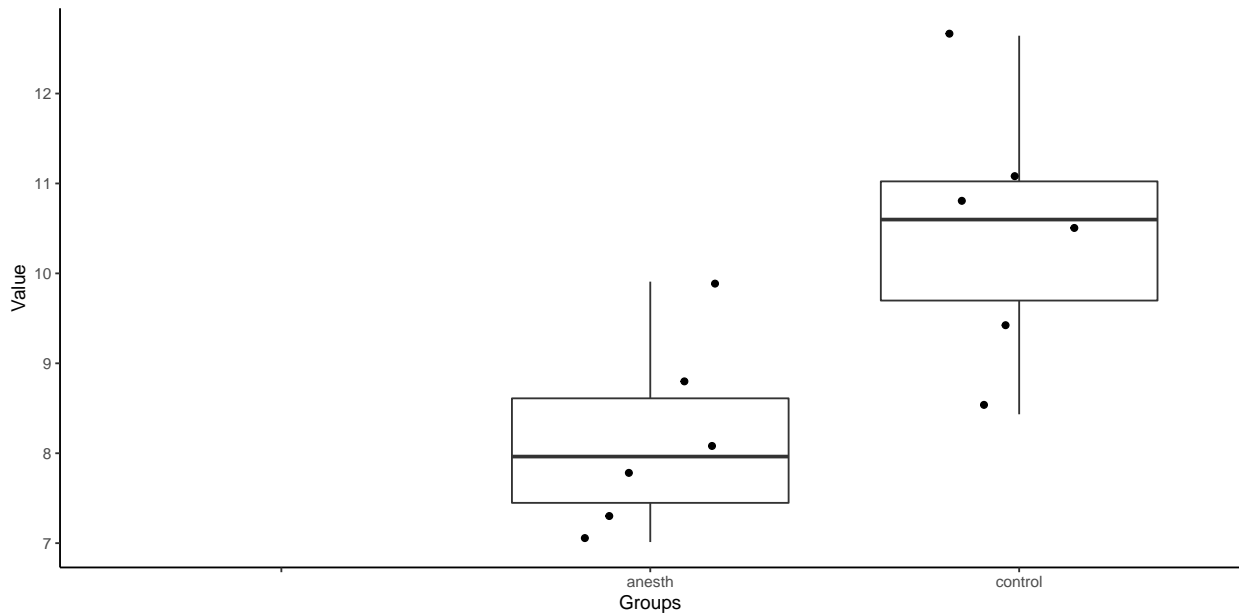

```
## 1. Normality assumption test by Shapiro_Wilk test is
## p = 0.959
## Normality assumption was not rejected
## 2. Equal variance test by Bartlett test is
## p = 0.507
## Equal variance assumption was not rejected
## 3. The result of anova is
```



```
## p = 0.010
## A statistically significant difference exist between groups
##
## Tukey multiple comparisons of means
## 95% family-wise confidence level
##
## Fit: aov(formula = d1[, 3] ~ d1[, 2], data = d1)
##
## $`d1[, 2]`
##           diff          lwr
## control-anesth 2.314447 0.6888304
##           upr          p adj
## control-anesth 3.940064 0.0099491
```

# Data analysis using R

Boohwi Hong

```
## Present data is ** Fig4_F.sAP_freq_Male.csv **
##
## ** Data structure **
## 'data.frame':  14 obs. of  3 variables:
## $ subject: int  1 2 3 4 5 6 7 8 9 10 ...
## $ group   : chr  "control" "control" "control" "control" ...
## $ freq    : num  0 0.000833 0 0.000667 0.000333 ...
##
## ** Explorative data analysis with graphics**

## Warning: Removed 2 rows containing non-finite
## values (stat_boxplot).

## Warning: Removed 2 rows containing missing
## values (geom_point).
```

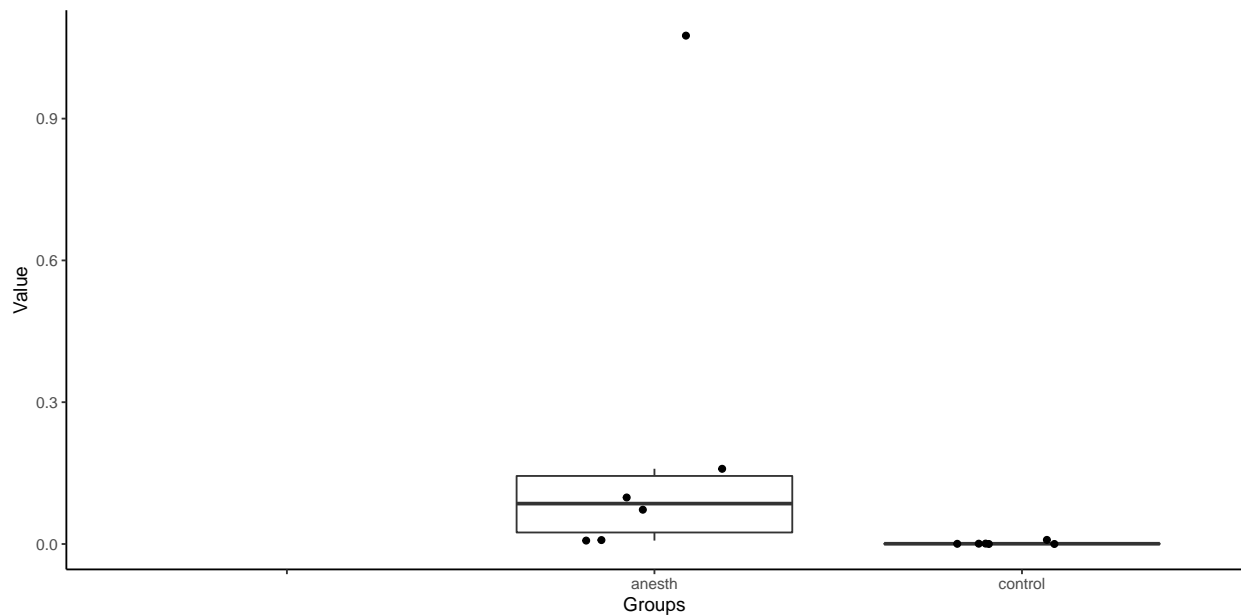

```
## 1. Normality assumption test by Shapiro_Wilk test is
## p = 0.000
## Normality assumption was rejected
## 2. The result of Kruskal-Wallis test:
## p = 0.010
## A statistically significant difference exist between groups
##
```

# Supplementary Note 5

The results of statistical  
analysis for Figure 5

# Fig5\_A.kata-CPP\_Anesthesia\_Female Data analysis using R

Boohwi Hong

## Statistical Result

```
## Present data is ** Fig5_A.kata-CPP_Anesthesia_Female.csv ** ##  
## ** Data structure **  
## 'data.frame': 54 obs. of 3 variables:  
## $ subject : int 1 2 3 4 5 6 7 8 9 10 ...  
## $ group : chr "pre" "pre" "pre" "pre" ...  
## $ duration: num 370 249 279 236 259 ...  
##  
## ** Explorative data analysis with graphics**
```

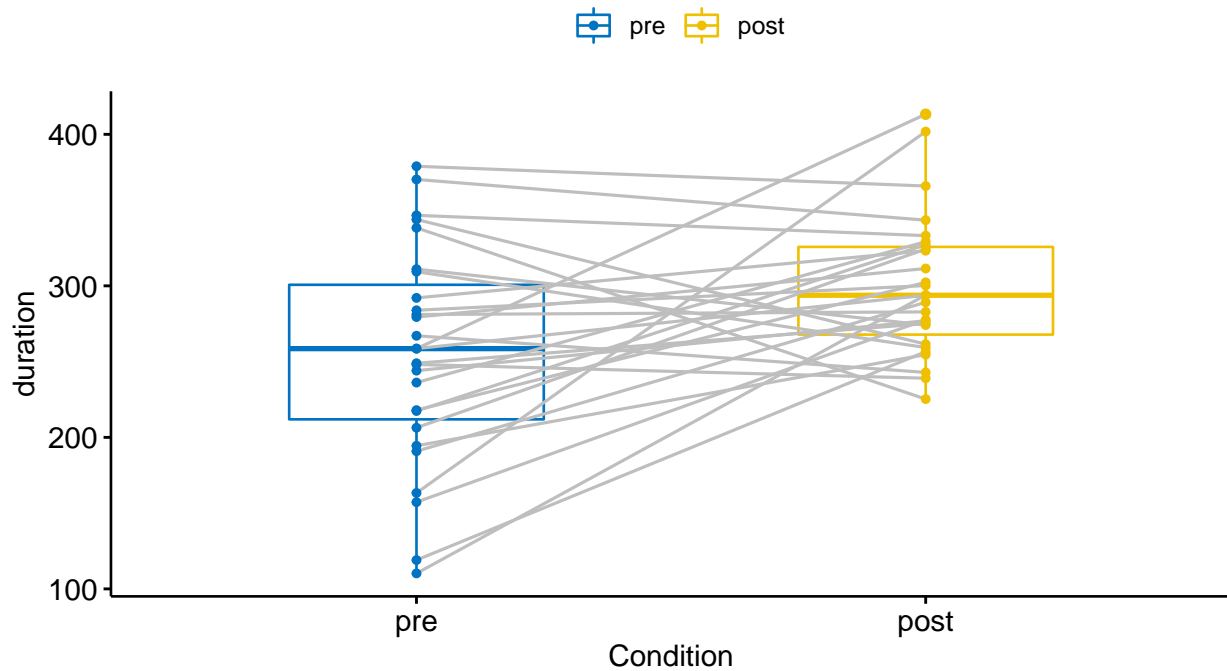

```
## 1. Normality assumption test by Shapiro_Wilk test is  
## p = 0.647  
## Normality assumption was not rejected  
## 2. The result of paired t-test is  
## p = 0.010  
## A statistically significant difference exist between groups
```

# Fig5\_A.kata-CPP\_Control\_Female Data analysis using R

Boohwi Hong

## Statistical Result

```
## Present data is ** Fig5_A.kata-CPP_Control_Female.csv ** ##  
## ** Data structure **  
## 'data.frame': 50 obs. of 3 variables:  
## $ subject: int 1 2 3 4 5 6 7 8 9 10 ...  
## $ group : chr "pre" "pre" "pre" "pre" ...  
## $ duration : num 215 334 133 200 232 ...  
##  
## ** Explorative data analysis with graphics**
```

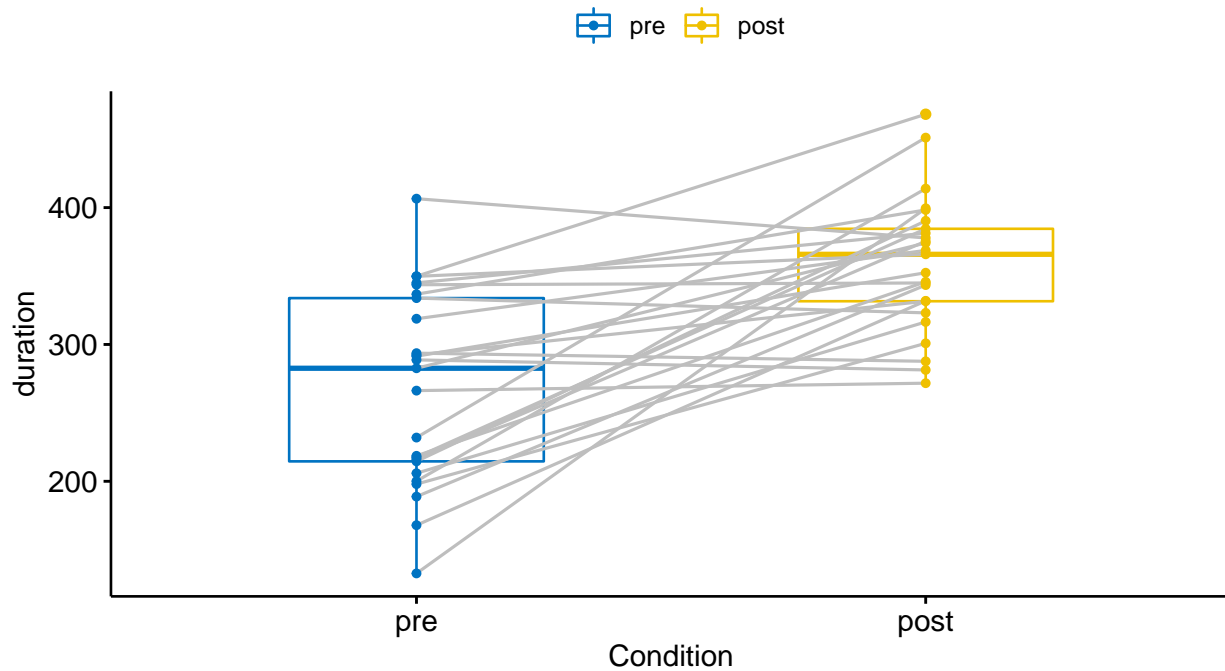

```
## 1. Normality assumption test by Shapiro_Wilk test is  
## p = 0.882  
## Normality assumption was not rejected  
## 2. The result of paired t-test is  
## p = 0.000  
## A statistically significant difference exist between groups
```

# Fig5\_B.keta-CPP\_CPPscore\_Female Data analysis using R

Boohwi Hong

```
## Present data is ** Fig5_B.keta-CPP_CPPscore_Female.csv ** ##  
## ** Data structure **
```

```
## 'data.frame': 52 obs. of 3 variables:  
## $ subject: int 1 2 3 4 5 6 7 8 9 10 ...  
## $ group : chr "control" "control" "control" "control" ...  
## $ difference: num 175.8 -10.8 266.8 213.7 219.2 ...  
##  
## ** Explorative data analysis with graphics**
```

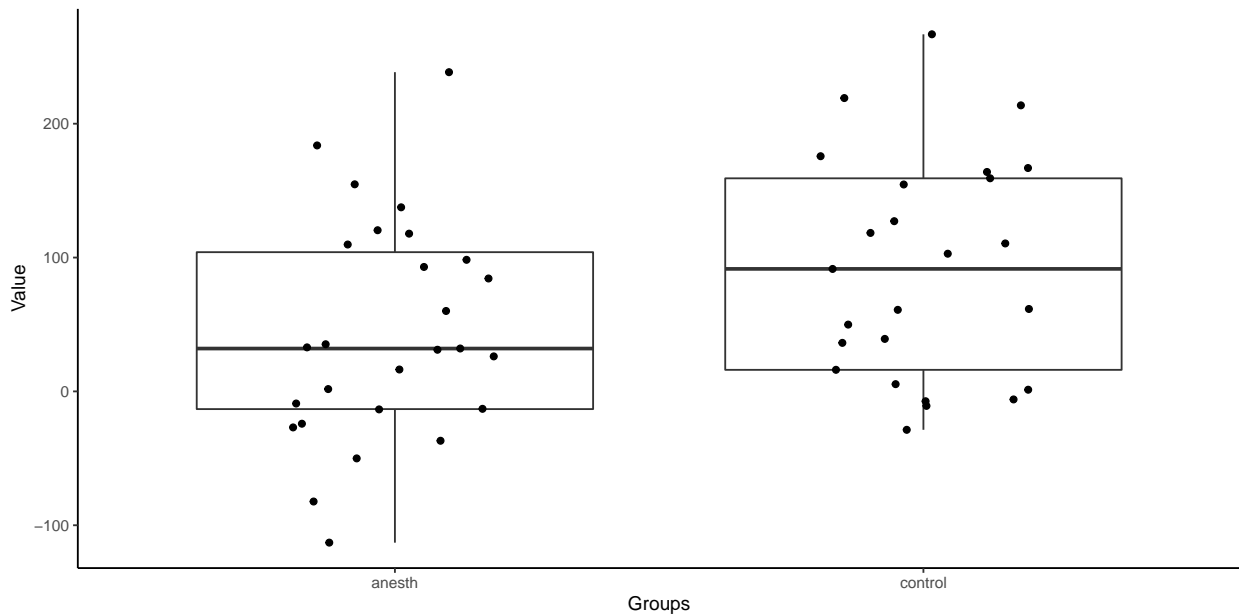

```
## 1. Normality assumption test by Shapiro_Wilk test is  
## p = 0.398  
## Normality assumption was not rejected  
## 2. Equal variance test by Bartlett test is  
## p = 1.000  
## Equal variance assumption was not rejected  
## 3. The result of anova is  
## p = 0.047  
## A statistically significant difference exist between groups  
##  
## Tukey multiple comparisons of means  
## 95% family-wise confidence level  
##
```

```
## Fit: aov(formula = d1[, 3] ~ d1[, 2], data = d1)
##
## $`d1[, 2]`
##           diff           lwr           upr           p adj
## control-anesth 46.9187 0.5823843 93.25502 0.0472947
```

# Data analysis using R

Boohwi Hong

```
## Present data is ** Fig5_C.action_potential_20_Female.csv **
##
## ** Data structure **
## 'data.frame':  12 obs. of  4 variables:
## $ subject      : int  1 2 3 4 5 6 7 8 9 10 ...
## $ group        : chr  "control" "control" "control" "control" ...
## $ input.current : int  20 20 20 20 20 20 20 20 20 20 ...
## $ action.potential: num  0 0 0 0 2.75 0 0 0 0 0 ...
##
## ** Explorative data analysis with graphics**
```

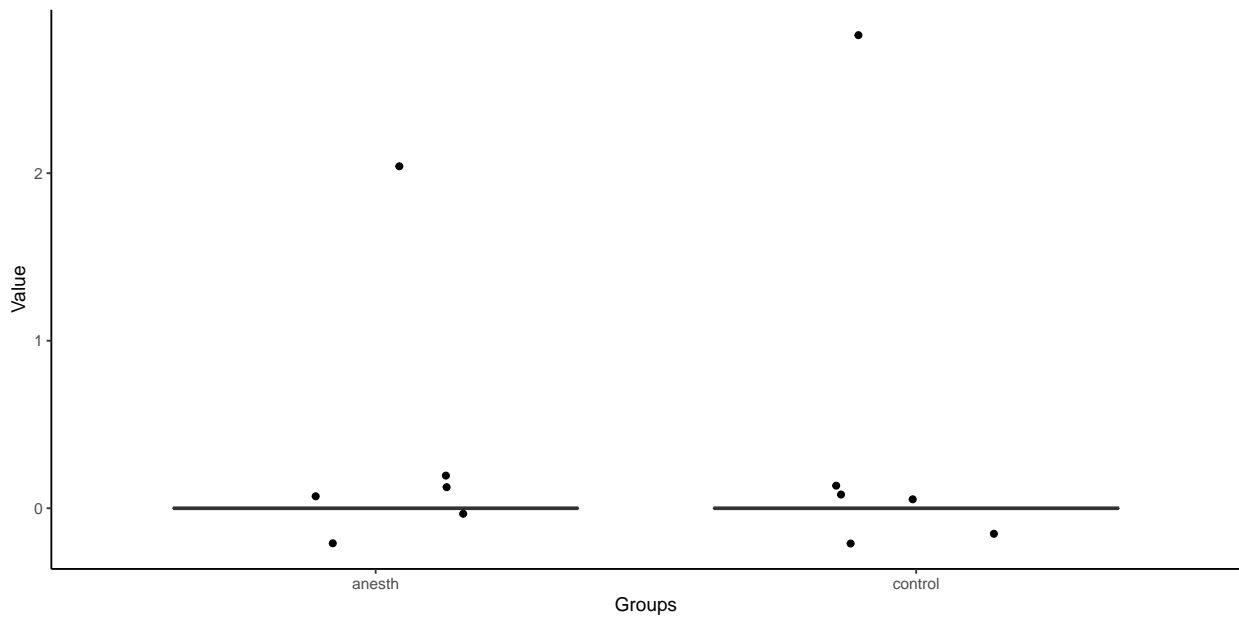

```
## 1. Normality assumption test by Shapiro_Wilk test is
## p = 0.000
## Normality assumption was rejected
## 2. The result of Kruskal_Wallis test:
## p = 0.902
## A statistically significant difference do not exist between groups
##
```



# Data analysis using R

Boohwi Hong

```
## Present data is ** Fig5_C.action_potential_30_Female.csv **
##
## ** Data structure **
## 'data.frame': 12 obs. of 4 variables:
## $ subject : int 1 2 3 4 5 6 7 8 9 10 ...
## $ group : chr "control" "control" "control" "control" ...
## $ input.current : int 30 30 30 30 30 30 30 30 30 30 ...
## $ action.potential: num 0 0 0 2.2 7.5 2.6 0 1 0 2.4 ...
##
## ** Explorative data analysis with graphics**
```

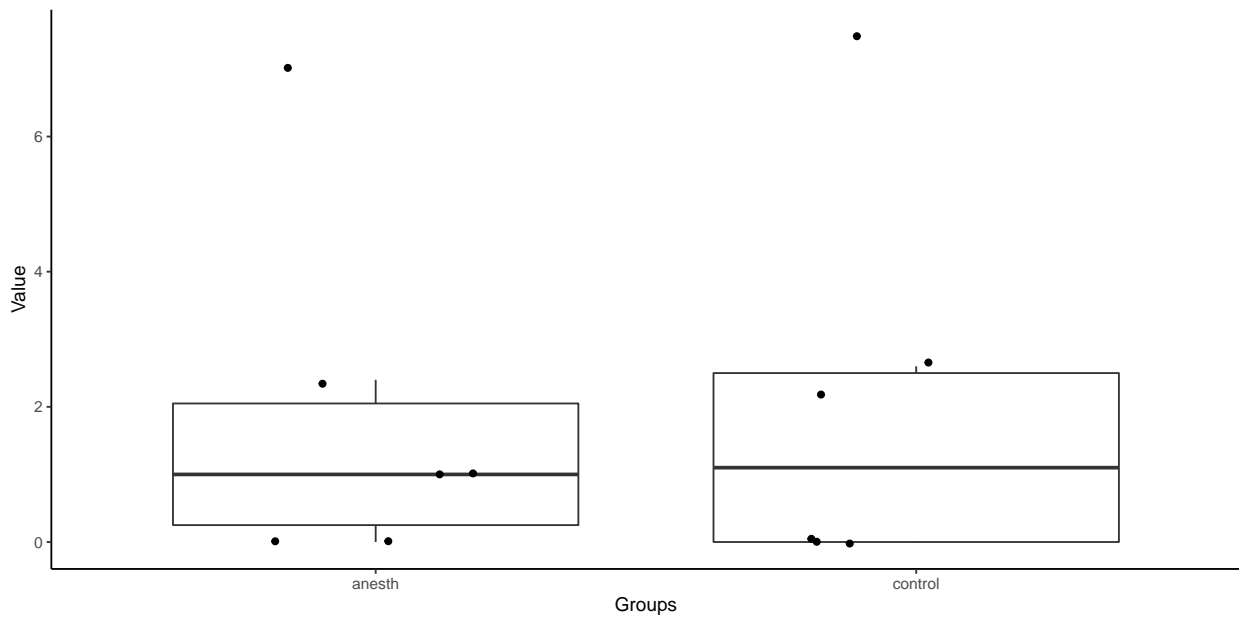

```
## 1. Normality assumption test by Shapiro_Wilk test is
## p = 0.003
## Normality assumption was rejected
## 2. The result of Kruskal_Wallis test:
## p = 1.000
## A statistically significant difference do not exist between groups
##
```

# Data analysis using R

Boohwi Hong

```
## Present data is ** Fig5_C.action_potential_40_Female.csv **  
##  
## ** Data structure **  
## 'data.frame': 12 obs. of 4 variables:  
## $ subject : int 1 2 3 4 5 6 7 8 9 10 ...  
## $ group : chr "control" "control" "control" "control" ...  
## $ input.current : int 40 40 40 40 40 40 40 40 40 40 ...  
## $ action.potential: num 4 3 5.5 5 10.5 6.4 4 4 1 5.8 ...  
##  
## ** Explorative data analysis with graphics**
```

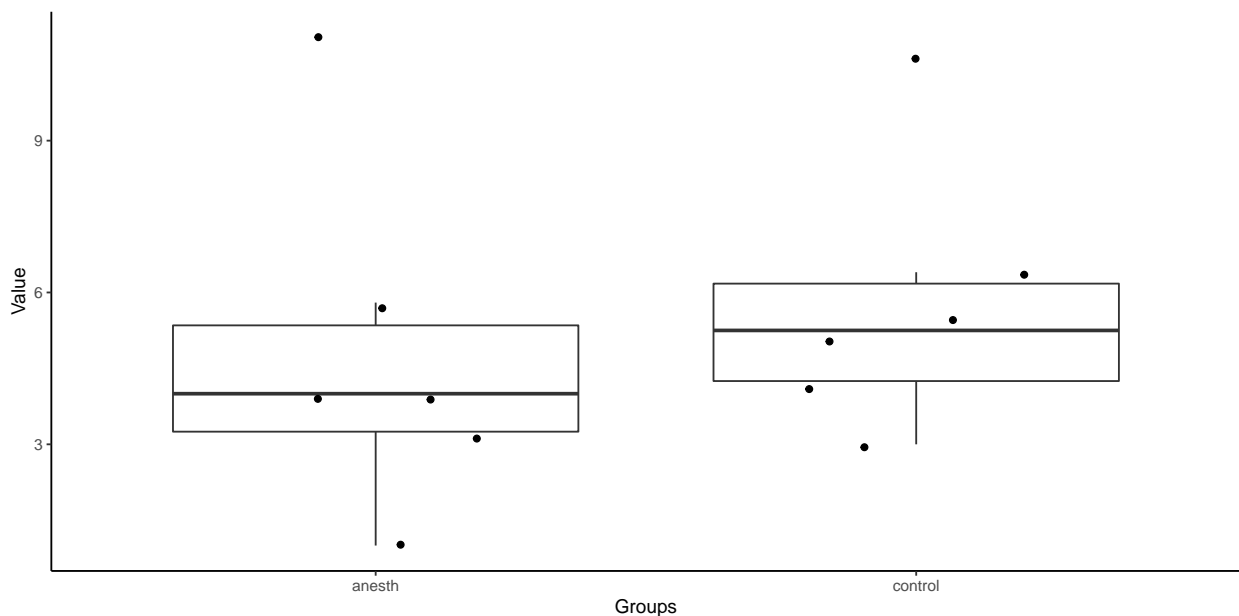

```
## 1. Normality assumption test by Shapiro_Wilk test is  
## p = 0.106  
## Normality assumption was not rejected  
## 2. Equal variance test by Bartlett test is  
## p = 0.571  
## Equal variance assumption was not rejected  
## 3. The result of anova is  
## p = 0.607  
## A statistically significant difference do not exist between groups  
##
```

# Data analysis using R

Boohwi Hong

```
## Present data is ** Fig5_C.action_potential_50_Female.csv **
##
## ** Data structure **
## 'data.frame':  12 obs. of  16 variables:
## $ subject      : int  1 2 3 4 5 6 7 8 9 10 ...
## $ group        : chr  "control" "control" "control" "control" ...
## $ input.current : int  50 50 50 50 50 50 50 50 50 50 ...
## $ action.potential: num  8 7 9.5 9.4 13 10.2 7.5 8 5.5 8 ...
## $ X            : logi  NA NA NA NA NA NA ...
## $ X.1          : logi  NA NA NA NA NA NA ...
## $ X.2          : logi  NA NA NA NA NA NA ...
## $ X.3          : logi  NA NA NA NA NA NA ...
## $ X.4          : logi  NA NA NA NA NA NA ...
## $ X.5          : logi  NA NA NA NA NA NA ...
## $ X.6          : logi  NA NA NA NA NA NA ...
## $ X.7          : logi  NA NA NA NA NA NA ...
## $ X.8          : logi  NA NA NA NA NA NA ...
## $ X.9          : logi  NA NA NA NA NA NA ...
## $ X.10         : logi  NA NA NA NA NA NA ...
## $ X.11         : logi  NA NA NA NA NA NA ...
##
## ** Explorative data analysis with graphics**
```

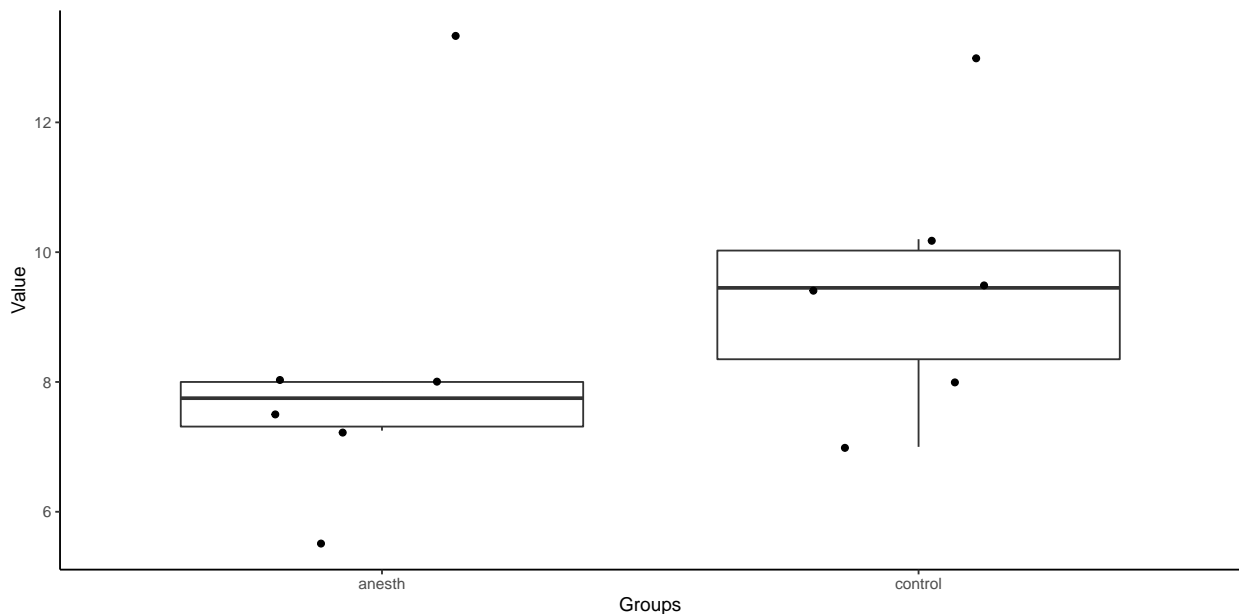

```
## 1. Normality assumption test by Shapiro_Wilk test is
```

```
## p = 0.074
## Normality assumption was not rejected
## 2. Equal variance test by Bartlett test is
## p = 0.595
## Equal variance assumption was not rejected
## 3. The result of anova is
## p = 0.382
## A statistically significant difference do not exist between groups
##
```

# Data analysis using R

Boohwi Hong

```
## Present data is ** Fig5_C.action_potential_60_Female.csv **  
##  
## ** Data structure **  
## 'data.frame': 12 obs. of 4 variables:  
## $ subject : int 1 2 3 4 5 6 7 8 9 10 ...  
## $ group : chr "control" "control" "control" "control" ...  
## $ input.current : int 60 60 60 60 60 60 60 60 60 60 ...  
## $ action.potential: num 10.5 10 12 12.4 13.8 ...  
##  
## ** Explorative data analysis with graphics**
```

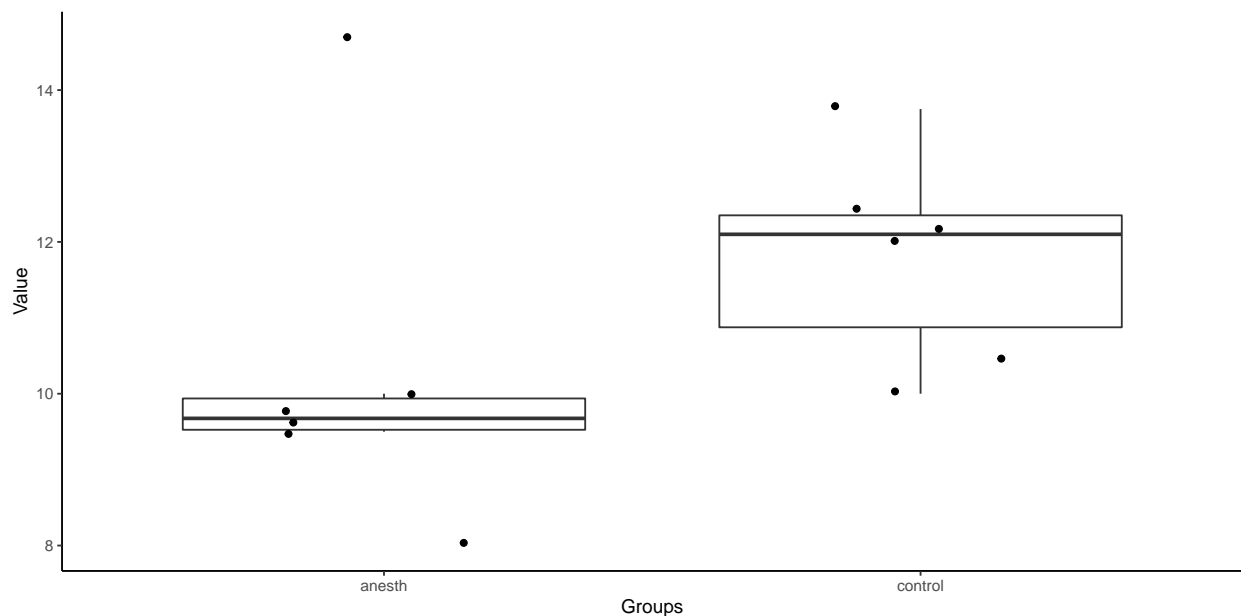

```
## 1. Normality assumption test by Shapiro_Wilk test is  
## p = 0.137  
## Normality assumption was not rejected  
## 2. Equal variance test by Bartlett test is  
## p = 0.285  
## Equal variance assumption was not rejected  
## 3. The result of anova is  
## p = 0.181  
## A statistically significant difference do not exist between groups  
##
```

# Data analysis using R

Boohwi Hong

```
## Present data is ** Fig5_C.action_potential_70_Female.csv **  
##  
## ** Data structure **  
## 'data.frame': 12 obs. of 4 variables:  
## $ subject : int 1 2 3 4 5 6 7 8 9 10 ...  
## $ group : chr "control" "control" "control" "control" ...  
## $ input.current : int 70 70 70 70 70 70 70 70 70 70 ...  
## $ action.potential: num 12.5 12 14 14 15 13.6 11 12 9.5 11.4 ...  
##  
## ** Explorative data analysis with graphics**
```

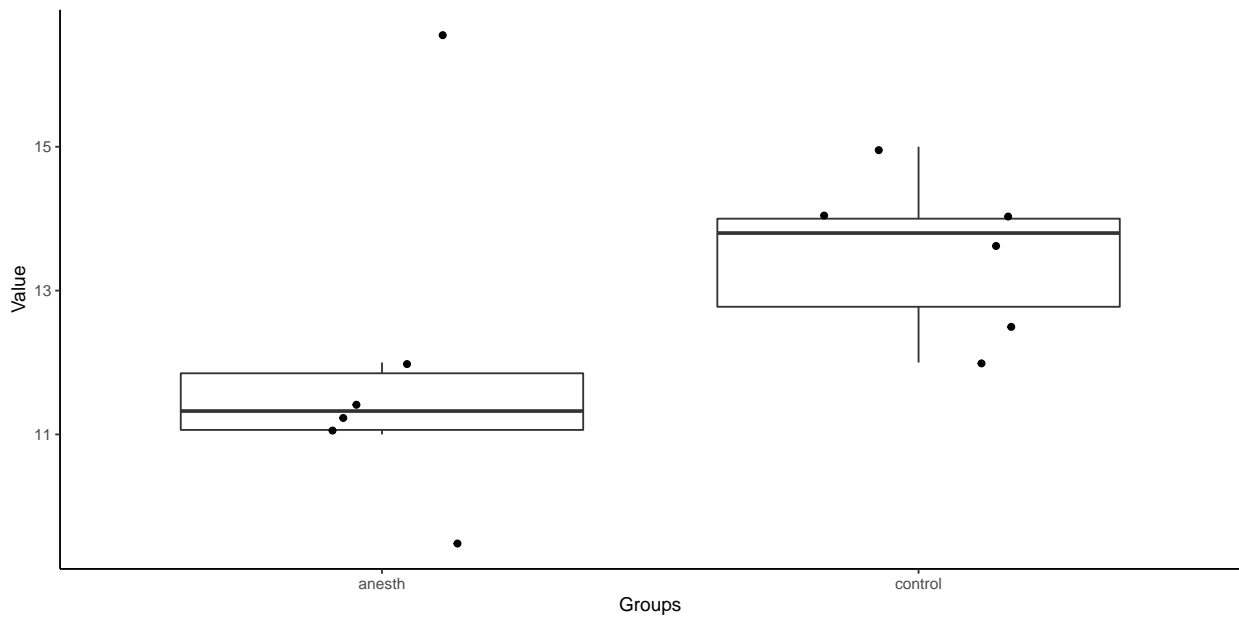

```
## 1. Normality assumption test by Shapiro_Wilk test is  
## p = 0.084  
## Normality assumption was not rejected  
## 2. Equal variance test by Bartlett test is  
## p = 0.114  
## Equal variance assumption was not rejected  
## 3. The result of anova is  
## p = 0.172  
## A statistically significant difference do not exist between groups  
##
```

# Data analysis using R

Boohwi Hong

```
## Present data is ** Fig5_C.action_potential_80_Female.csv **
##
## ** Data structure **
## 'data.frame':  12 obs. of  4 variables:
## $ subject      : int  1 2 3 4 5 6 7 8 9 10 ...
## $ group        : chr  "control" "control" "control" "control" ...
## $ input.current : int  80 80 80 80 80 80 80 80 80 80 ...
## $ action.potential: num  13.5 13.5 15 15.8 15.2 ...
##
## ** Explorative data analysis with graphics**
```

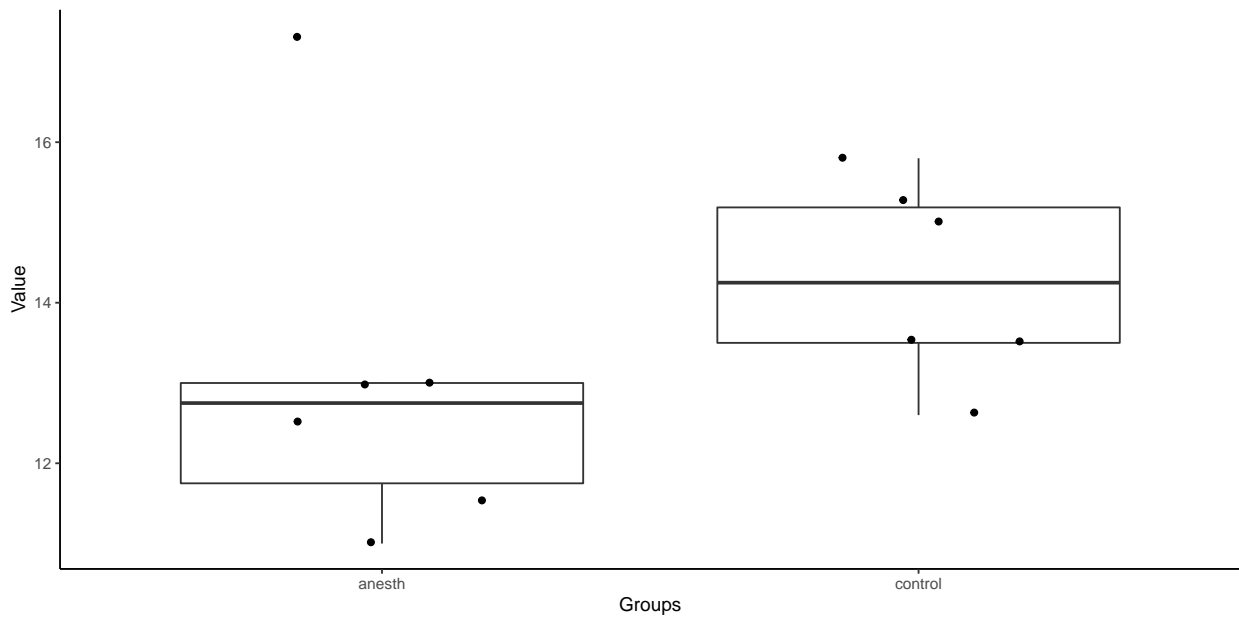

```
## 1. Normality assumption test by Shapiro_Wilk test is
## p = 0.143
## Normality assumption was not rejected
## 2. Equal variance test by Bartlett test is
## p = 0.223
## Equal variance assumption was not rejected
## 3. The result of anova is
## p = 0.272
## A statistically significant difference do not exist between groups
##
```

# Data analysis using R

Boohwi Hong

```
## Present data is ** Fig5_C.action_potential_90_Female.csv **
##
## ** Data structure **
## 'data.frame':  12 obs. of  4 variables:
## $ subject      : int  1 2 3 4 5 6 7 8 9 10 ...
## $ group        : chr  "control" "control" "control" "control" ...
## $ input.current : int  90 90 90 90 90 90 90 90 90 90 ...
## $ action.potential: num  14.5 14.5 16 17.2 16 15.6 12.5 14 11.5 14.2 ...
##
## ** Explorative data analysis with graphics**
```

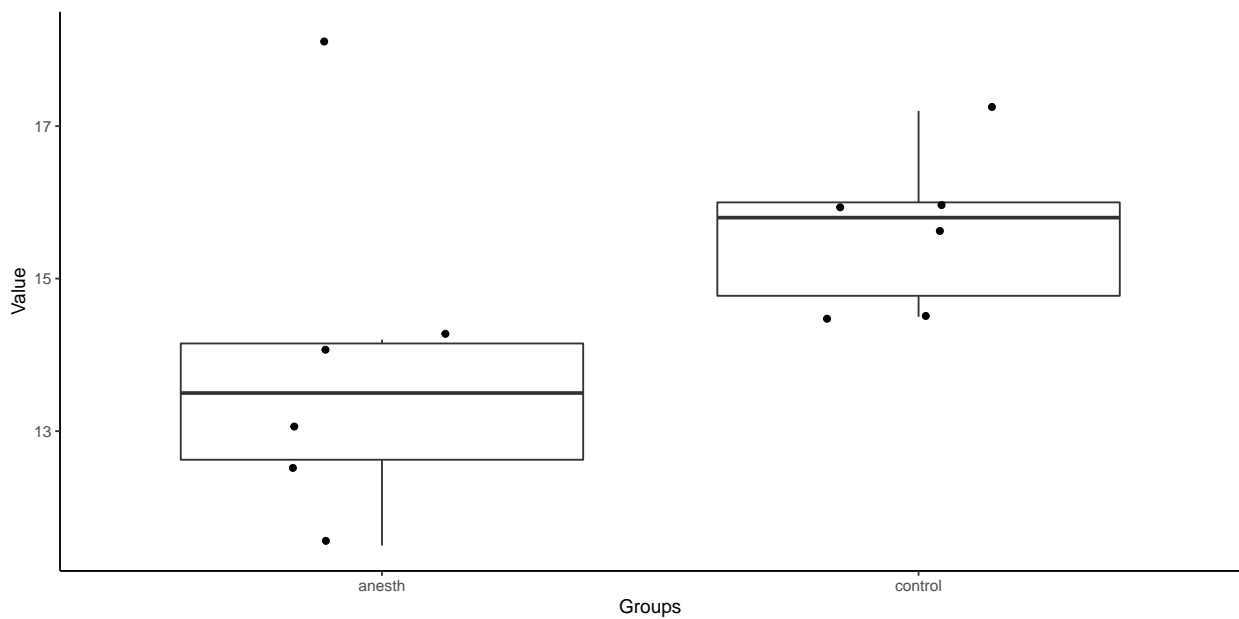

```
## 1. Normality assumption test by Shapiro_Wilk test is
## p = 0.109
## Normality assumption was not rejected
## 2. Equal variance test by Bartlett test is
## p = 0.099
## Equal variance assumption was not rejected
## 3. The result of anova is
## p = 0.124
## A statistically significant difference do not exist between groups
##
```



# Data analysis using R

Boohwi Hong

```
## Present data is ** Fig5_C.action_potential_100_Female.csv **
##
## ** Data structure **
## 'data.frame': 12 obs. of 4 variables:
## $ subject : int 1 2 3 4 5 6 7 8 9 10 ...
## $ group : chr "control" "control" "control" "control" ...
## $ input.current : int 100 100 100 100 100 100 100 100 100 100 ...
## $ action.potential: num 15.5 15.5 17 18.6 16 16.4 13.5 14.5 12.5 15.2 ...
##
## ** Explorative data analysis with graphics**
```

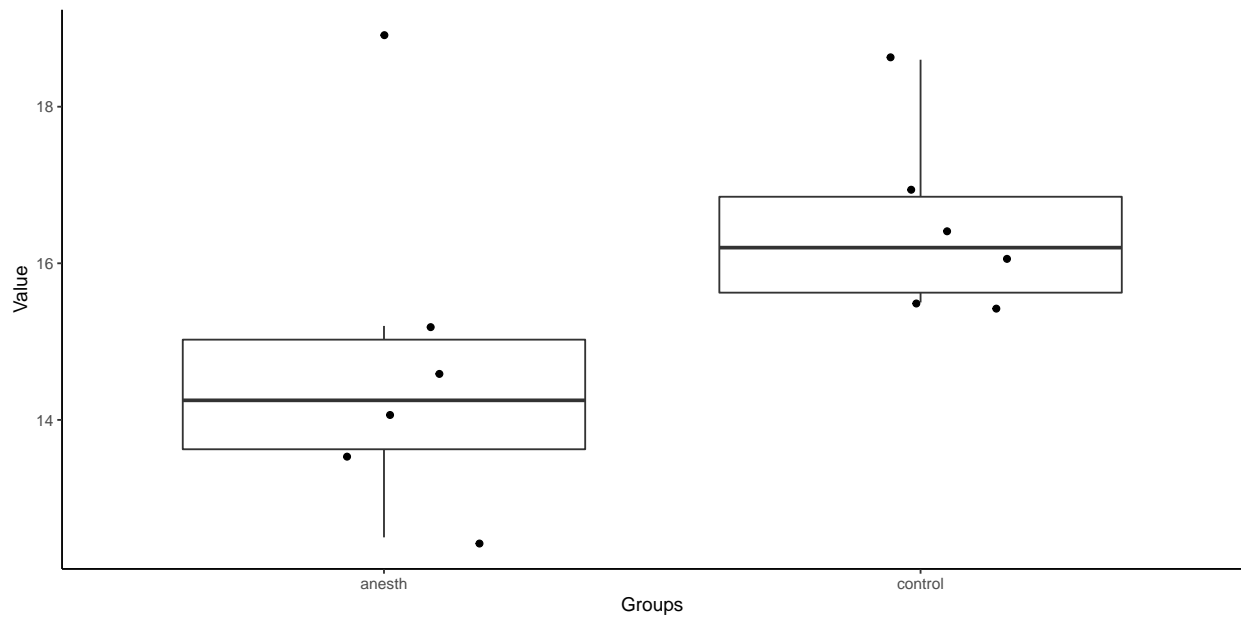

```
## 1. Normality assumption test by Shapiro_Wilk test is
## p = 0.093
## Normality assumption was not rejected
## 2. Equal variance test by Bartlett test is
## p = 0.197
## Equal variance assumption was not rejected
## 3. The result of anova is
## p = 0.117
## A statistically significant difference do not exist between groups
##
```

# Data analysis using R

Boohwi Hong

```
## Present data is ** Fig5_C.action_potential_110_Female.csv **
##
## ** Data structure **
## 'data.frame': 12 obs. of 4 variables:
## $ subject : int 1 2 3 4 5 6 7 8 9 10 ...
## $ group : chr "control" "control" "control" "control" ...
## $ input.current : int 110 110 110 110 110 110 110 110 110 110 ...
## $ action.potential: num 16.5 16 17.5 19.6 15.5 16.6 14 15 13.5 15.8 ...
##
## ** Explorative data analysis with graphics**
```

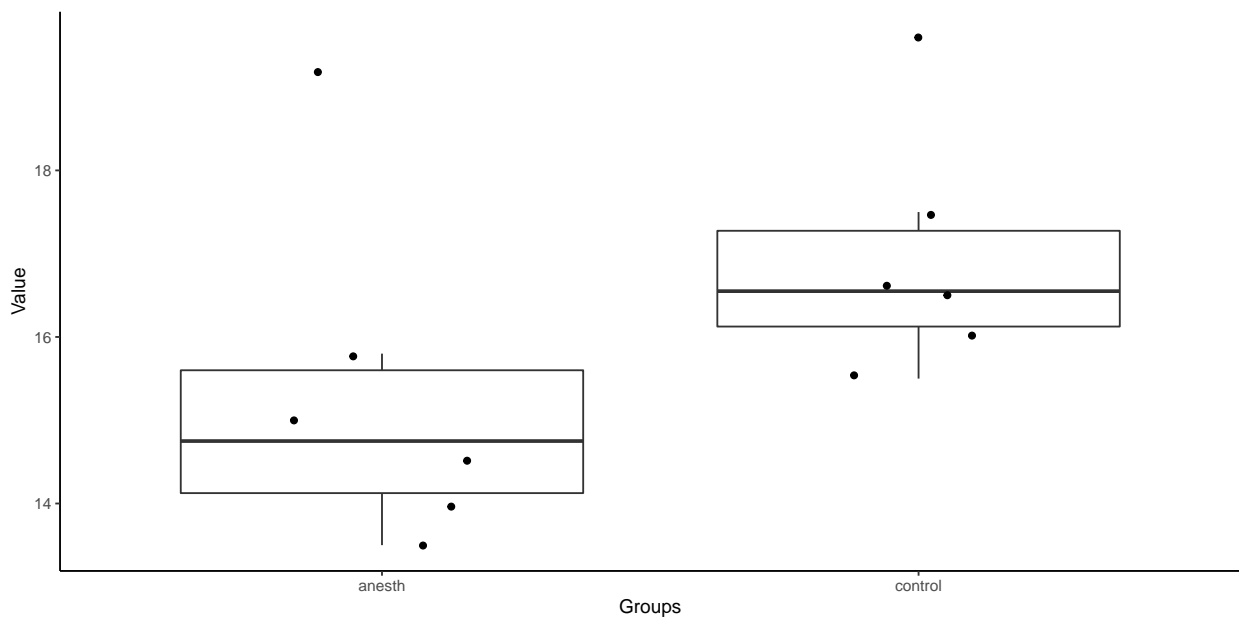

```
## 1. Normality assumption test by Shapiro_Wilk test is
## p = 0.039
## Normality assumption was rejected
## 2. The result of Kruskal_Wallis test:
## p = 0.055
## A statistically significant difference do not exist between groups
##
```

# Data analysis using R

Boohwi Hong

```
## Present data is ** Fig5_D.sEPSC_amplitude_Female.csv **  
##  
## ** Data structure **  
## 'data.frame': 15 obs. of 4 variables:  
## $ subject : int 1 2 3 4 5 6 7 8 9 10 ...  
## $ group : chr "control" "control" "control" "control" ...  
## $ amplitude: num 18.5 19.2 31.3 15.8 13.1 ...  
## $ X : logi NA NA NA NA NA NA ...  
##  
## ** Explorative data analysis with graphics**
```

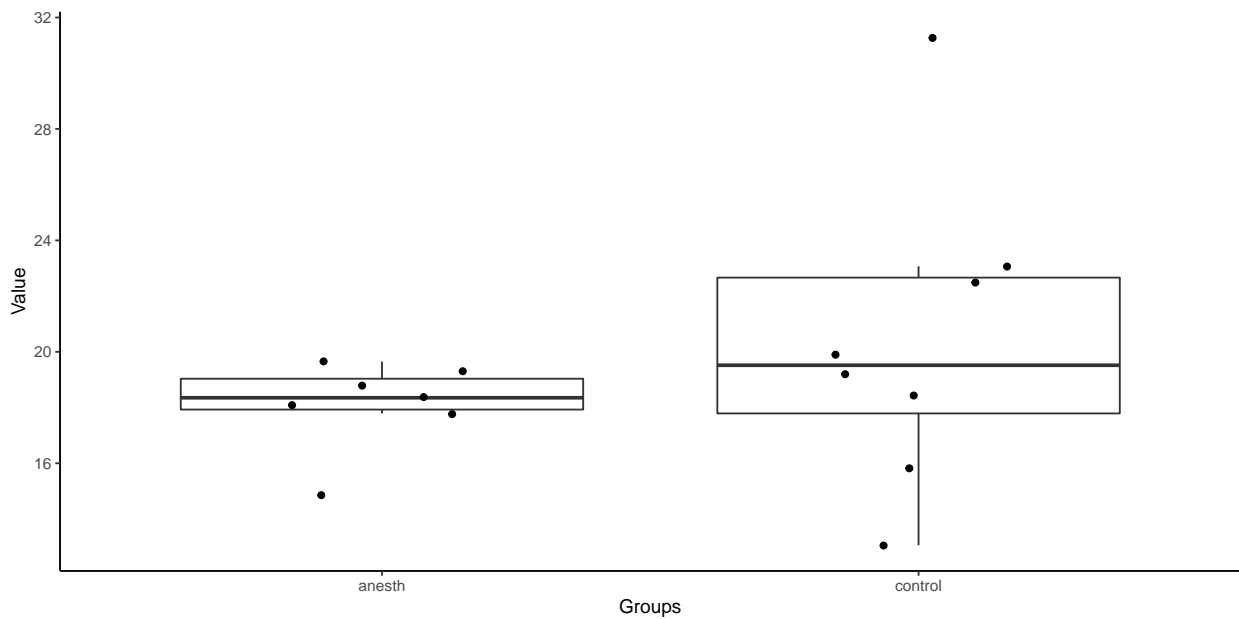

```
## 1. Normality assumption test by Shapiro_Wilk test is  
## p = 0.092  
## Normality assumption was not rejected  
## 2. Equal variance test by Bartlett test is  
## p = 0.007  
## Equal variance assumption was rejected  
## 3. The result of Welch ANOVA is  
## p = 0.290  
## A statistically significant difference do not exist between groups  
##
```

# Data analysis using R

Boohwi Hong

```
## Present data is ** Fig5_D.sEPSC_freq_Female.csv **  
##  
## ** Data structure **  
## 'data.frame': 15 obs. of 3 variables:  
## $ subject: int 1 2 3 4 5 6 7 8 9 10 ...  
## $ group : chr "control" "control" "control" "control" ...  
## $ freq : num 0.175 0.329 0.267 0.515 0.25 ...  
##  
## ** Explorative data analysis with graphics**
```

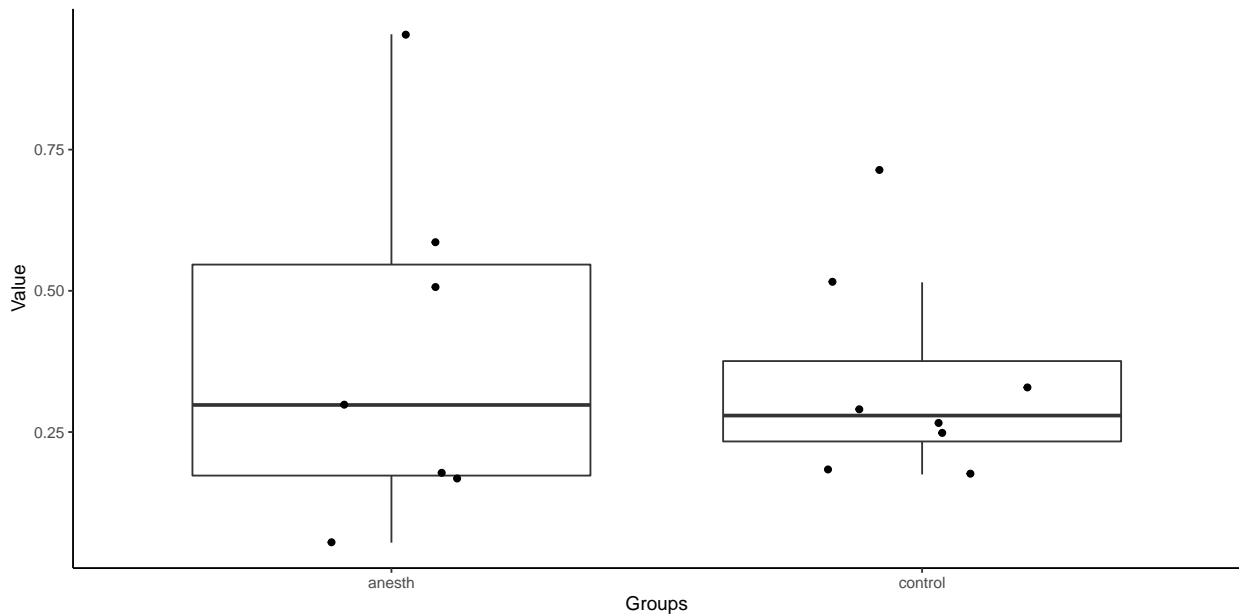

```
## 1. Normality assumption test by Shapiro_Wilk test is  
## p = 0.227  
## Normality assumption was not rejected  
## 2. Equal variance test by Bartlett test is  
## p = 0.199  
## Equal variance assumption was not rejected  
## 3. The result of anova is  
## p = 0.698  
## A statistically significant difference do not exist between groups  
##
```

# Data analysis using R

Boohwi Hong

```
## Present data is ** Fig5_E.sIPSC_amplitude_Female.csv **
##
## ** Data structure **
## 'data.frame': 15 obs. of 4 variables:
## $ subject : int 1 2 3 4 5 6 7 8 9 10 ...
## $ group : chr "control" "control" "control" "control" ...
## $ amplitude: num 56 47 49.8 34.1 38.4 ...
## $ X : logi NA NA NA NA NA NA ...
##
## ** Explorative data analysis with graphics**

## Warning: Removed 2 rows containing non-finite
## values (stat_boxplot).

## Warning: Removed 2 rows containing missing
## values (geom_point).
```

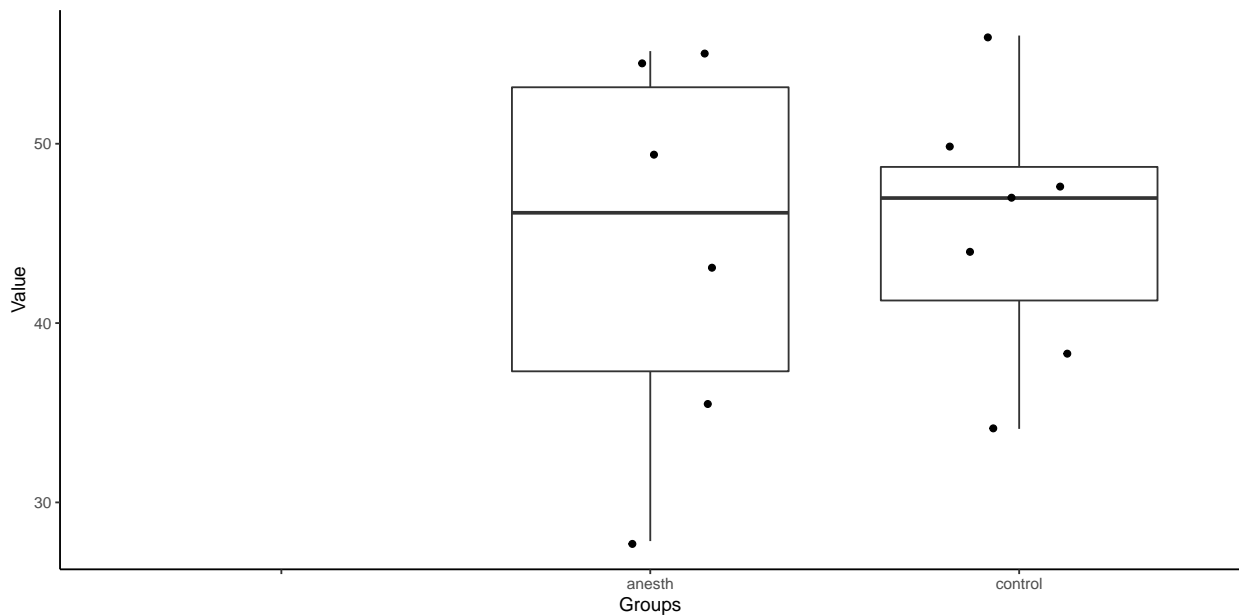

```
## 1. Normality assumption test by Shapiro_Wilk test is
## p = 0.511
## Normality assumption was not rejected
## 2. Equal variance test by Bartlett test is
## p = 0.365
## Equal variance assumption was not rejected
```

```
## 3. The result of anova is
## p = 0.833
## A statistically significant difference do not exist between groups
##
```

# Data analysis using R

Boohwi Hong

```
## Present data is ** Fig5_E.sIPSC_freq_Female.csv **
##
## ** Data structure **
## 'data.frame': 13 obs. of 4 variables:
## $ subject: int 1 2 3 4 5 6 7 8 9 10 ...
## $ group : chr "control" "control" "control" "control" ...
## $ freq : num 6.38 5.29 8.6 9.28 4.53 ...
## $ X : logi NA NA NA NA NA NA ...
##
## ** Explorative data analysis with graphics**
```

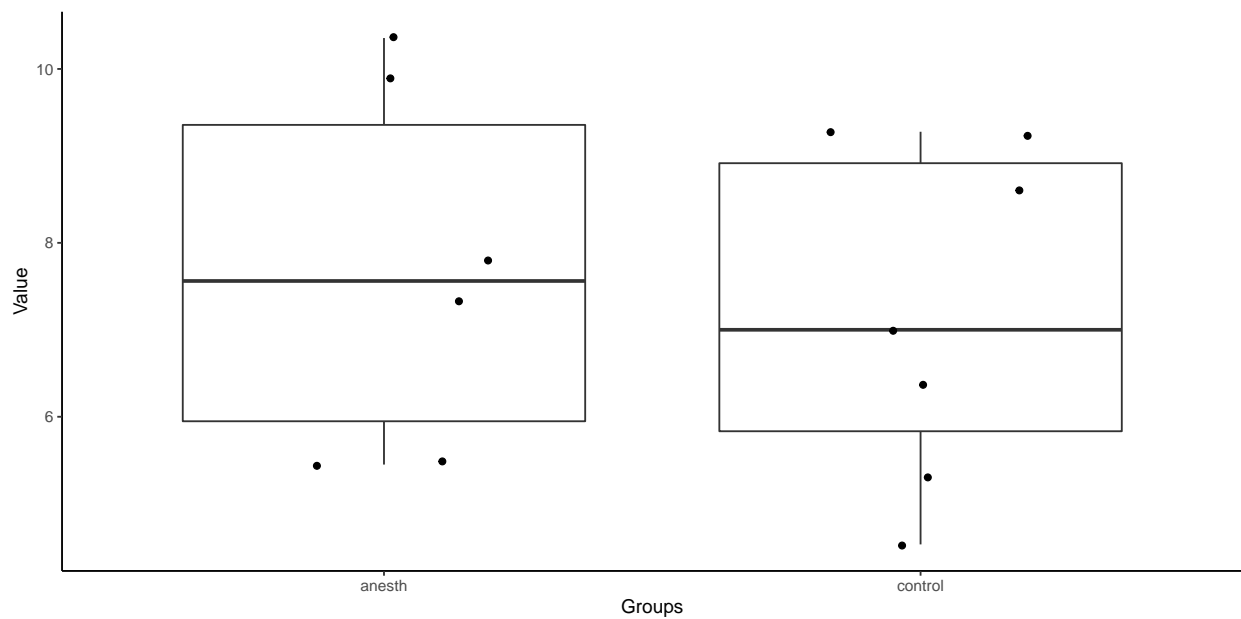

```
## 1. Normality assumption test by Shapiro_Wilk test is
## p = 0.155
## Normality assumption was not rejected
## 2. Equal variance test by Bartlett test is
## p = 0.838
## Equal variance assumption was not rejected
## 3. The result of anova is
## p = 0.643
## A statistically significant difference do not exist between groups
##
```

# Data analysis using R

Boohwi Hong

```
## Present data is ** Fig5_F.sAP_freq_Female.csv **
##
## ** Data structure **
## 'data.frame':  13 obs. of  4 variables:
## $ subject: int  1 2 3 4 5 6 7 8 9 10 ...
## $ group  : chr  "control" "control" "control" "control" ...
## $ freq   : num  0 0 0 0 0 0.000333 0.000333 0 0 0.000833 ...
## $ X     : logi  NA NA NA NA NA NA NA ...
##
## ** Explorative data analysis with graphics**
```

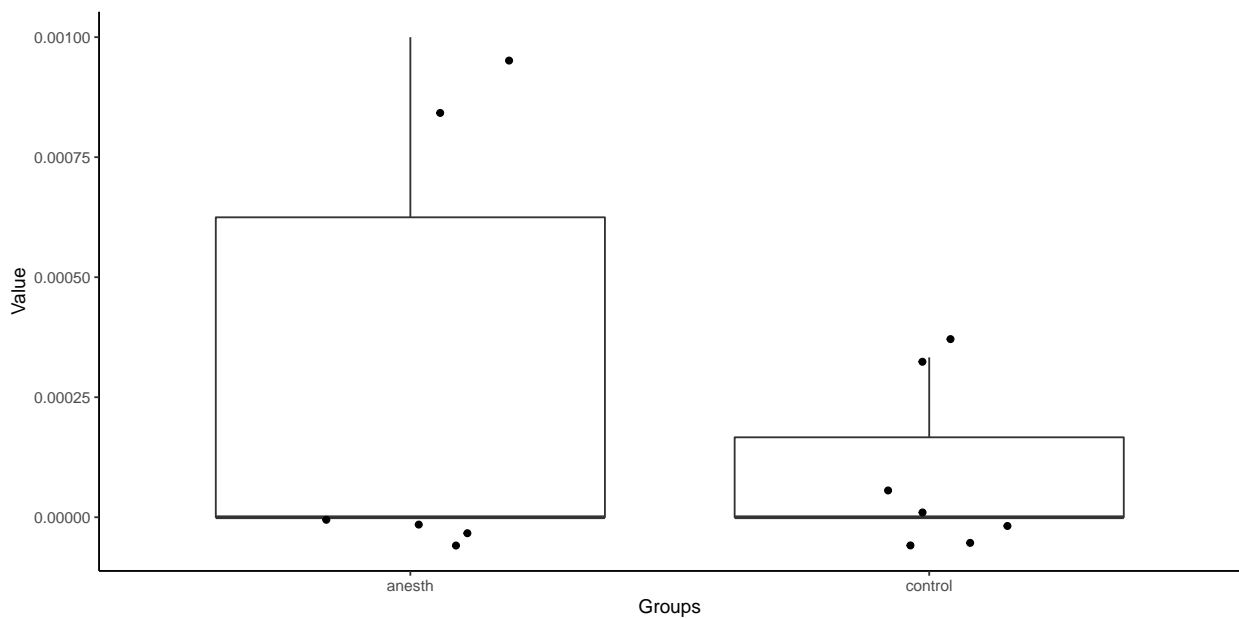

```
## 1. Normality assumption test by Shapiro_Wilk test is
## p = 0.017
## Normality assumption was rejected
## 2. The result of Kruskal_Wallis test:
## p = 0.600
## A statistically significant difference do not exist between groups
##
```



# Supplementary Note 6

The results of statistical analysis  
for Supplementary Figure 1

# Suppl\_Fig1A.CPP\_Control\_Male Data analysis using R

Boohwi Hong

## Package install

## Data import

## Data structure

```
str(d1)
```

```
## 'data.frame': 34 obs. of 3 variables:  
## $ subject : int 1 2 3 4 5 6 7 8 9 10 ...  
## $ group : chr "pre" "pre" "pre" "pre" ...  
## $ duration: num 305 296 369 265 285 ...
```

## Explorative data analysis with graphics

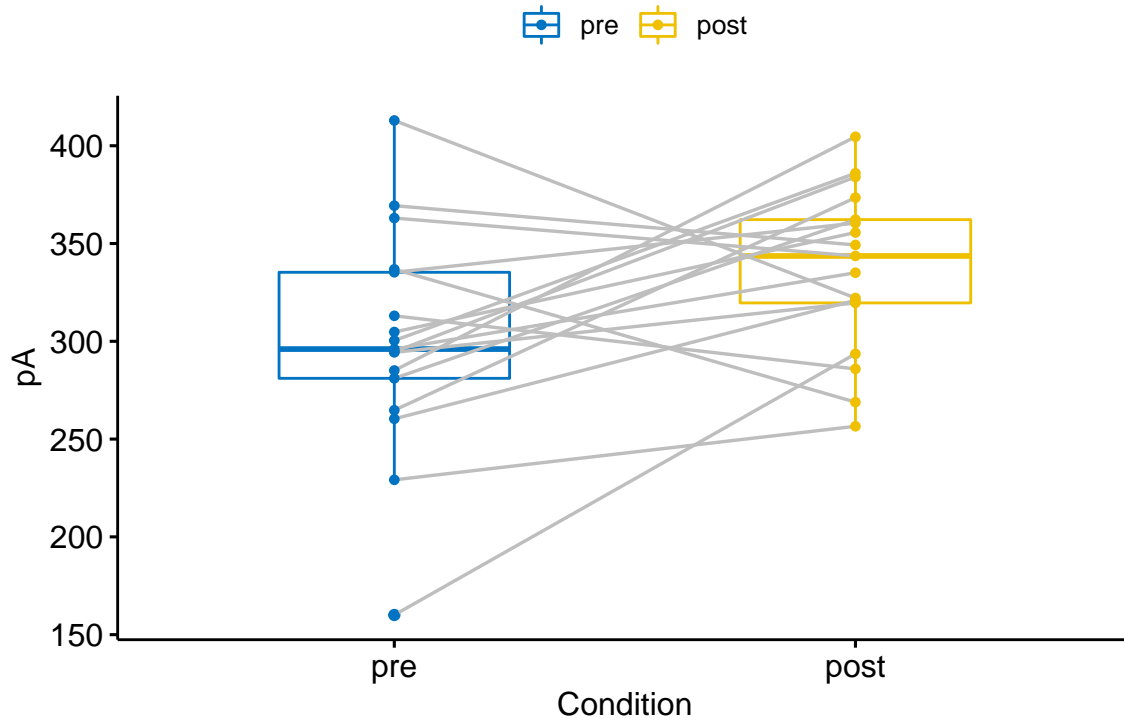

Easystat function for paired\_data developed by S. Park & B. Hong  
(available at <https://rpubs.com/koho0127>)

## Statistical Result

```
paired_easystat(d1)
```

```
## 1. Normality assumption test by Shapiro_Wilk test is  
## p = 0.791  
## Normality assumption was not rejected  
## 2. The result of paired t-test is  
## p = 0.034  
## A statistically significant difference exist between groups
```

# Suppl\_Fig1A.CPP\_Anesth\_Male Data analysis using R

Boohwi Hong

## Package install

## Data import

## Data structure

```
str(d1)
```

```
## 'data.frame': 34 obs. of 3 variables:  
## $ subject : int 1 2 3 4 5 6 7 8 9 10 ...  
## $ group : chr "pre" "pre" "pre" "pre" ...  
## $ duration: num 321 384 216 216 227 ...
```

## Explorative data analysis with graphics

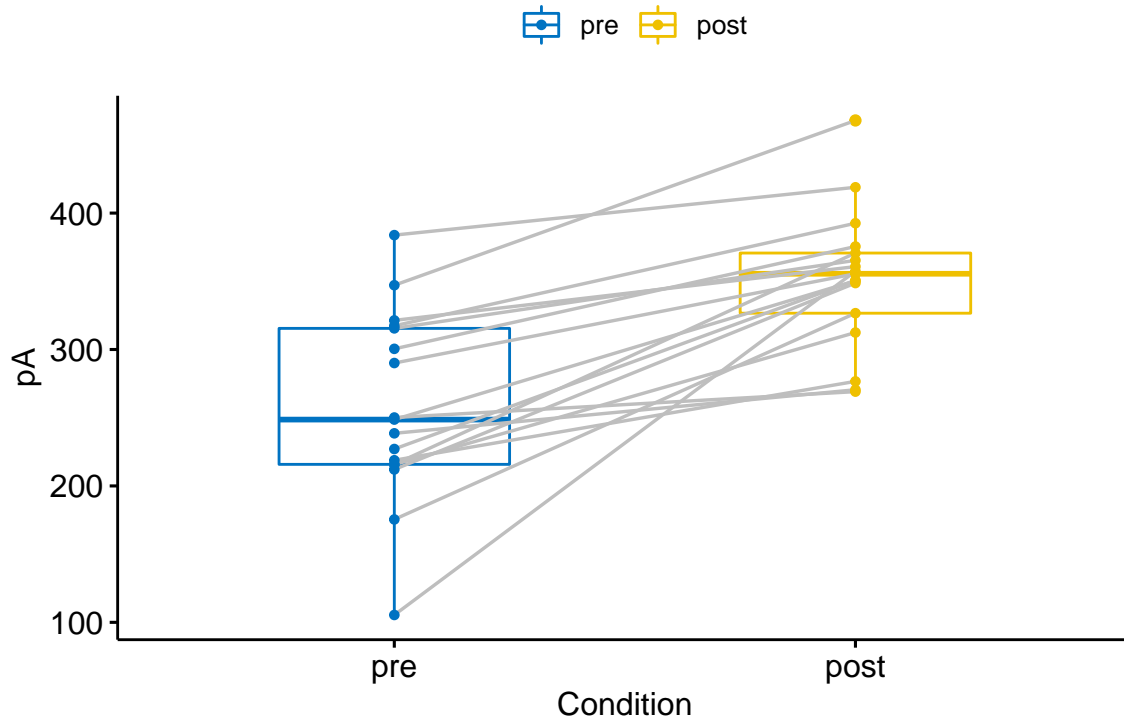

Easystat function for paired\_data developed by S. Park & B. Hong  
(available at <https://rpubs.com/koho0127>)

## Statistical Result

```
paired_easystat(d1)
```

```
## 1. Normality assumption test by Shapiro_Wilk test is  
## p = 0.928  
## Normality assumption was not rejected  
## 2. The result of paired t-test is  
## p = 0.000  
## A statistically significant difference exist between groups
```

# Suppl\_Fig1B.CPP score\_Male Data analysis using R

Boohwi Hong

## Package install

## Data import

## Data structure

```
str(d1)
```

```
## 'data.frame': 34 obs. of 3 variables:  
## $ subject : int 1 2 3 4 5 6 7 8 9 10 ...  
## $ group : chr "Cont" "Cont" "Cont" "Cont" ...  
## $ CPP.score: num 50.9 39 -20.1 108.7 119.5 ...
```

## Explorative data analysis with graphics

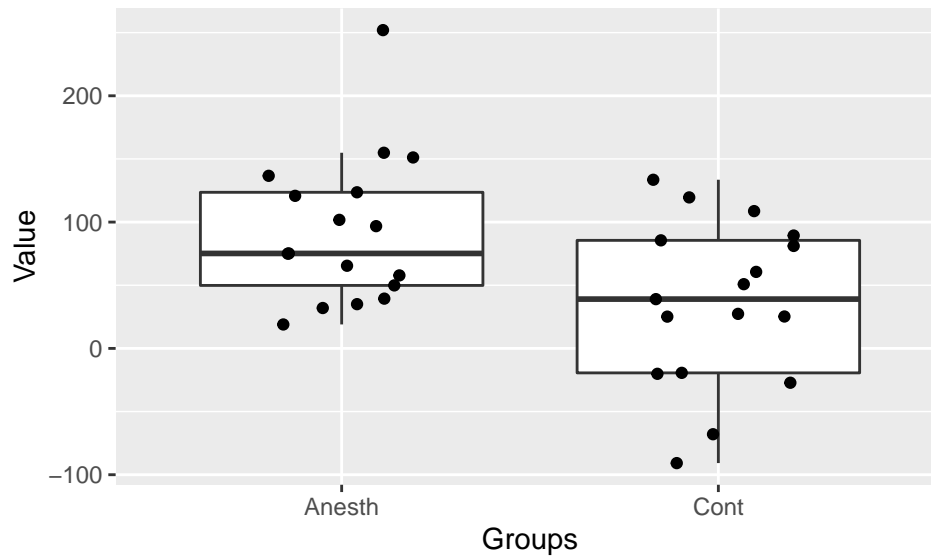

Easystat function developed by S. Park (available at <https://rpubs.com/goodlebang>)

## Statistical Result

```
easystat(d1)
```

```
## 1. Normality assumption test by Shapiro_Wilk test is
## p = 0.96
## Normality assumption was not rejected
## 2. Equal variance test by Bartlett test is
## p = 0.720
## Equal variance assumption was not rejected
## 3. The result of anova is
## p = 0.012
## A statistically significant difference exist between groups

## Tukey multiple comparisons of means
## 95% family-wise confidence level
##
## Fit: aov(formula = d1[, 3] ~ d1[, 2], data = d1)
##
## $'d1[, 2]'
```

|                | diff      | lwr       | upr       | p adj     |
|----------------|-----------|-----------|-----------|-----------|
| ## Cont-Anesth | -56.80029 | -100.1968 | -13.40377 | 0.0119312 |

# Supplementary Note 7

The results of statistical analysis  
for Supplementary Figure 2



# Suppl\_Fig2\_B.keta-CPP\_anesth\_male(Adult)Data analysis using R

Boohwi Hong

## Statistical Result

```
## Present data is ** Suppl_Fig2_B.keta-CPP_anesth_male(Adult).csv ** ##  
## ** Data structure **  
## 'data.frame': 64 obs. of 3 variables:  
## $ subjectint 1 2 3 4 5 6 7 8 9 10 ...  
## $ group : chr "pre" "pre" "pre" "pre" ...  
## $ duration : num 312 322 274 375 274 ...  
##  
## ** Explorative data analysis with graphics**
```

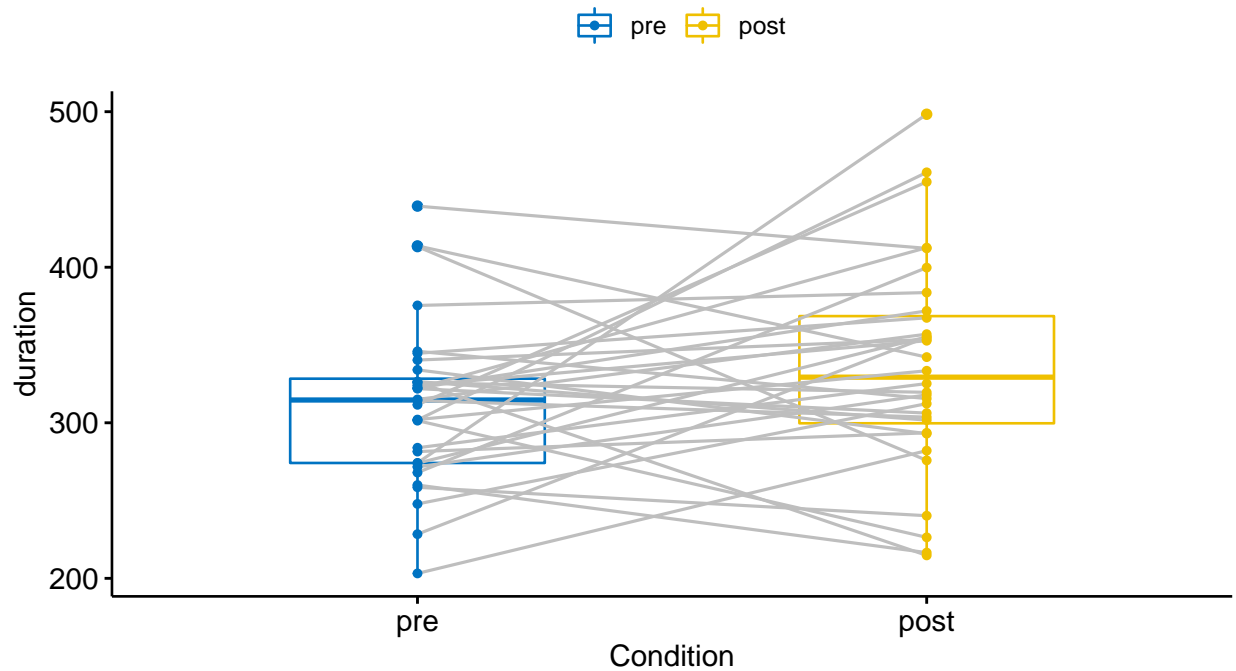

```
## 1. Normality assumption test by Shapiro_Wilk test is  
## p = 0.153  
## Normality assumption was not rejected  
## 2. The result of paired t-test is  
## p = 0.091  
## A statistically significant difference do not exist between groups
```

# Suppl\_Fig2\_B.keta-CPP\_control\_male(Adult)Data analysis using R

Boohwi Hong

## Statistical Result

```
## Present data is ** Suppl_Fig2_B.keta-CPP_control_male(Adult).csv ** ##  
## ** Data structure **  
## 'data.frame': 64 obs. of 3 variables:  
## $ subjectint 1 2 3 4 5 6 7 8 9 10 ...  
## $ group : chr "pre" "pre" "pre" "pre" ...  
## $ duration : num 270 256 236 352 372 ...  
##  
## ** Explorative data analysis with graphics**
```

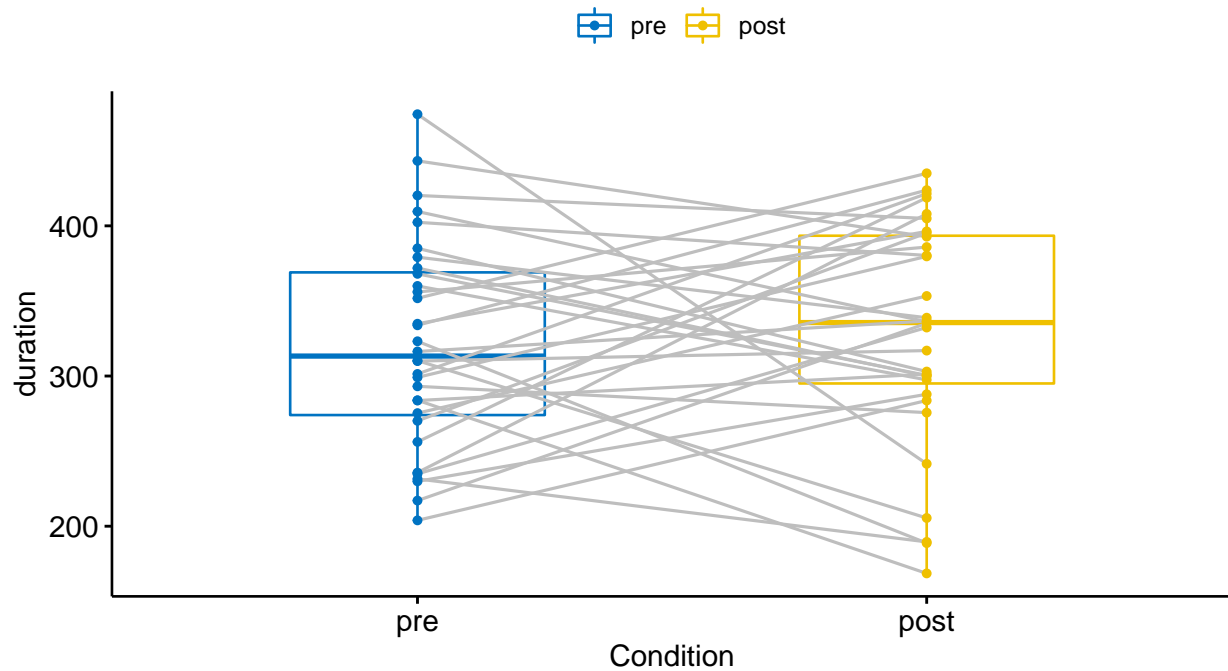

```
## 1. Normality assumption test by Shapiro_Wilk test is  
## p = 0.593  
## Normality assumption was not rejected  
## 2. The result of paired t-test is  
## p = 0.620  
## A statistically significant difference do not exist between groups
```

# Suppl\_Fig2\_C.keta-CPP\_CPPscore\_male(Adult)Data analysis using R

Boohwi Hong

```
## Present data is ** Suppl_Fig2_C.keta-CPP_CPPscore_male(Adult).csv ** ##  
## ** Data structure **  
## 'data.frame': 64 obs. of 3 variables:  
  
## $ subject: int 1 2 3 4 5 6 7 8 9 10 ...  
## $ group : chr "control" "control" "control" "control" ...  
## $ difference: num 125.1 162.6 172.2 83.2 -71.9 ...  
##  
## ** Explorative data analysis with graphics**
```

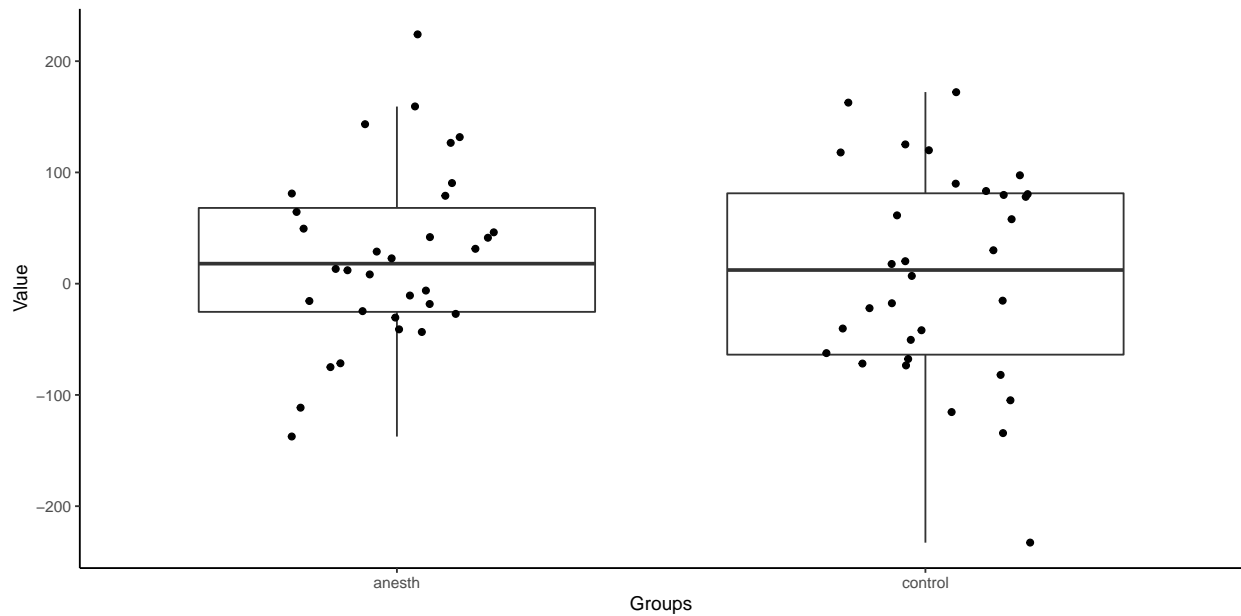

```
## 1. Normality assumption test by Shapiro_Wilk test is  
## p = 0.986  
## Normality assumption was not rejected  
## 2. Equal variance test by Bartlett test is  
## p = 0.321  
## Equal variance assumption was not rejected  
## 3. The result of anova is  
## p = 0.465  
## A statistically significant difference do not exist between groups  
##
```

# Supplementary Note 8

The results of statistical analysis  
for Supplementary Figure 3

# Suppl\_Fig3\_A.NAcc\_DA\_MaleData analysis using R

Boohwi Hong

```
## Present data is ** Suppl_Fig3_A.NAcc_DA_Male.csv ** ##  
## ** Data structure **
```

```
## 'data.frame': 18 obs. of 3 variables:  
## $ subject: int 1 2 3 4 5 6 7 8 9 10 ...  
## $ group : chr "control" "control" "control" "control" ...  
## $ value : num 21.8 26.9 13.4 13.9 21.7 ...  
##  
## ** Explorative data analysis with graphics**
```

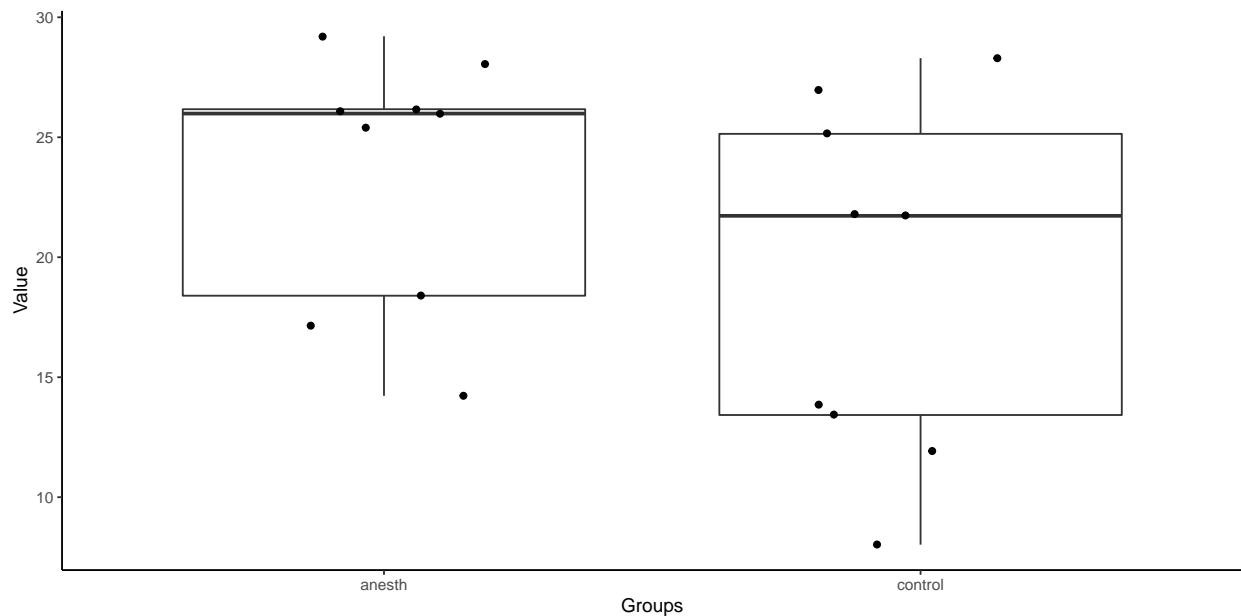

```
## 1. Normality assumption test by Shapiro_Wilk test is  
## p = 0.1  
## Normality assumption was not rejected  
## 2. Equal variance test by Bartlett test is  
## p = 0.391  
## Equal variance assumption was not rejected  
## 3. The result of anova is  
## p = 0.166  
## A statistically significant difference do not exist between groups  
##
```

# Suppl\_Fig3\_A.VTA\_DA\_MaleData analysis using R

Boohwi Hong

```
## Present data is ** Suppl_Fig3_A.VTA_DA_Male.csv **
##
## ** Data structure **
## 'data.frame': 16 obs. of 3 variables:
## $ subject: int 1 2 3 4 5 6 7 8 9 10 ...
## $ group : chr "control" "control" "control" "control" ...
## $ value : num 8.24 1.19 6.39 1.83 1.82 ...
##
## ** Explorative data analysis with graphics**
```

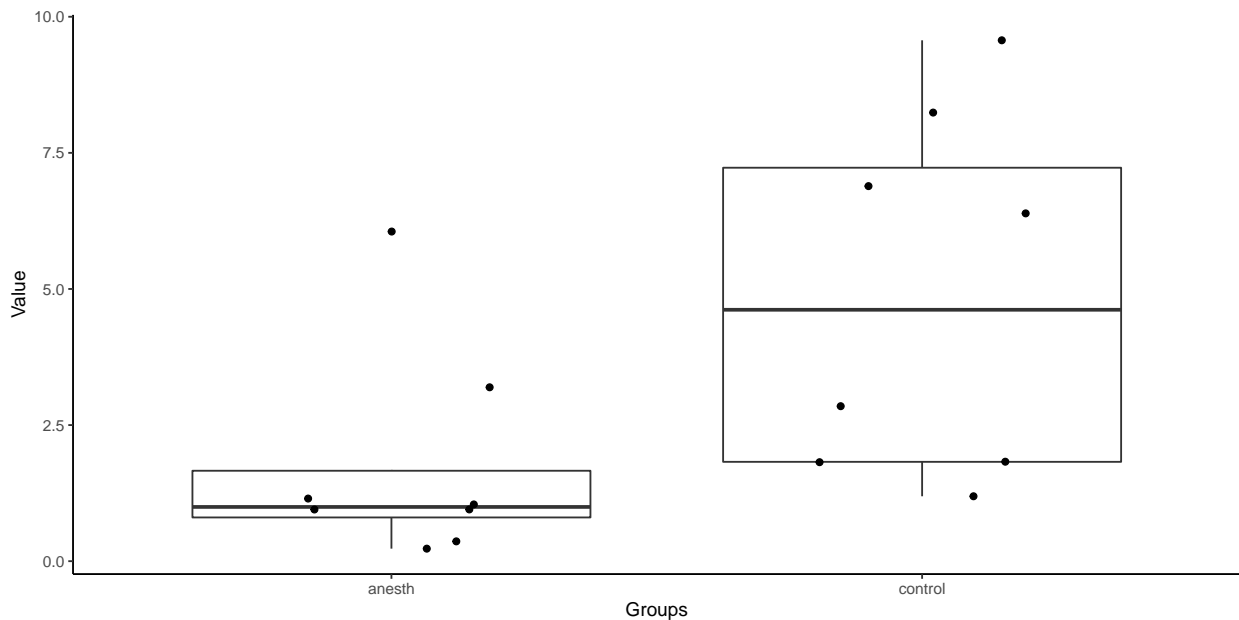

```
## 1. Normality assumption test by Shapiro_Wilk test is
## p = 0.25
## Normality assumption was not rejected
## 2. Equal variance test by Bartlett test is
## p = 0.195
## Equal variance assumption was not rejected
## 3. The result of anova is
## p = 0.038
## A statistically significant difference exist between groups
##
## Tukey multiple comparisons of means
## 95% family-wise confidence level
##
```

```
## Fit: aov(formula = d1[, 3] ~ d1[, 2], data = d1)
##
## $`d1[, 2]`
##           diff          lwr          upr          p adj
## control-anesth 3.104411 0.1958687 6.012953 0.038121
```

# Suppl\_Fig3\_A.Striatum\_DA\_MaleData analysis using R

Boohwi Hong

```
## Present data is ** Suppl_Fig3_A.Striatum_DA_Male.csv ** ##  
## ** Data structure **
```

```
## 'data.frame': 18 obs. of 3 variables:  
## $ subject: int 1 2 3 4 5 6 7 8 9 10 ...  
## $ group : chr "control" "control" "control" "control" ...  
## $ value : num 45 64.6 42 41.7 55.1 ...  
##  
## ** Explorative data analysis with graphics**
```

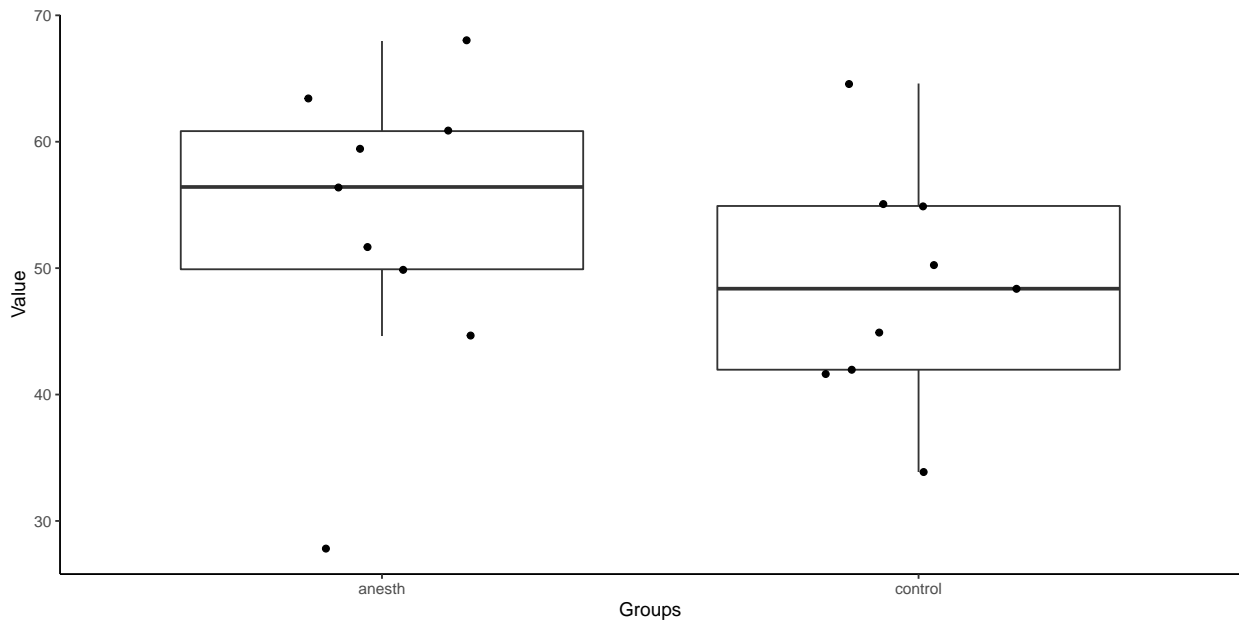

```
## 1. Normality assumption test by Shapiro_Wilk test is  
## p = 0.658  
## Normality assumption was not rejected  
## 2. Equal variance test by Bartlett test is  
## p = 0.445  
## Equal variance assumption was not rejected  
## 3. The result of anova is  
## p = 0.321  
## A statistically significant difference do not exist between groups  
##
```



# Suppl\_Fig3\_B.NAcc\_DOPAC\_MaleData analysis using R

Boohwi Hong

```
## Present data is ** Suppl_Fig3_B.NAcc_DOPAC_Male.csv ** ##  
## ** Data structure **  
## 'data.frame': 18 obs. of 3 variables:  
  
## $ subject: int 1 2 3 4 5 6 7 8 9 10 ...  
## $ group : chr "control" "control" "control" "control" ...  
## $ value : num 4.28 5.25 5.36 8.26 6.53 ...  
##  
## ** Explorative data analysis with graphics**
```

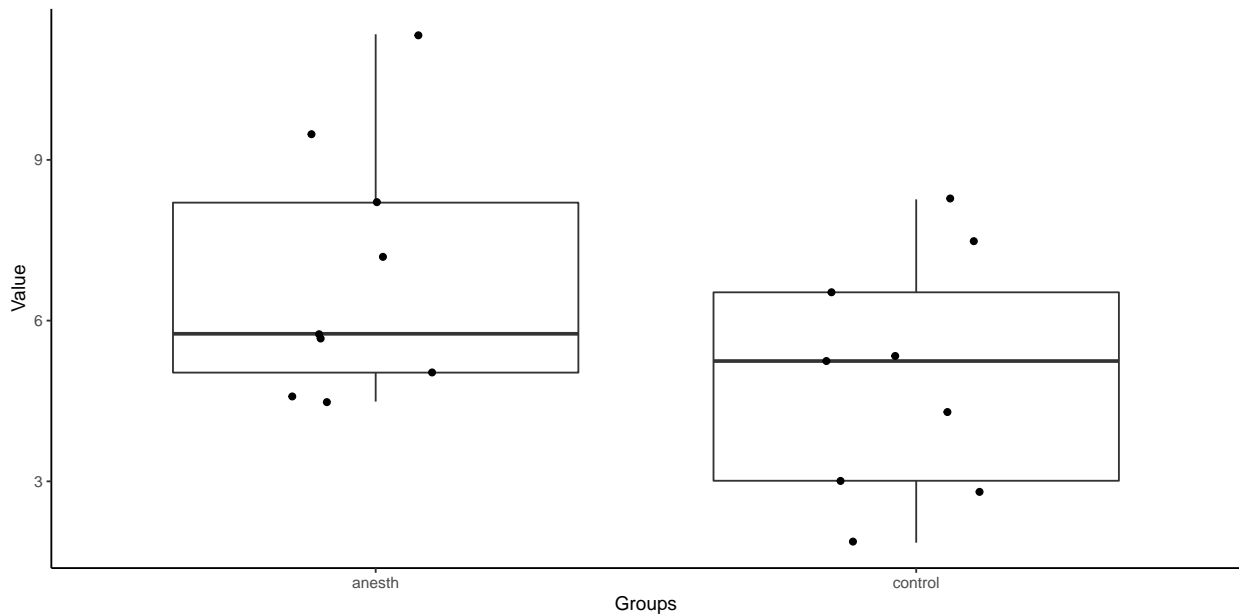

```
## 1. Normality assumption test by Shapiro_Wilk test is  
## p = 0.328  
## Normality assumption was not rejected  
## 2. Equal variance test by Bartlett test is  
## p = 0.814  
## Equal variance assumption was not rejected  
## 3. The result of anova is  
## p = 0.101  
## A statistically significant difference do not exist between groups  
##
```

# Suppl\_Fig3\_B.VTA\_DOPAC\_MaleData analysis using R

Boohwi Hong

```
## Present data is ** Suppl_Fig3_B.VTA_DOPAC_Male.csv ** ##
## ** Data structure **

## 'data.frame': 17 obs. of 3 variables:
## $ subject: int 1 2 3 4 5 6 7 8 9 10 ...
## $ group : chr "control" "control" "control" "control" ...
## $ value : num 1.875 0.155 1.255 0.62 0.524 ...
##
## ** Explorative data analysis with graphics**
```

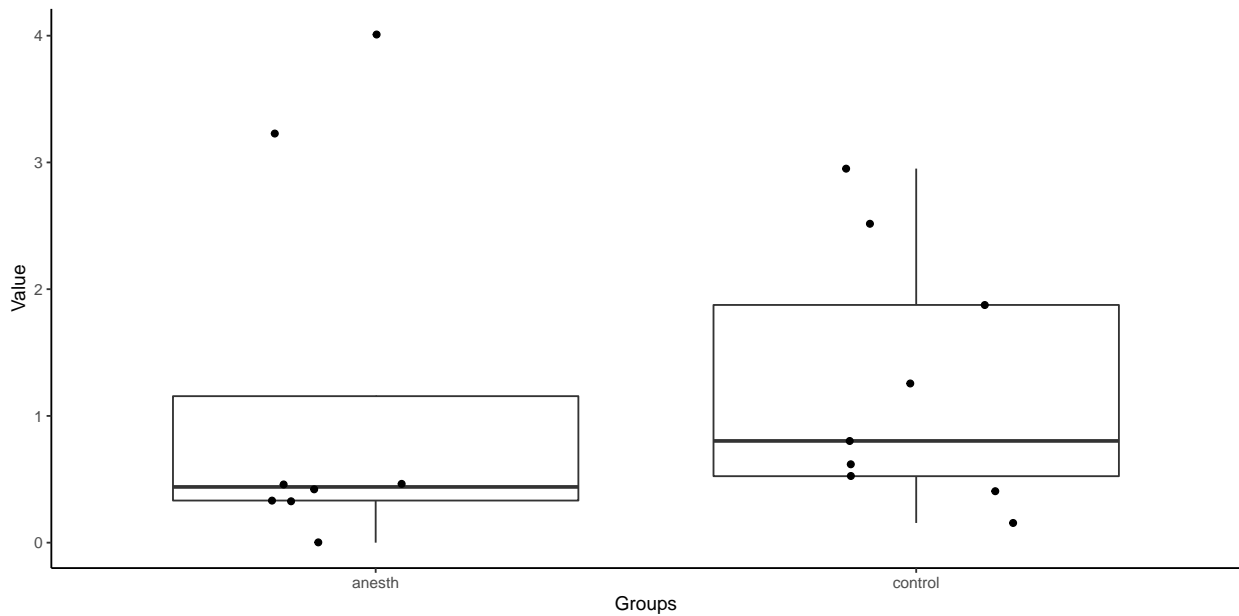

```
## 1. Normality assumption test by Shapiro_Wilk test is
## p = 0.002
## Normality assumption was rejected
## 2. The result of Kruskal_Wallis test:
## p = 0.336
## A statistically significant difference do not exist between groups
##
```

# Suppl\_Fig3\_B.striatum\_DOPAC\_MaleData analysis using R

Boohwi Hong

```
## Present data is ** Suppl_Fig3_B.striatum_DOPAC_Male.csv ** ##  
## ** Data structure **  
  
## 'data.frame': 18 obs. of 3 variables:  
## $ subject: int 1 2 3 4 5 6 7 8 9 10 ...  
## $ group : chr "control" "control" "control" "control" ...  
## $ value : num 10.54 11.2 11.05 8.99 10.36 ...  
##  
## ** Explorative data analysis with graphics**
```

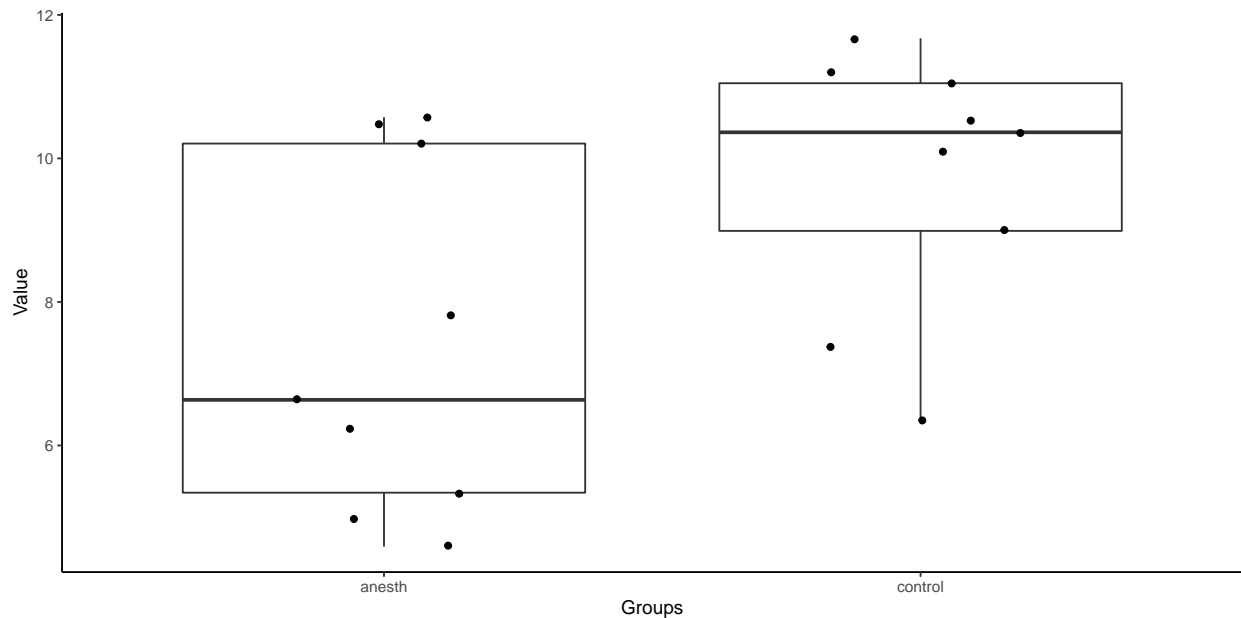

```
## 1. Normality assumption test by Shapiro_Wilk test is  
## p = 0.422  
## Normality assumption was not rejected  
## 2. Equal variance test by Bartlett test is  
## p = 0.418  
## Equal variance assumption was not rejected  
## 3. The result of anova is  
## p = 0.037  
## A statistically significant difference exist between groups  
##  
## Tukey multiple comparisons of means  
## 95% family-wise confidence level  
##
```

```
## Fit: aov(formula = d1[, 3] ~ d1[, 2], data = d1)
##
## $`d1[, 2]`
##           diff      lwr      upr      p adj
## control-anesth 2.311935 0.1618 4.46207 0.036698
```

# Supplementary Note 9

The results of statistical analysis  
for Supplementary Figure 4

# Data analysis using R

Boohwi Hong

```
## Present data is ** Suppl_Fig4.A_RMP_Male.csv **
##
## ** Data structure **
## 'data.frame':  13 obs. of  3 variables:
## $  subject: int  1 2 3 4 5 6 7 8 9 10 ...
## $  group   : chr  "control" "control" "control" "control" ...
## $  RMP     : num  -65 -65 -67 -69.5 -62.7 ...
##
## ** Explorative data analysis with graphics**
```

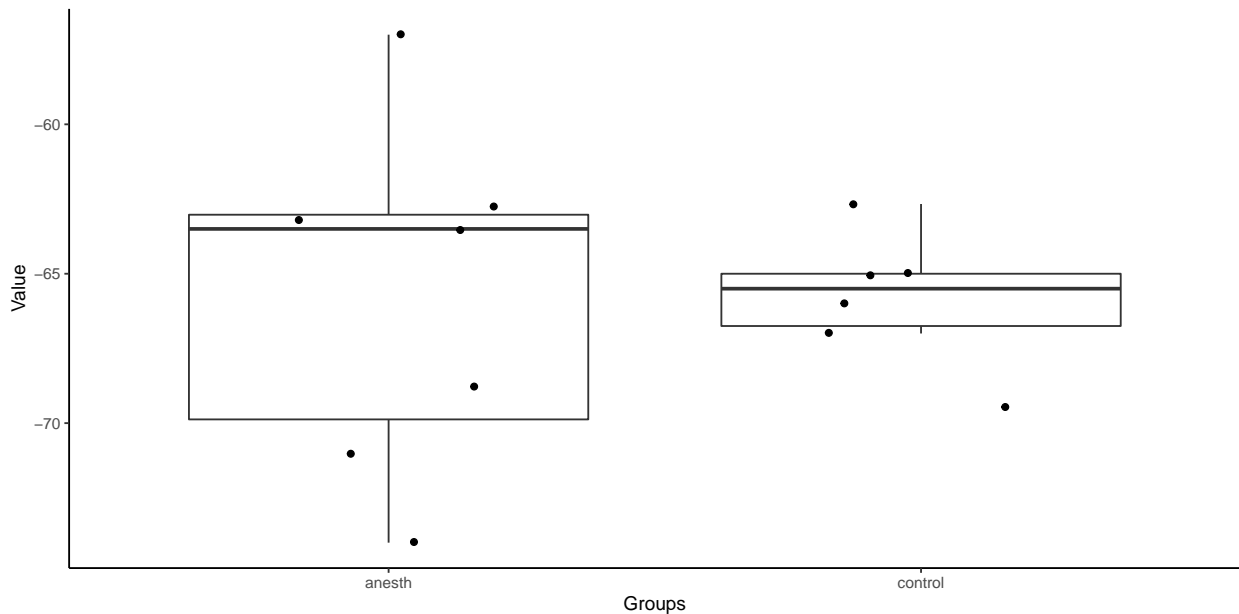

```
## 1. Normality assumption test by Shapiro_Wilk test is
## p = 0.921
## Normality assumption was not rejected
## 2. Equal variance test by Bartlett test is
## p = 0.057
## Equal variance assumption was not rejected
## 3. The result of anova is
## p = 0.968
## A statistically significant difference do not exist between groups
##
```



# Data analysis using R

Boohwi Hong

```
## Present data is ** Suppl_Fig4.C_Input Res_Male.csv **
##
## ** Data structure **
## 'data.frame': 13 obs. of 3 variables:
## $ subject : int 1 2 3 4 5 6 7 8 9 10 ...
## $ group : chr "control" "control" "control" "control" ...
## $ Input.Res: num 207 204 188 294 211 ...
##
## ** Explorative data analysis with graphics**
```

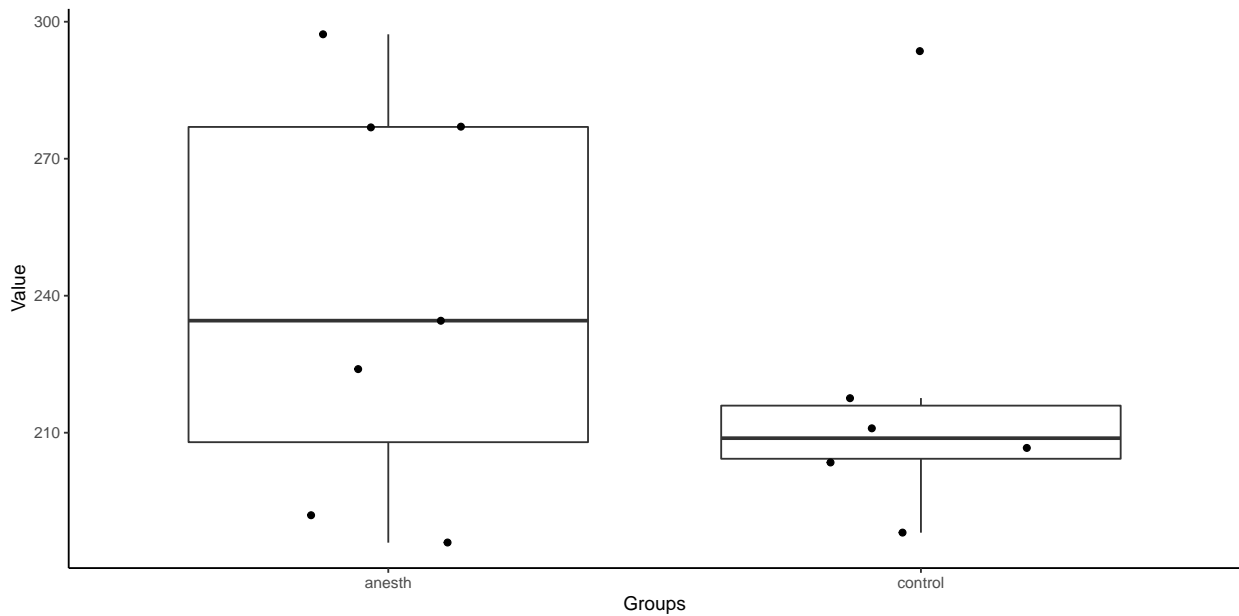

```
## 1. Normality assumption test by Shapiro_Wilk test is
## p = 0.365
## Normality assumption was not rejected
## 2. Equal variance test by Bartlett test is
## p = 0.721
## Equal variance assumption was not rejected
## 3. The result of anova is
## p = 0.377
## A statistically significant difference do not exist between groups
##
```



# Supplementary Note 10

The results of statistical analysis  
for Supplementary Figure 5

# Data analysis using R

Boohwi Hong

```
## Present data is ** Suppl_Fig5.B_mEPSC_amp_Male.csv **  
##  
## ** Data structure **  
## 'data.frame': 12 obs. of 3 variables:  
## $ subject: int 1 2 3 4 5 6 7 8 9 10 ...  
## $ group : chr "control" "control" "control" "control" ...  
## $ amp : num 46.1 36.8 28.8 20.5 19.5 ...  
##  
## ** Explorative data analysis with graphics**
```

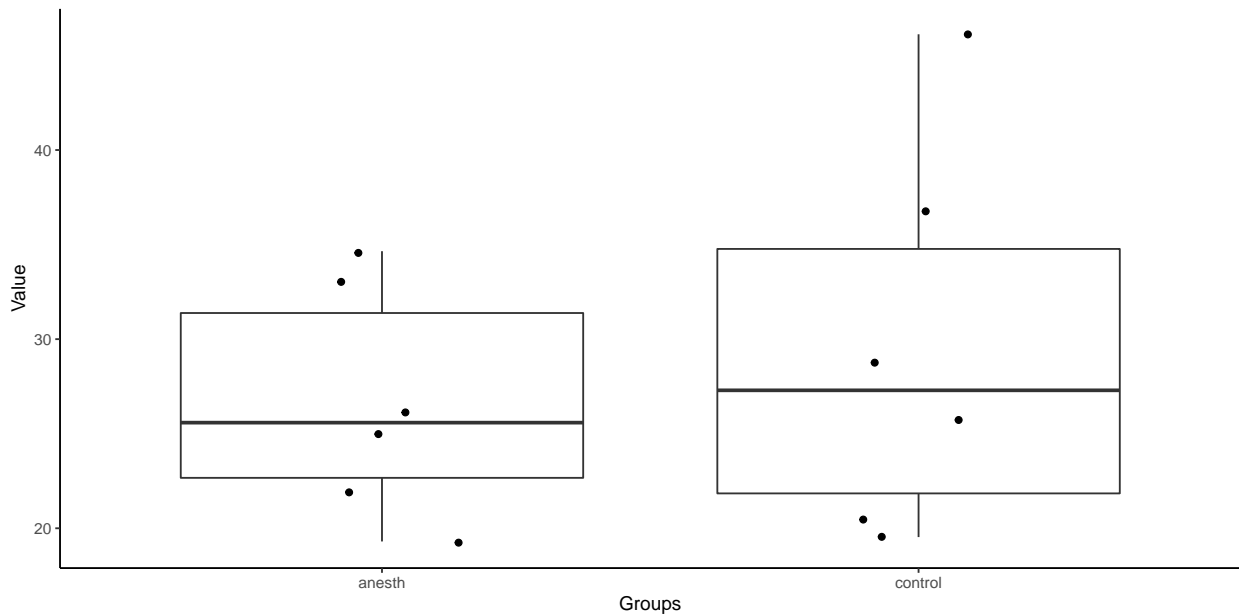

```
## 1. Normality assumption test by Shapiro_Wilk test is  
## p = 0.443  
## Normality assumption was not rejected  
## 2. Equal variance test by Bartlett test is  
## p = 0.279  
## Equal variance assumption was not rejected  
## 3. The result of anova is  
## p = 0.564  
## A statistically significant difference do not exist between groups  
##
```

# Data analysis using R

Boohwi Hong

```
## Present data is ** Suppl_Fig5.B_mEPSC_freq_Male.csv **
##
## ** Data structure **
## 'data.frame':  12 obs. of  3 variables:
## $ subject: int  1 2 3 4 5 6 7 8 9 10 ...
## $ group  : chr  "control" "control" "control" "control" ...
## $ freq   : num  0.01667 0.00417 0.00833 0.04792 0.01667 ...
##
## ** Explorative data analysis with graphics**
```

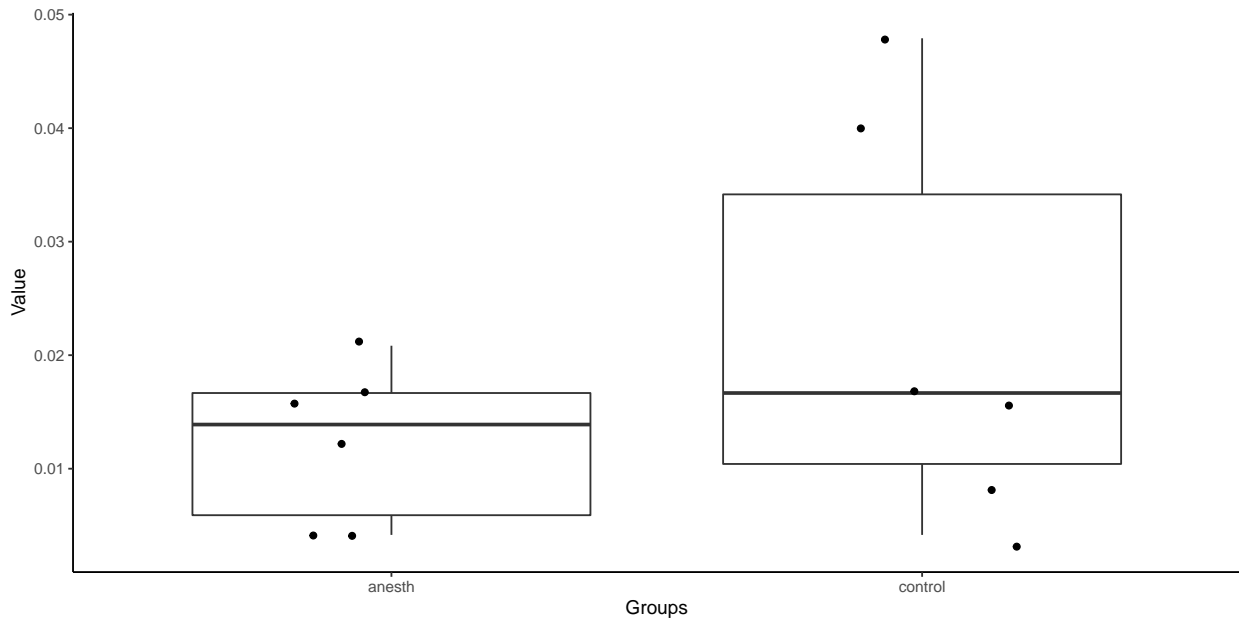

```
## 1. Normality assumption test by Shapiro_Wilk test is
## p = 0.684
## Normality assumption was not rejected
## 2. Equal variance test by Bartlett test is
## p = 0.064
## Equal variance assumption was not rejected
## 3. The result of anova is
## p = 0.225
## A statistically significant difference do not exist between groups
##
```

# Data analysis using R

Boohwi Hong

```
## Present data is ** Suppl_Fig5.D_mIPSC_amp_Male.csv **
##
## ** Data structure **
## 'data.frame':  13 obs. of  4 variables:
## $ subject: int  1 2 3 4 5 6 7 8 9 10 ...
## $ group  : chr  "control" "control" "control" "control" ...
## $ amp    : num  32.9 29.9 31.5 32.8 36.1 ...
## $ X      : logi  NA NA NA NA NA NA ...
##
## ** Explorative data analysis with graphics**
```

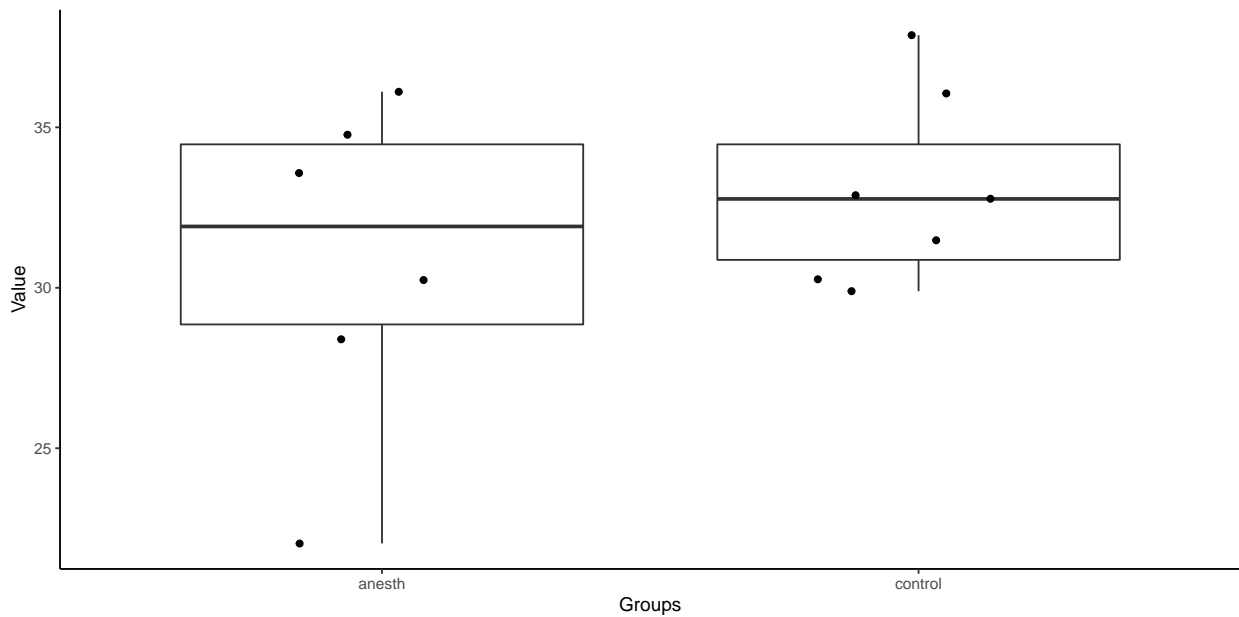

```
## 1. Normality assumption test by Shapiro_Wilk test is
## p = 0.411
## Normality assumption was not rejected
## 2. Equal variance test by Bartlett test is
## p = 0.214
## Equal variance assumption was not rejected
## 3. The result of anova is
## p = 0.364
## A statistically significant difference do not exist between groups
##
```

# Data analysis using R

Boohwi Hong

```
## Present data is ** Suppl_Fig5.D_mIPSC_freq_Male.csv **
##
## ** Data structure **
## 'data.frame':  13 obs. of  4 variables:
## $ subject: int  1 2 3 4 5 6 7 8 9 10 ...
## $ group  : chr  "control" "control" "control" "control" ...
## $ freq   : num  16.45 9.7 9.81 9.55 10.47 ...
## $ X      : logi  NA NA NA NA NA NA ...
##
## ** Explorative data analysis with graphics**
```

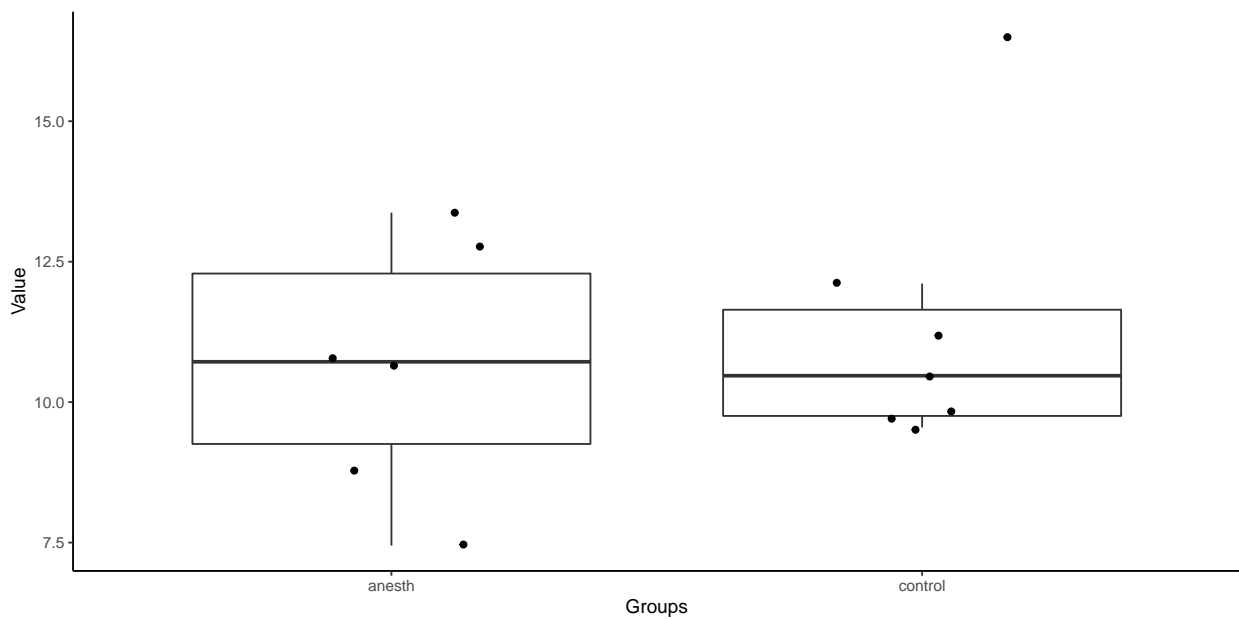

```
## 1. Normality assumption test by Shapiro_Wilk test is
## p = 0.363
## Normality assumption was not rejected
## 2. Equal variance test by Bartlett test is
## p = 0.868
## Equal variance assumption was not rejected
## 3. The result of anova is
## p = 0.613
## A statistically significant difference do not exist between groups
##
```

# Supplementary Note 11

The results of statistical analysis  
for Supplementary Figure 6

# Suppl\_Fig6\_A.LOR\_duration\_Female Data analysis using R

Boohwi Hong

## Package install

## Data import

## Data structure

```
str(d1)
```

```
## 'data.frame': 60 obs. of 3 variables:  
## $ subject : int 1 2 3 4 5 6 7 8 9 10 ...  
## $ inject : chr "1st_inject" "1st_inject" "1st_inject" "1st_inject" ...  
## $ duration: int 273 389 120 200 259 305 136 316 192 227 ...
```

## Explorative data analysis with graphics

```
## # A tibble: 5 x 11  
## inject variable n min max median iqr mean sd se ci  
## <chr> <chr> <dbl> <dbl> <dbl> <dbl> <dbl> <dbl> <dbl> <dbl> <dbl>  
## 1 1st_inject duration 12 0 613 243 130. 252. 153. 44.2 97.3  
## 2 2nd_inject duration 12 0 506 0 259 133. 178. 51.2 113.  
## 3 3rd_inject duration 12 0 330 0 316. 107. 158. 45.6 100.  
## 4 4th_inject duration 12 0 300 0 0 49.3 115. 33.3 73.2  
## 5 5th_inject duration 12 0 272 0 0 22.7 78.5 22.7 49.9
```

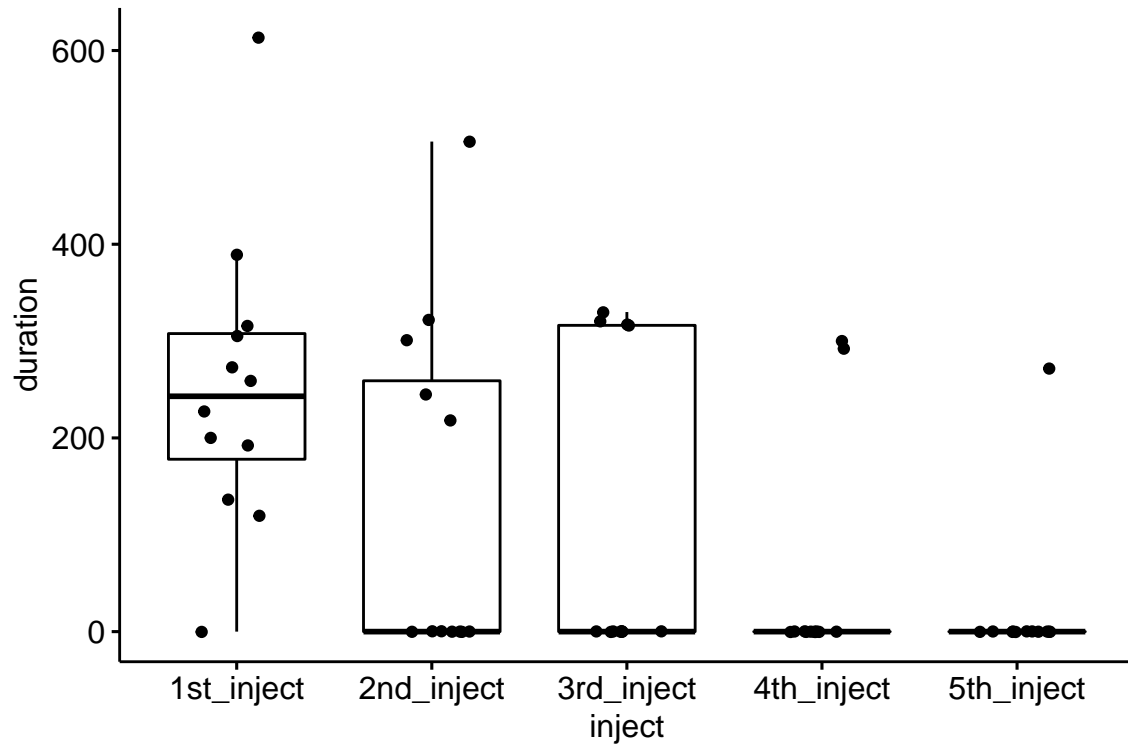

## Model fit

```
## # A tibble: 1 x 6
##   .y.      n statistic    df      p method
## * <chr>  <int>    <dbl> <dbl>  <dbl> <chr>
## 1 duration    12      14.6     4 0.00564 Friedman test
```

## Effect size

```
## # A tibble: 1 x 5
##   .y.      n effsize method  magnitude
## * <chr>  <int>    <dbl> <chr>    <ord>
## 1 duration    12    0.304 Kendall W moderate
```

## Multiple pairwise-comparisons

```
## # A tibble: 10 x 9
##   .y.    group1    group2     n1    n2 statistic    p p.adj p.adj.signif
## * <chr> <chr>    <chr>    <int> <int>    <dbl> <dbl> <dbl> <chr>
## 1 duration 1st_inject 2nd_inject    12    12      60 0.11  1    ns
## 2 duration 1st_inject 3rd_inject    12    12      58 0.029 0.294 ns
## 3 duration 1st_inject 4th_inject    12    12      62 0.011 0.113 ns
## 4 duration 1st_inject 5th_inject    12    12      65 0.005 0.051 ns
## 5 duration 2nd_inject 3rd_inject    12    12      6 0.787 1    ns
```



```
## 6 duration 2nd_inject 4th_inject 12 12 13 0.178 1 ns
## 7 duration 2nd_inject 5th_inject 12 12 18 0.142 1 ns
## 8 duration 3rd_inject 4th_inject 12 12 10 0.1 1 ns
## 9 duration 3rd_inject 5th_inject 12 12 14 0.106 1 ns
## 10 duration 4th_inject 5th_inject 12 12 5 0.423 1 ns
```

## Interpretation of result

```
## 1. The duration was statistically significantly different at the different time points
## p = 0.006
```

# Suppl\_Fig6\_B.OFT\_\_diatance\_\_Female Data analysis using R

Boohwi Hong

## Package install

## Data import

## Data structure

```
str(d1)
```

```
## 'data.frame': 120 obs. of 4 variables:  
## $ subject : int 13 14 15 16 17 18 19 20 21 22 ...  
## $ group : chr "cont_keta" "cont_keta" "cont_keta" "cont_keta" ...  
## $ trial : int 1 1 1 1 1 1 1 1 1 1 ...  
## $ distance: num 15.4 21.2 19.2 16.8 19.2 ...
```

## Explorative data analysis with graphics

```
##      group trial  n Mean Conf.level Percentile.lower Percentile.upper  
## 1 anesth_keta  1 12 16.4      0.95          14.8          17.9  
## 2 anesth_keta  2 12 19.3      0.95          16.8          21.7  
## 3 anesth_keta  3 12 22.5      0.95          20.3          24.8  
## 4 anesth_keta  4 12 21.1      0.95          18.5          23.5  
## 5 anesth_keta  5 12 30.0      0.95          27.6          32.5  
## 6  cont_keta   1 12 19.7      0.95          17.8          21.7  
## 7  cont_keta   2 12 22.2      0.95          20.2          24.3  
## 8  cont_keta   3 12 25.4      0.95          21.7          29.2  
## 9  cont_keta   4 12 26.7      0.95          23.9          29.6  
## 10 cont_keta   5 12 33.1      0.95          29.7          37.0
```

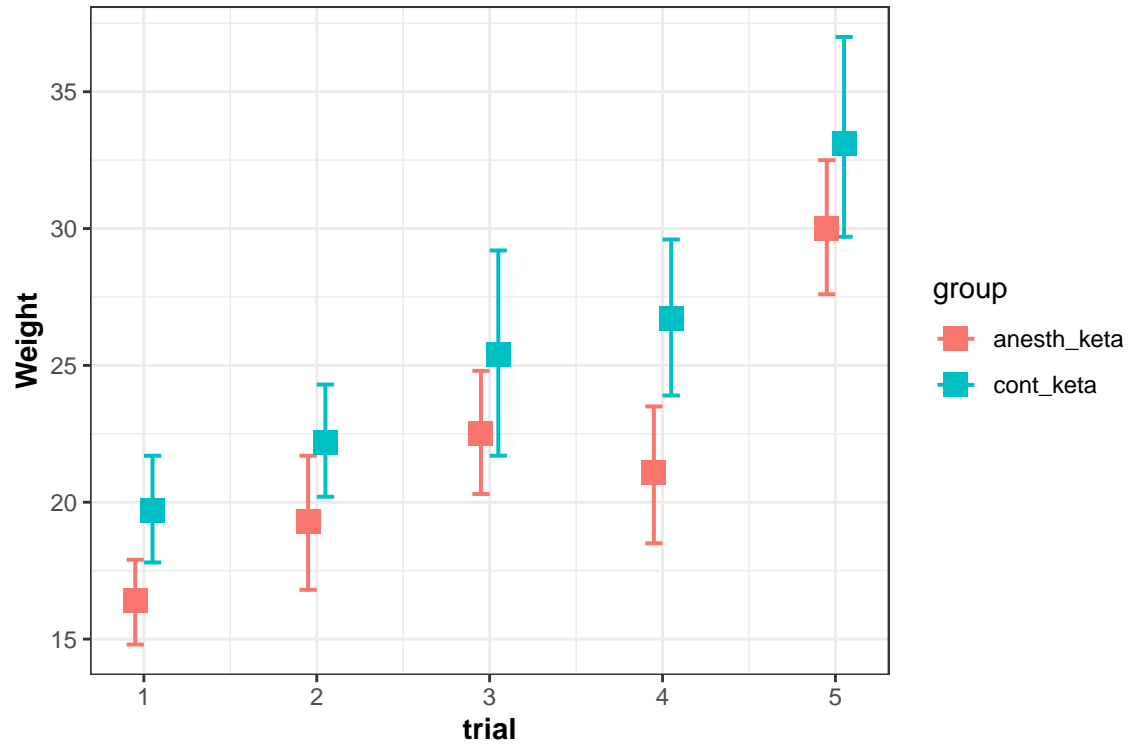

## Model fit

```
##
## Error: subject
##      Df Sum Sq Mean Sq
## group 1  306.7   306.7
##
## Error: subject:trial
##      Df Sum Sq Mean Sq
## trial 1  1826   1826
##
## Error: Within
##      Df Sum Sq Mean Sq F value Pr(>F)
## group  1  103.2   103.2  4.108 0.045017 *
## trial  1  357.3   357.3 14.225 0.000259 ***
## group:trial 1    3.7    3.7  0.149 0.700186
## Residuals 114 2863.3    25.1
## ---
## Signif. codes:  0 '***' 0.001 '**' 0.01 '*' 0.05 '.' 0.1 ' ' 1
```

## Interpretation of result

## 1. Difference exist between groups

## p = 0.045

## 2. Difference exist between measurement points

## p = 0.000

## 3. Significant interaction do not exist between groups and measurement points

## p = 0.700

# Supplementary Note 12

The results of statistical analysis  
for Supplementary Figure 7

# Data analysis using R

Boohwi Hong

## Statistical Result

```
## Present data is ** Suppl_Fig7_B.nico-CPP_Anesthesia_Female.csv ** ##  
## ** Data structure **  
## 'data.frame': 28 obs. of 3 variables:  
## $ subjectint 1 2 3 4 5 6 7 8 9 10 ...  
## $ group : chr "pre" "pre" "pre" "pre" ...  
## $ duration : num 299 339 226 360 336 ...  
##  
## ** Explorative data analysis with graphics**
```

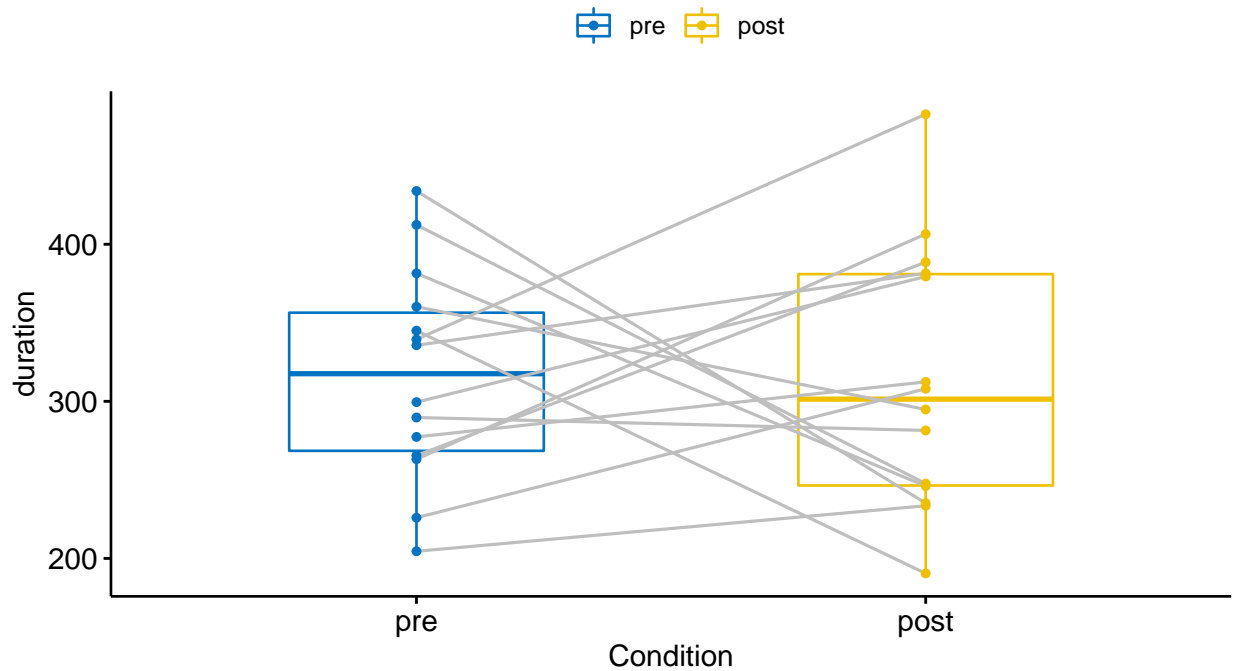

```
## 1. Normality assumption test by Shapiro_Wilk test is  
## p = 0.714  
## Normality assumption was not rejected  
## 2. The result of paired t-test is  
## p = 0.921  
## A statistically significant difference do not exist between groups
```

# Data analysis using R

Boohwi Hong

## Statistical Result

```
## Present data is ** Suppl_Fig7_B.nico-CPP_Control_Female.csv ** ##  
## ** Data structure **  
## 'data.frame': 34 obs. of 3 variables:  
## $ subjectint 1 2 3 4 5 6 7 8 9 10 ...  
## $ group : chr "pre" "pre" "pre" "pre" ...  
## $ duration : num 411 425 397 389 427 ...  
##  
## ** Explorative data analysis with graphics**
```

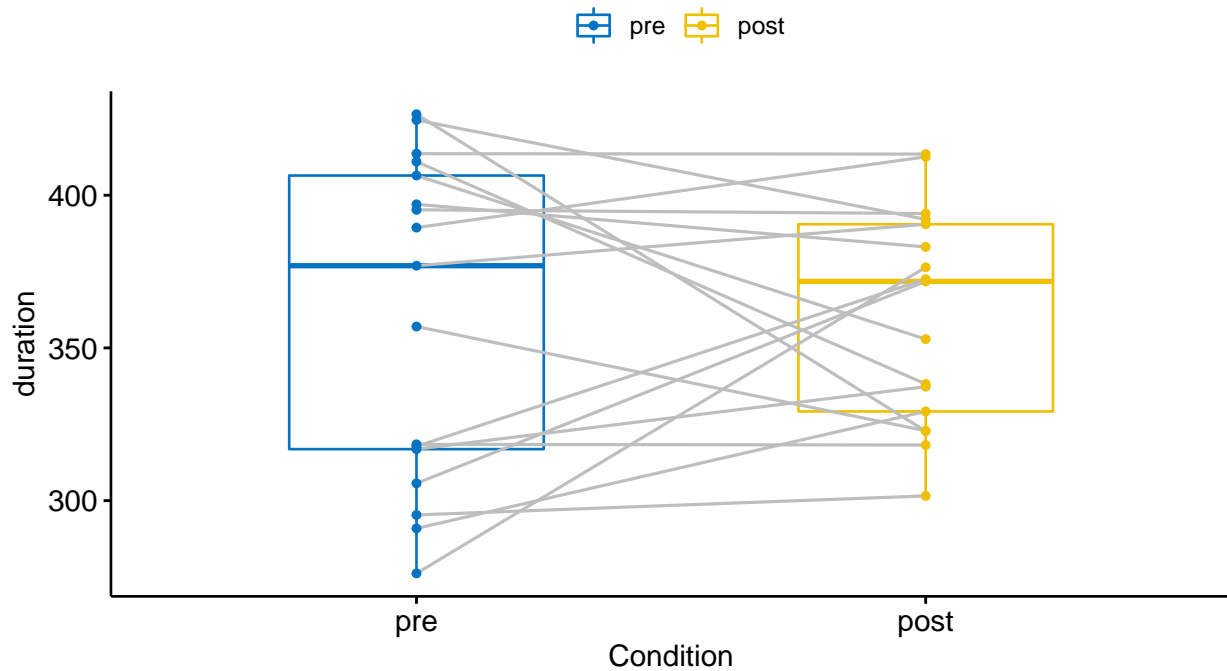

```
## 1. Normality assumption test by Shapiro_Wilk test is  
## p = 0.049  
## Normality assumption was rejected  
## 2. The result of Wilcoxon test is  
## p = 0.946  
## A statistically significant difference do not exist between groups
```

# Data analysis using R

Boohwi Hong

```
## Present data is ** Suppl_Fig7_C.nicotine-CPP_CPPscore_Female.csv **##  
## ** Data structure **  
  
## 'data.frame': 31 obs. of 3 variables:  
## $ subject: int 1 2 3 4 5 6 7 8 9 10 ...  
## $ group : chr "control" "control" "control" "control" ...  
## $ difference: num -72.8 -32.5 -13.9 23.2 -103.8 ...  
##  
## ** Explorative data analysis with graphics**
```

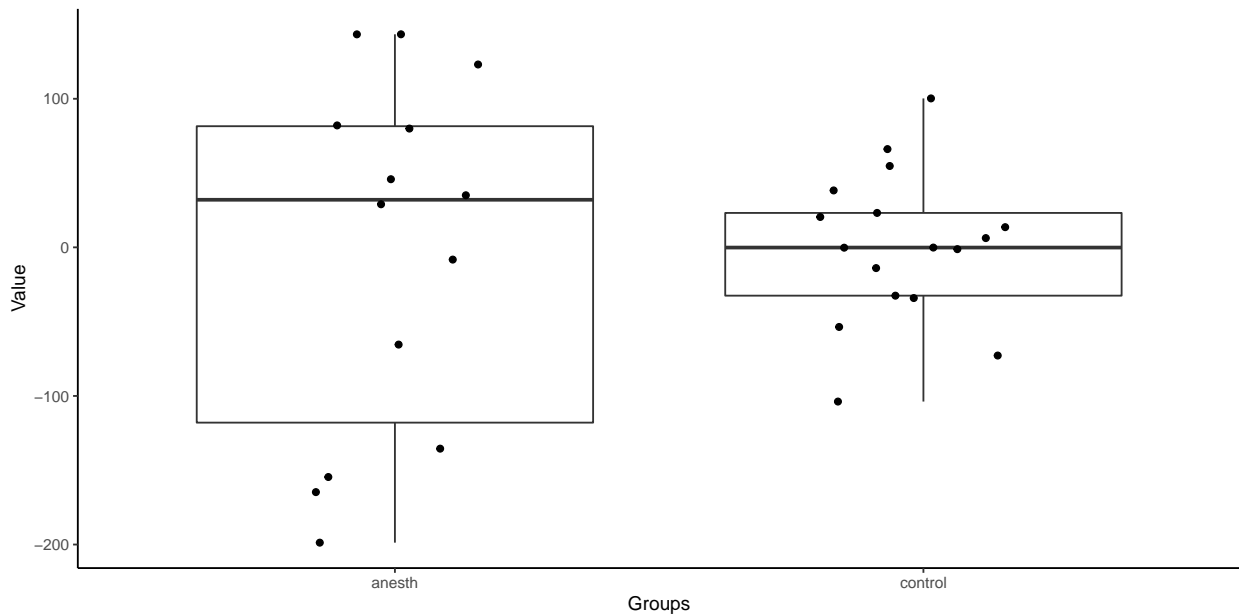

```
## 1. Normality assumption test by Shapiro_Wilk test is  
## p = 0.468  
## Normality assumption was not rejected  
## 2. Equal variance test by Bartlett test is  
## p = 0.002  
## Equal variance assumption was rejected  
## 3. The result of Welch ANOVA is  
## p = 0.912  
## A statistically significant difference do not exist between groups  
##
```



# Supplementary Note 13

The results of statistical analysis  
for Supplementary Figure 8

# Suppl\_Fig8A.Barnes maze\_Total latency Data analysis using R

Boohwi Hong

## Package install

## Data import

## Data structure

```
str(d1)
```

```
## 'data.frame': 92 obs. of 4 variables:  
## $ subject: int 1 2 3 4 5 6 7 8 9 10 ...  
## $ group : chr "Control" "Control" "Control" "Control" ...  
## $ trial : chr "day1" "day1" "day1" "day1" ...  
## $ value : num 149.3 83.3 161.3 162 37.7 ...
```

## Explorative data analysis with graphics

```
##      group trial  n Mean Conf.level Percentile.lower Percentile.upper  
## 1 Anesthesia day1 12 100.0      0.95          80.0          120.0  
## 2 Anesthesia day2 12  71.9      0.95          50.3          95.1  
## 3 Anesthesia day3 12  44.8      0.95          37.6          52.6  
## 4 Anesthesia day4 12  27.3      0.95          21.9          33.6  
## 5 Control    day1 11 108.0      0.95          81.5          134.0  
## 6 Control    day2 11  70.8      0.95          51.8          92.5  
## 7 Control    day3 11  39.9      0.95          34.9          45.3  
## 8 Control    day4 11  27.5      0.95          18.9          39.4
```

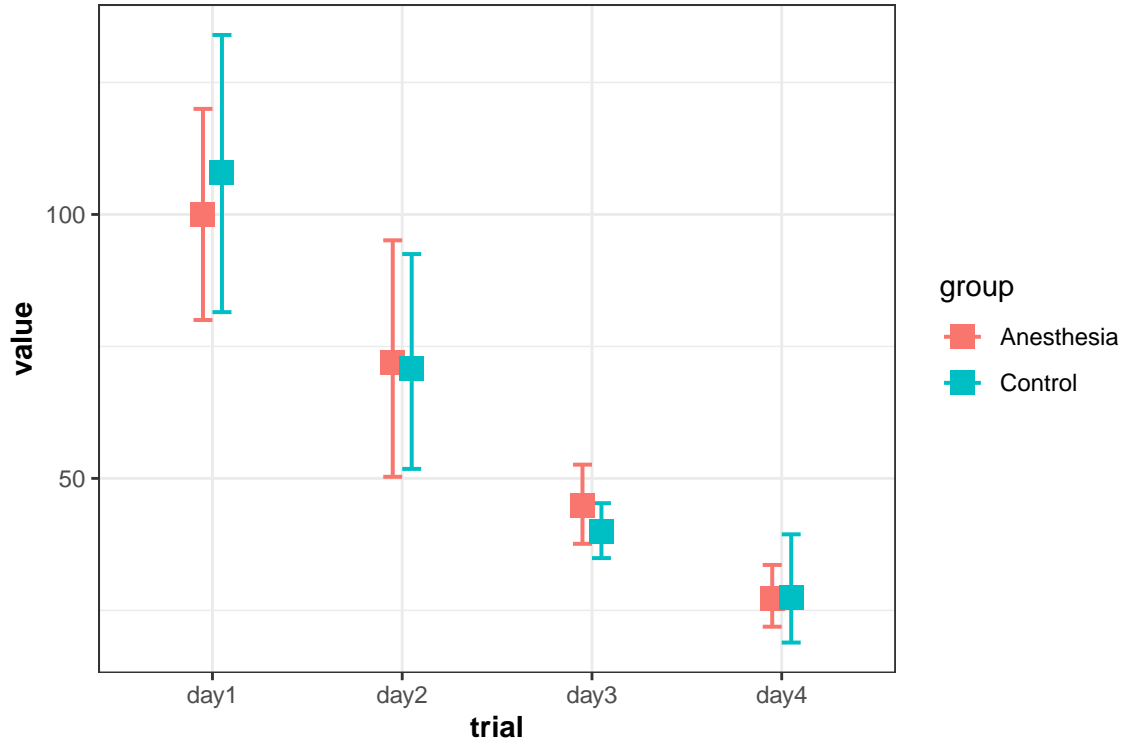

## Model fit

```
##
## Error: subject
##      Df Sum Sq Mean Sq
## group 1  5.558   5.558
##
## Error: subject:trial
##      Df Sum Sq Mean Sq
## trial 3 53089  17696
##
## Error: Within
##      Df Sum Sq Mean Sq F value Pr(>F)
## group  1    70     70   0.080  0.778
## trial  3 28431   9477  10.855 4.66e-06 ***
## group:trial 3   3714   1238   1.418  0.244
## Residuals 80 69843    873
## ---
## Signif. codes:  0 '***' 0.001 '**' 0.01 '*' 0.05 '.' 0.1 ' ' 1
```

## Interpretation of result

## 1. Difference do not exist between groups

## p = 0.778

## 2. Difference exist between measurement points

## p = 0.000

## 3. Significant interaction do not exist between groups and measurement points

## p = 0.244

# Suppl\_Fig8B.Barnes maze\_Total length Data analysis using R

Boohwi Hong

## Package install

## Data import

## Data structure

```
str(d1)
```

```
## 'data.frame':  92 obs. of  4 variables:
## $ subject: int  1 2 3 4 5 6 7 8 9 10 ...
## $ group  : chr  "Control" "Control" "Control" "Control" ...
## $ trial  : chr  "day1" "day1" "day1" "day1" ...
## $ value  : num  860 603 1190 958 1480 ...
```

## Explorative data analysis with graphics

```
##      group trial  n Mean Conf.level Percentile.lower Percentile.upper
## 1 Anesthesia day1 12 554      0.95           429           669
## 2 Anesthesia day2 12 471      0.95           354           600
## 3 Anesthesia day3 12 307      0.95           234           382
## 4 Anesthesia day4 12 221      0.95           179           270
## 5 Control    day1 11 806      0.95           612          1020
## 6 Control    day2 11 511      0.95           381           652
## 7 Control    day3 11 316      0.95           270           372
## 8 Control    day4 11 224      0.95           152           326
```

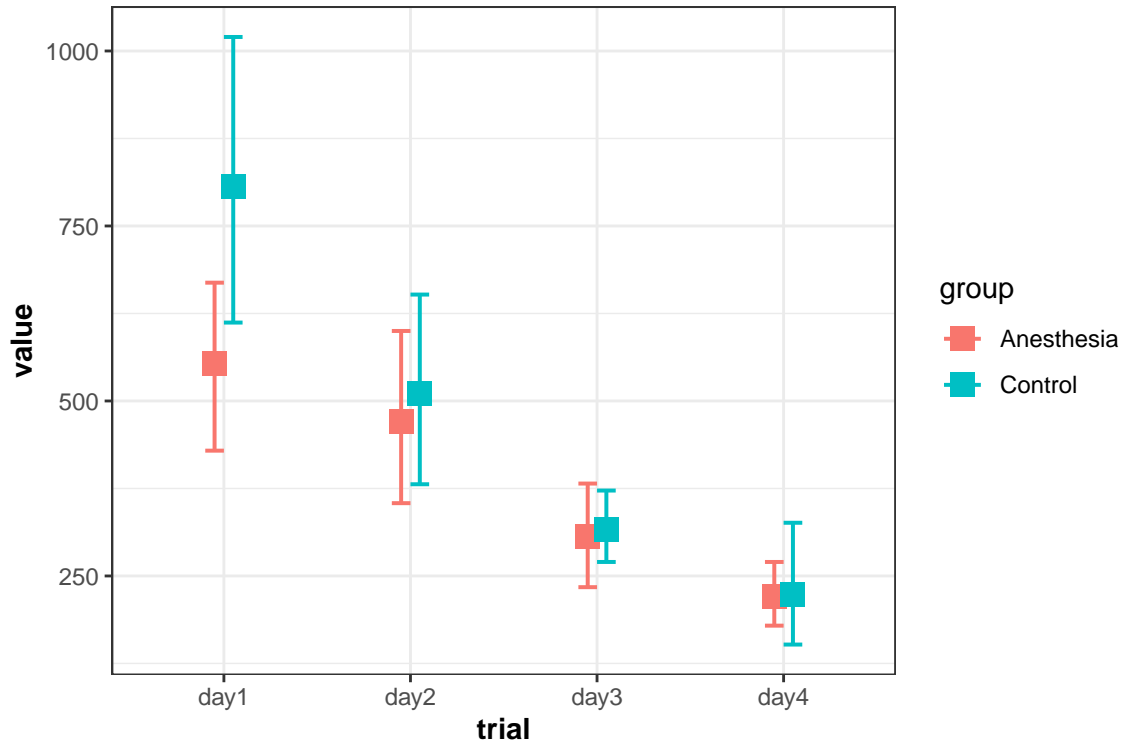

## Model fit

```
##
## Error: subject
##      Df Sum Sq Mean Sq
## group 1  64127   64127
##
## Error: subject:trial
##      Df Sum Sq Mean Sq
## trial 3 1525768 508589
##
## Error: Within
##      Df Sum Sq Mean Sq F value Pr(>F)
## group  1  83986   83986  1.964  0.165
## trial  3 1626452 542151 12.675 7.36e-07 ***
## group:trial 3  56882   18961  0.443  0.723
## Residuals 80 3421809  42773
## ---
## Signif. codes:  0 '***' 0.001 '**' 0.01 '*' 0.05 '.' 0.1 ' ' 1
```

## Interpretation of result

## 1. Difference do not exist between groups

## p = 0.165

## 2. Difference exist between measurement points

## p = 0.000

## 3. Significant interaction do not exist between groups and measurement points

## p = 0.723

# Suppl\_Fig8C.Barnes maze\_Total errors Data analysis using R

Boohwi Hong

## Package install

## Data import

## Data structure

```
str(d1)
```

```
## 'data.frame':  92 obs. of  4 variables:
## $ subject: int  1 2 3 4 5 6 7 8 9 10 ...
## $ group  : chr  "Control" "Control" "Control" "Control" ...
## $ trial  : chr  "day1" "day1" "day1" "day1" ...
## $ value  : num  9.67 10.33 10.67 20 17 ...
```

## Explorative data analysis with graphics

```
##      group trial  n Mean Conf.level Percentile.lower Percentile.upper
## 1 Anesthesia day1 12 11.10      0.95          8.78          13.10
## 2 Anesthesia day2 12 10.20      0.95          7.36          13.10
## 3 Anesthesia day3 12  9.44      0.95          7.58          11.40
## 4 Anesthesia day4 12  7.33      0.95          6.17           8.89
## 5   Control  day1 11 12.80      0.95         10.00          15.60
## 6   Control  day2 11 11.90      0.95          8.43          16.20
## 7   Control  day3 11  8.45      0.95          6.97           9.94
## 8   Control  day4 11  7.09      0.95          4.73           9.70
```



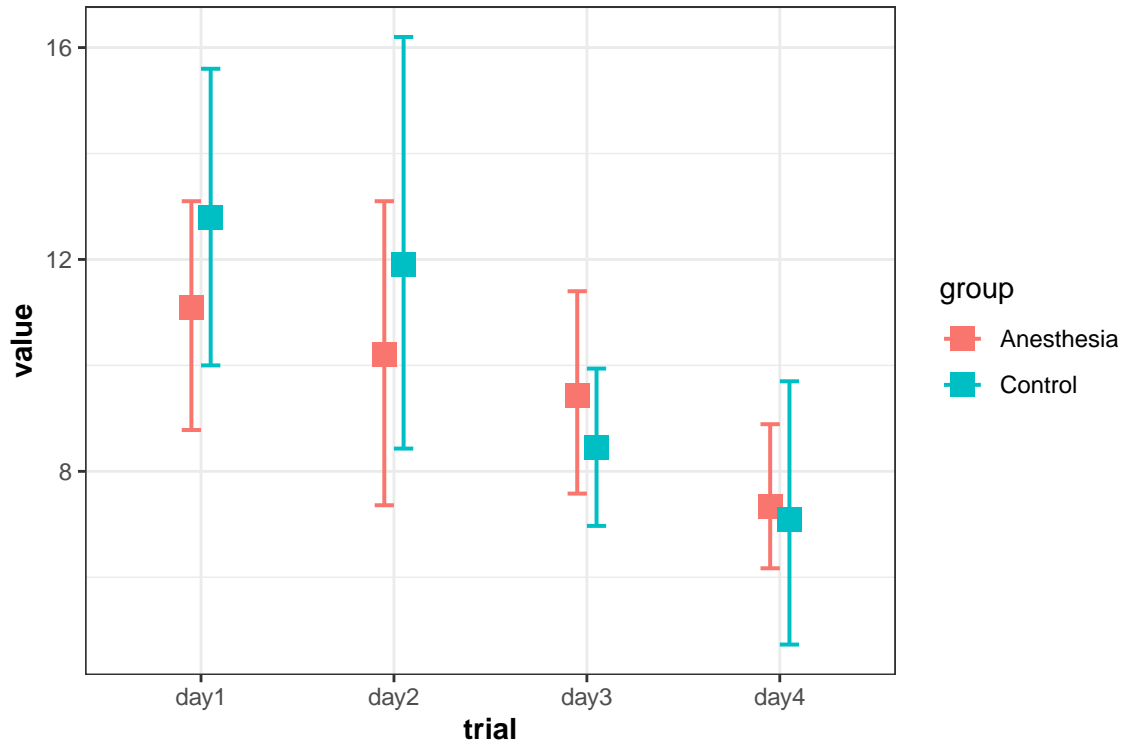

## Model fit

```
##
## Error: subject
##      Df Sum Sq Mean Sq
## group 1  3.758   3.758
##
## Error: subject:trial
##      Df Sum Sq Mean Sq
## trial 3 166.2   55.4
##
## Error: Within
##           Df Sum Sq Mean Sq F value Pr(>F)
## group      1   76.3   76.31   3.882 0.0523 .
## trial      3  178.5   59.48   3.026 0.0343 *
## group:trial 3   53.4   17.81   0.906 0.4422
## Residuals 80 1572.8   19.66
## ---
## Signif. codes:  0 '***' 0.001 '**' 0.01 '*' 0.05 '.' 0.1 ' ' 1
```

## Interpretation of result

## 1. Difference do not exist between groups

## p = 0.052

## 2. Difference exist between measurement points

## p = 0.034

## 3. Significant interaction do not exist between groups and measurement points

## p = 0.442

# Suppl\_Fig8D.Barnes maze\_Primary latency Data analysis using R

Boohwi Hong

## Package install

## Data import

## Data structure

```
str(d1)
```

```
## 'data.frame':  92 obs. of  4 variables:
## $ subject: int  1 2 3 4 5 6 7 8 9 10 ...
## $ group  : chr  "Control" "Control" "Control" "Control" ...
## $ trial  : chr  "day1" "day1" "day1" "day1" ...
## $ value  : num  45.3 22.1 135 126.5 27.1 ...
```

## Explorative data analysis with graphics

```
##      group trial  n Mean Conf.level Percentile.lower Percentile.upper
## 1 Anesthesia day1 12 74.8      0.95          53.0          97.2
## 2 Anesthesia day2 12 58.2      0.95          37.9          80.9
## 3 Anesthesia day3 12 31.2      0.95          23.7          39.7
## 4 Anesthesia day4 12 20.8      0.95          15.5          27.1
## 5 Control    day1 11 79.7      0.95          53.2         109.0
## 6 Control    day2 11 58.9      0.95          42.0          79.1
## 7 Control    day3 11 27.6      0.95          21.3          34.3
## 8 Control    day4 11 21.2      0.95          13.8          32.7
```

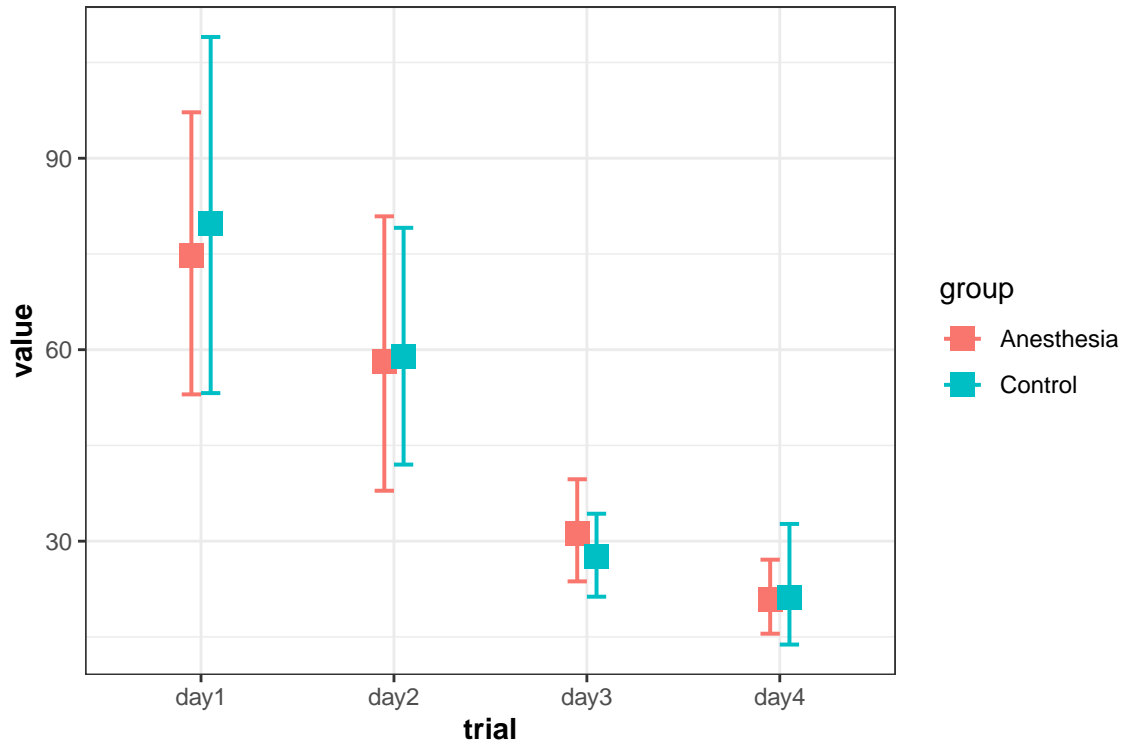

## Model fit

```
##
## Error: subject
##      Df Sum Sq Mean Sq
## group 1    285    285
##
## Error: subject:trial
##      Df Sum Sq Mean Sq
## trial 3 34977 11659
##
## Error: Within
##      Df Sum Sq Mean Sq F value Pr(>F)
## group  1  1227    1227   1.291 0.25926
## trial  3 11870    3957   4.164 0.00856 **
## group:trial 3    552    184   0.194 0.90049
## Residuals 80 76012    950
## ---
## Signif. codes:  0 '***' 0.001 '**' 0.01 '*' 0.05 '.' 0.1 ' ' 1
```

## Interpretation of result

## 1. Difference do not exist between groups

## p = 0.259

## 2. Difference exist between measurement points

## p = 0.009

## 3. Significant interaction do not exist between groups and measurement points

## p = 0.900

# Suppl\_Fig8E.Barnes maze\_Primary length Data analysis using R

Boohwi Hong

## Package install

## Data import

## Data structure

```
str(d1)
```

```
## 'data.frame': 92 obs. of 4 variables:
## $ subject: int 1 2 3 4 5 6 7 8 9 10 ...
## $ group : chr "Control" "Control" "Control" "Control" ...
## $ trial : chr "day1" "day1" "day1" "day1" ...
## $ value : num 172 230 691 780 169 ...
```

## Explorative data analysis with graphics

| ##   | group      | trial | n  | Mean | Conf.level | Percentile.lower | Percentile.upper |
|------|------------|-------|----|------|------------|------------------|------------------|
| ## 1 | Anesthesia | day1  | 12 | 435  | 0.95       | 299              | 583              |
| ## 2 | Anesthesia | day2  | 12 | 427  | 0.95       | 305              | 559              |
| ## 3 | Anesthesia | day3  | 12 | 252  | 0.95       | 182              | 333              |
| ## 4 | Anesthesia | day4  | 12 | 206  | 0.95       | 167              | 253              |
| ## 5 | Control    | day1  | 11 | 502  | 0.95       | 339              | 675              |
| ## 6 | Control    | day2  | 11 | 470  | 0.95       | 350              | 606              |
| ## 7 | Control    | day3  | 11 | 253  | 0.95       | 193              | 312              |
| ## 8 | Control    | day4  | 11 | 207  | 0.95       | 140              | 305              |

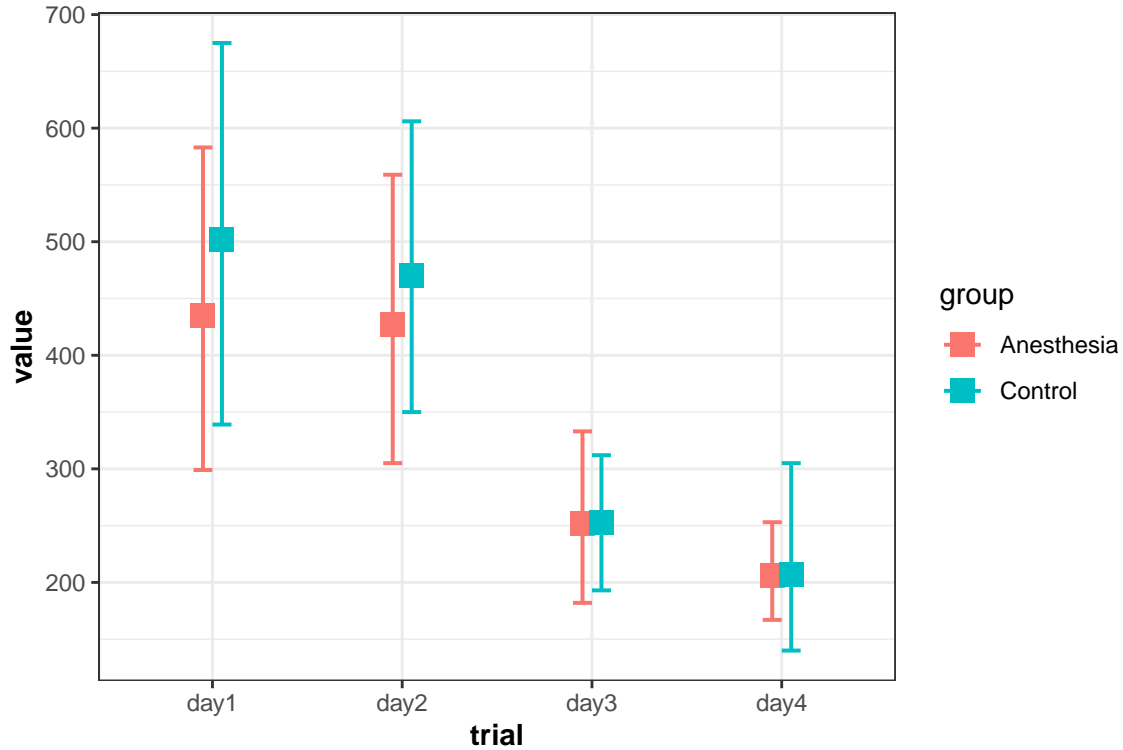

## Model fit

```
##
## Error: subject
##      Df Sum Sq Mean Sq
## group 1  4016    4016
##
## Error: subject:trial
##      Df Sum Sq Mean Sq
## trial 3 911233 303744
##
## Error: Within
##      Df Sum Sq Mean Sq F value Pr(>F)
## group  1 144686 144686  3.565 0.0626 .
## trial  3 309888 103296  2.545 0.0619 .
## group:trial 3  51635  17212  0.424 0.7363
## Residuals 80 3247144  40589
## ---
## Signif. codes:  0 '***' 0.001 '**' 0.01 '*' 0.05 '.' 0.1 ' ' 1
```

## Interpretation of result

## 1. Difference do not exist between groups

## p = 0.063

## 2. Difference do not exist between measurement points

## p = 0.062

## 3. Significant interaction do not exist between groups and measurement points

## p = 0.736



# Suppl\_Fig8F.Barnes maze\_Primary errors Data analysis using R

Boohwi Hong

## Package install

## Data import

## Data structure

```
str(d1)
```

```
## 'data.frame':  92 obs. of  4 variables:
## $ subject: int  1 2 3 4 5 6 7 8 9 10 ...
## $ group  : chr  "Control" "Control" "Control" "Control" ...
## $ trial  : chr  "day1" "day1" "day1" "day1" ...
## $ value  : num  3.33 3.67 7 15.33 4.67 ...
```

## Explorative data analysis with graphics

```
##      group trial  n Mean Conf.level Percentile.lower Percentile.upper
## 1 Anesthesia day1 12 8.89      0.95          6.36          11.50
## 2 Anesthesia day2 12 9.08      0.95          6.50          11.70
## 3 Anesthesia day3 12 7.94      0.95          6.19           9.89
## 4 Anesthesia day4 12 7.14      0.95          5.89           8.83
## 5 Control    day1 11 9.06      0.95          5.91          12.60
## 6 Control    day2 11 9.94      0.95          6.97          14.10
## 7 Control    day3 11 6.70      0.95          5.06           8.36
## 8 Control    day4 11 6.58      0.95          4.52           8.97
```

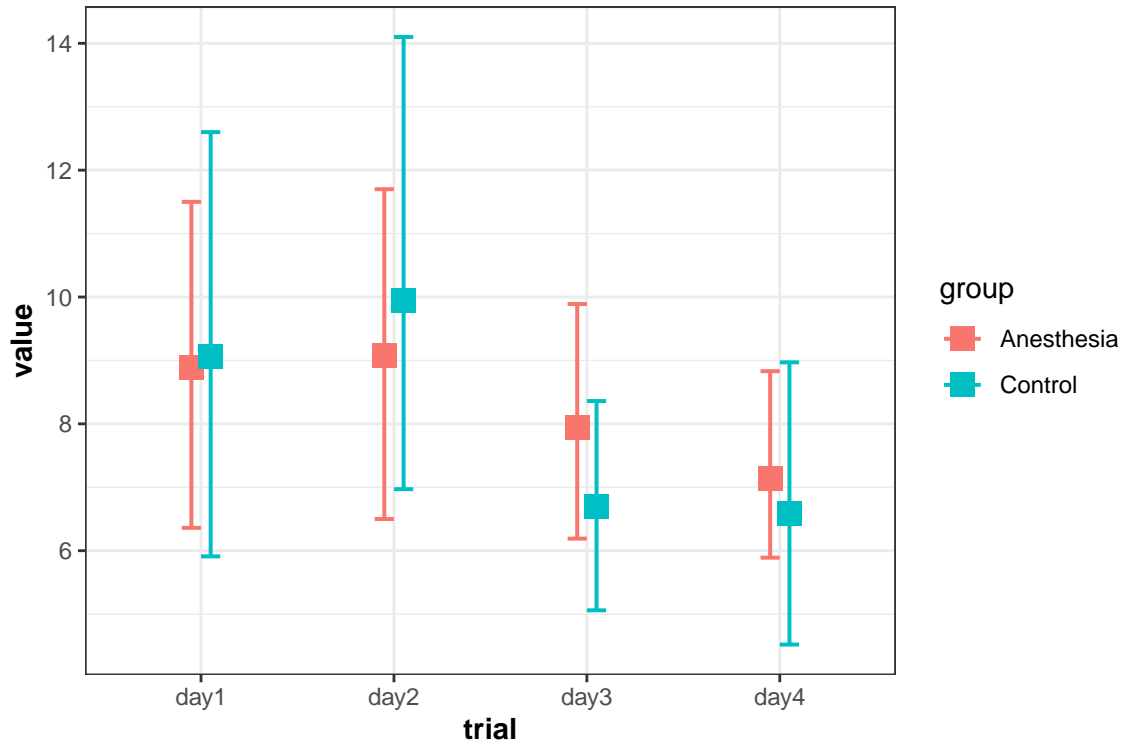

## Model fit

```
##
## Error: subject
##      Df Sum Sq Mean Sq
## group 1  33.21   33.21
##
## Error: subject:trial
##      Df Sum Sq Mean Sq
## trial 3  62.01   20.67
##
## Error: Within
##           Df Sum Sq Mean Sq F value Pr(>F)
## group      1   65.7   65.72   3.326 0.0719 .
## trial      3   60.8   20.27   1.026 0.3857
## group:trial 3   11.3    3.77   0.191 0.9022
## Residuals 80 1580.8   19.76
## ---
## Signif. codes:  0 '***' 0.001 '**' 0.01 '*' 0.05 '.' 0.1 ' ' 1
```

## Interpretation of result

## 1. Difference do not exist between groups

## p = 0.072

## 2. Difference do not exist between measurement points

## p = 0.386

## 3. Significant interaction do not exist between groups and measurement points

## p = 0.902

# Suppl\_Fig8G.Barnes maze\_distance Data analysis using R

Boohwi Hong

## Package install

## Data import

## Data structure

```
str(d1)
```

```
## 'data.frame': 23 obs. of 3 variables:  
## $ subject: int 1 2 3 4 5 6 7 8 9 10 ...  
## $ group : chr "Control" "Control" "Control" "Control" ...  
## $ value : num 663 792 470 554 543 ...
```

## Explorative data analysis with graphics

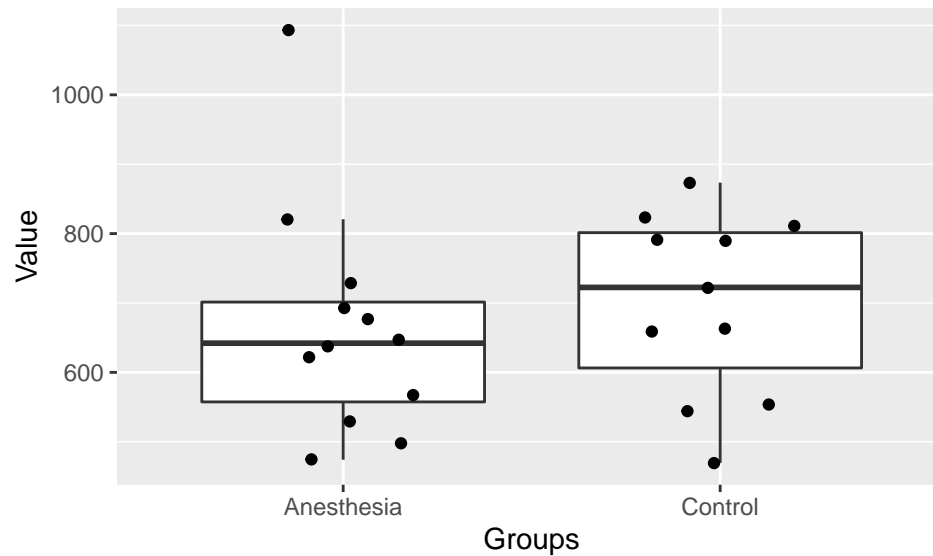

Easystat function developed by S. Park (available at <https://rpubs.com/goodlebang>)

## Statistical Result

```
easystat(d1)
```

```
## 1. Normality assumption test by Shapiro_Wilk test is  
## p = 0.213  
## Normality assumption was not rejected  
## 2. Equal variance test by Bartlett test is  
## p = 0.470  
## Equal variance assumption was not rejected  
## 3. The result of anova is  
## p = 0.5905  
## A statistically significant difference do not exist between groups
```

# Suppl\_Fig8G.Barnes maze\_latency Data analysis using R

Boohwi Hong

## Package install

## Data import

## Data structure

```
str(d1)
```

```
## 'data.frame':  23 obs. of  3 variables:  
## $ subject: int  1 2 3 4 5 6 7 8 9 10 ...  
## $ group  : chr  "Control" "Control" "Control" "Control" ...  
## $ value  : num  18.4 27.9 12.8 17.7 31.1 ...
```

## Explorative data analysis with graphics

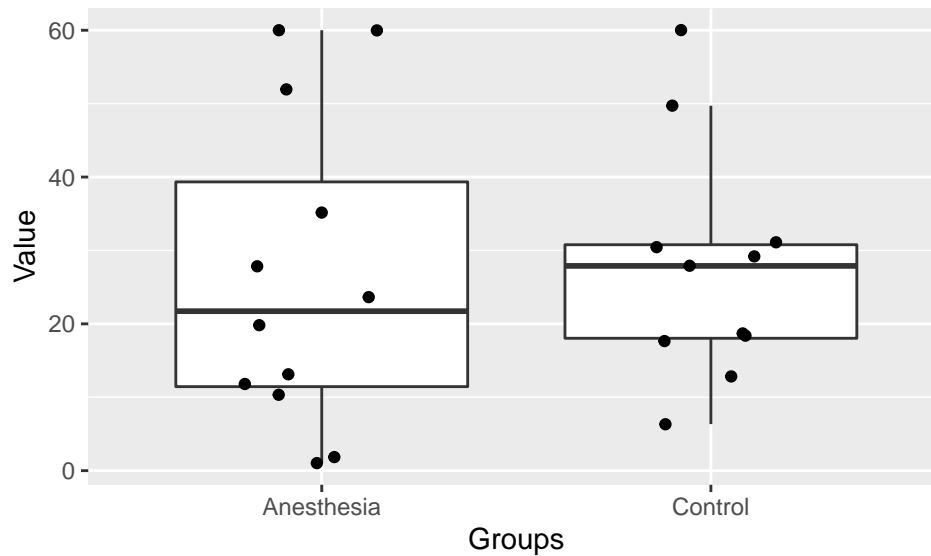

Easystat function developed by S. Park (available at <https://rpubs.com/goodlebang>)

## Statistical Result

```
easystat(d1)
```

```
## 1. Normality assumption test by Shapiro_Wilk test is  
## p = 0.043  
## Normality assumption was rejected  
## 2. The result of Kruskal-Wallis test:  
## p = 0.666  
## A statistically significant difference do not exist between groups
```

# Suppl\_Fig8G.Barnes maze\_time Data analysis using R

Boohwi Hong

## Package install

## Data import

## Data structure

```
str(d1)
```

```
## 'data.frame':  23 obs. of  3 variables:  
## $ subject: int  1 2 3 4 5 6 7 8 9 10 ...  
## $ group  : chr  "Control" "Control" "Control" "Control" ...  
## $ value  : num  39.1 35 44.8 24.1 44.4 ...
```

## Explorative data analysis with graphics

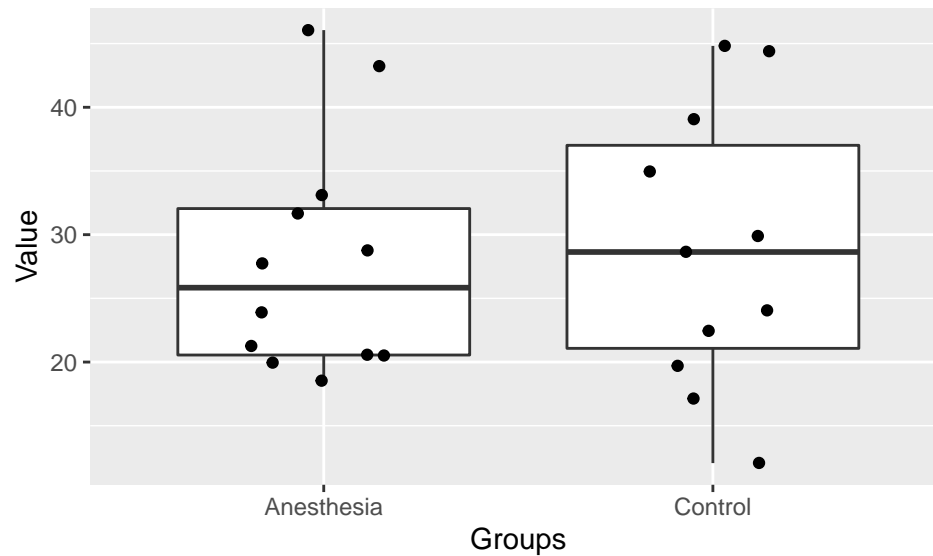



Easystat function developed by S. Park (available at <https://rpubs.com/goodlebang>)

## Statistical Result

```
easystat(d1)
```

```
## 1. Normality assumption test by Shapiro_Wilk test is
## p = 0.165
## Normality assumption was not rejected
## 2. Equal variance test by Bartlett test is
## p = 0.572
## Equal variance assumption was not rejected
## 3. The result of anova is
## p = 0.8344
## A statistically significant difference do not exist between groups
```

# Suppl\_Fig8H.Fear chamber test Data analysis using R

Boohwi Hong

## Package install

## Data import

## Data structure

```
str(d1)
```

```
## 'data.frame':  23 obs. of  3 variables:  
## $ subject: int  1 2 3 4 5 6 7 8 9 10 ...  
## $ group  : chr  "Control" "Control" "Control" "Control" ...  
## $ value  : num  43.11 72.44 4.09 51.29 40.98 ...
```

## Explorative data analysis with graphics

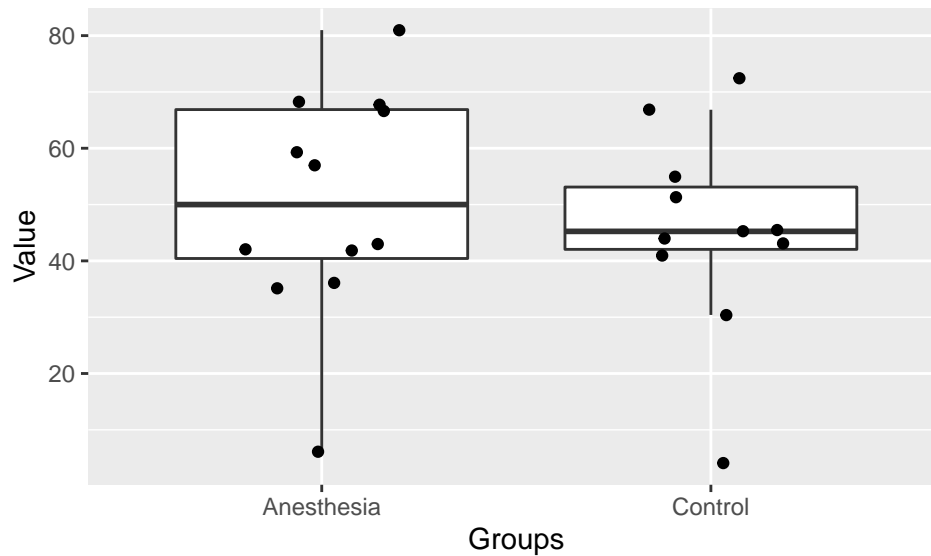

Easystat function developed by S. Park (available at <https://rpubs.com/goodlebang>)

## Statistical Result

```
easystat(d1)
```

```
## 1. Normality assumption test by Shapiro_Wilk test is  
## p = 0.26  
## Normality assumption was not rejected  
## 2. Equal variance test by Bartlett test is  
## p = 0.717  
## Equal variance assumption was not rejected  
## 3. The result of anova is  
## p = 0.5418  
## A statistically significant difference do not exist between groups
```

# Supplementary Note 14

The results of statistical analysis  
for Supplementary Figure 9

# Data analysis using R

Boohwi Hong

```
## Present data is ** Suppl_Fig9.A_RMP_Female.csv **
##
## ** Data structure **
## 'data.frame':  12 obs. of  3 variables:
## $  subject: int  1 2 3 4 5 6 7 8 9 10 ...
## $  group   : chr  "control" "control" "control" "control" ...
## $  RMP     : num  -60 -60.5 -58 -59.4 -58.8 ...
##
## ** Explorative data analysis with graphics**
```

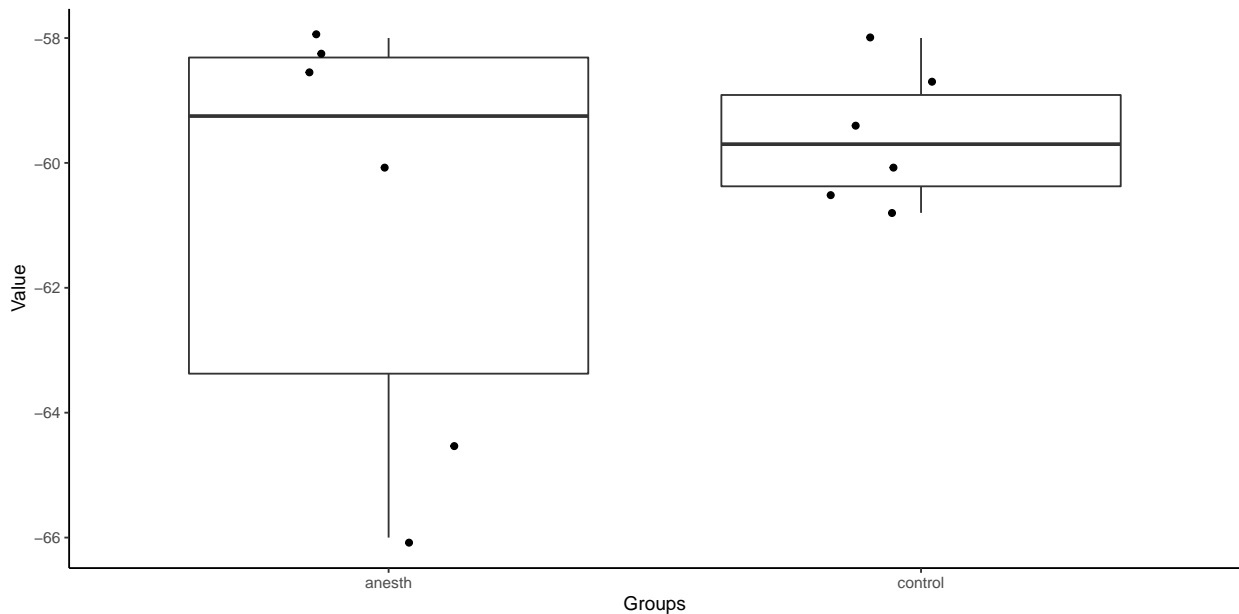

```
## 1. Normality assumption test by Shapiro_Wilk test is
## p = 0.298
## Normality assumption was not rejected
## 2. Equal variance test by Bartlett test is
## p = 0.022
## Equal variance assumption was rejected
## 3. The result of Welch ANOVA is
## p = 0.417
## A statistically significant difference do not exist between groups
##
```

# Data analysis using R

Boohwi Hong

```
## Present data is ** Suppl_Fig9.B_Threshold_Female.csv **  
##  
## ** Data structure **  
## 'data.frame': 12 obs. of 3 variables:  
## $ subject : int 1 2 3 4 5 6 7 8 9 10 ...  
## $ group : chr "control" "control" "control" "control" ...  
## $ Threshold: num -39.5 -40.1 -36 -45.3 -48.8 ...  
##  
## ** Explorative data analysis with graphics**
```

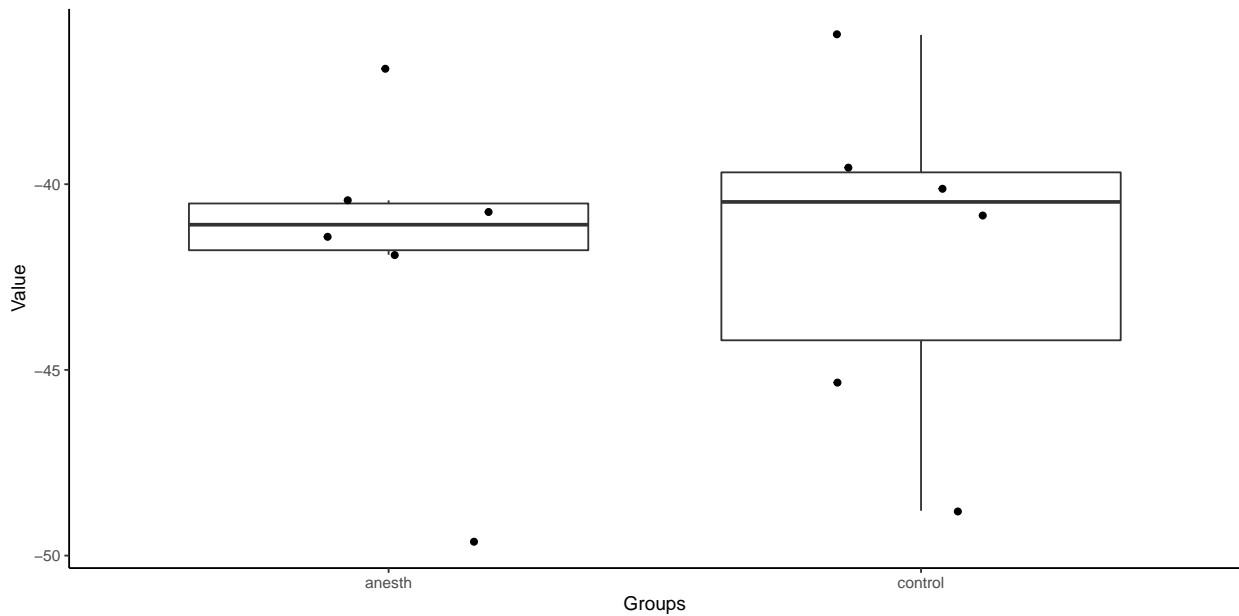

```
## 1. Normality assumption test by Shapiro_Wilk test is  
## p = 0.141  
## Normality assumption was not rejected  
## 2. Equal variance test by Bartlett test is  
## p = 0.864  
## Equal variance assumption was not rejected  
## 3. The result of anova is  
## p = 0.975  
## A statistically significant difference do not exist between groups  
##
```

# Data analysis using R

Boohwi Hong

```
## Present data is ** Suppl_Fig9.C_Input Res_Female.csv **
##
## ** Data structure **
## 'data.frame':  12 obs. of  3 variables:
## $ subject  : int  1 2 3 4 5 6 7 8 9 10 ...
## $ group    : chr  "control" "control" "control" "control" ...
## $ Input.Res: num  183 190 202 270 338 ...
##
## ** Explorative data analysis with graphics**
```

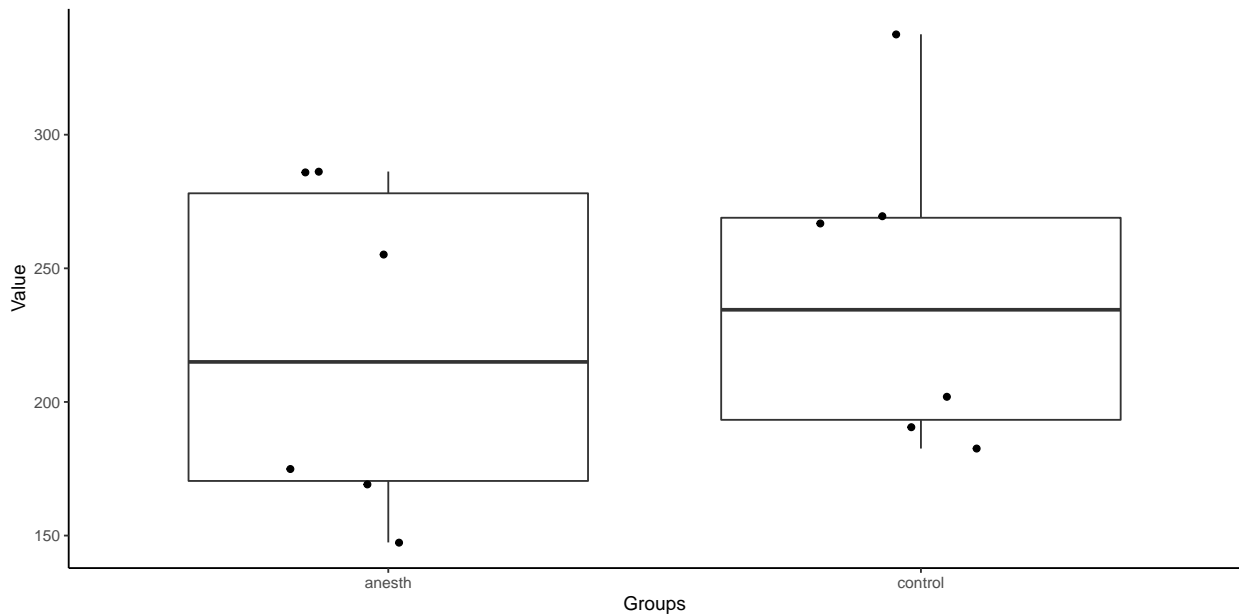

```
## 1. Normality assumption test by Shapiro_Wilk test is
## p = 0.102
## Normality assumption was not rejected
## 2. Equal variance test by Bartlett test is
## p = 0.931
## Equal variance assumption was not rejected
## 3. The result of anova is
## p = 0.555
## A statistically significant difference do not exist between groups
##
```

# Supplementary Note 15

The results of statistical analysis  
for Supplementary Figure 10



# Data analysis using R

Boohwi Hong

```
## Present data is ** Suppl_Fig10.B_mEPSC_amp_female.csv **  
##  
## ** Data structure **  
## 'data.frame': 15 obs. of 3 variables:  
## $ subject: int 1 2 3 4 5 6 7 8 9 10 ...  
## $ group : chr "control" "control" "control" "control" ...  
## $ amp : num 37.1 29.9 17.5 22.4 39.4 ...  
##  
## ** Explorative data analysis with graphics**
```

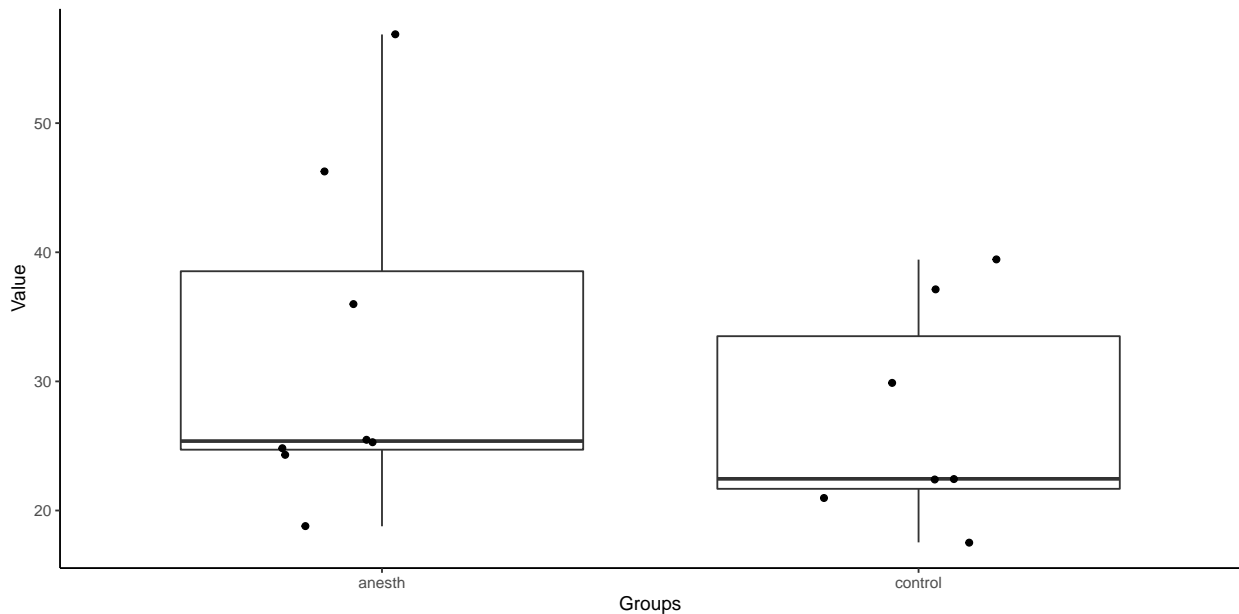

```
## 1. Normality assumption test by Shapiro_Wilk test is  
## p = 0.052  
## Normality assumption was not rejected  
## 2. Equal variance test by Bartlett test is  
## p = 0.298  
## Equal variance assumption was not rejected  
## 3. The result of anova is  
## p = 0.396  
## A statistically significant difference do not exist between groups  
##
```

# Data analysis using R

Boohwi Hong

```
## Present data is ** Suppl_Fig10.B_mEPSC_freq_female.csv **  
##  
## ** Data structure **  
## 'data.frame': 15 obs. of 3 variables:  
## $ subject: int 1 2 3 4 5 6 7 8 9 10 ...  
## $ group : chr "control" "control" "control" "control" ...  
## $ freq : num 0.00417 0.00833 0.025 0.04167 0.04167 ...  
##  
## ** Explorative data analysis with graphics**
```

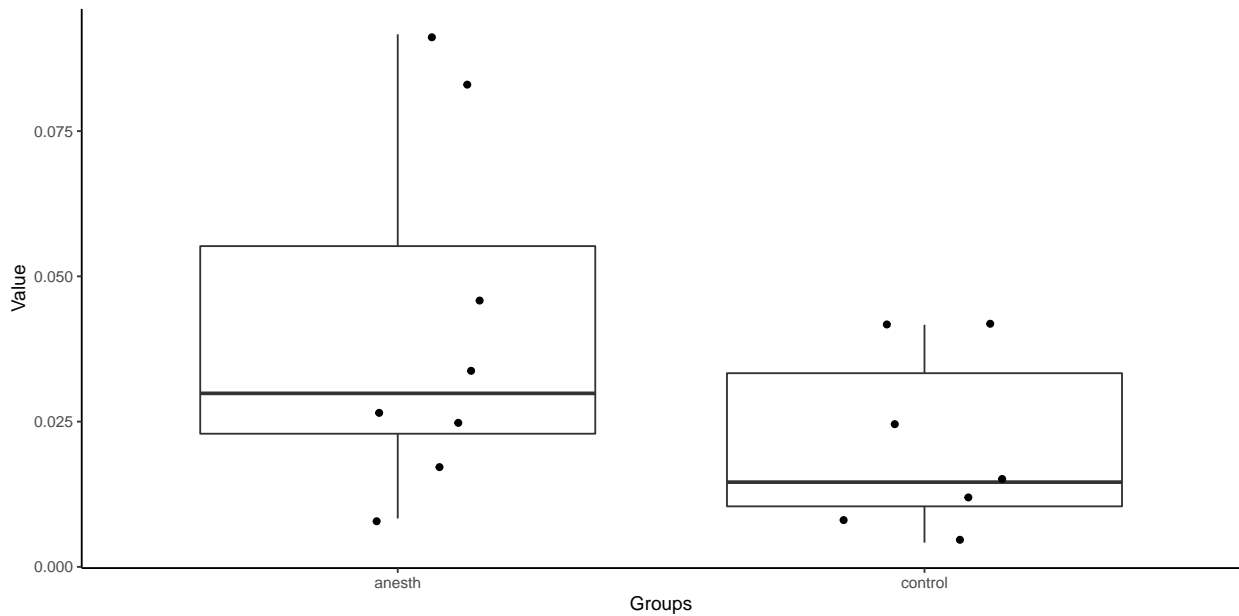

```
## 1. Normality assumption test by Shapiro_Wilk test is  
## p = 0.149  
## Normality assumption was not rejected  
## 2. Equal variance test by Bartlett test is  
## p = 0.111  
## Equal variance assumption was not rejected  
## 3. The result of anova is  
## p = 0.140  
## A statistically significant difference do not exist between groups  
##
```

# Data analysis using R

Boohwi Hong

```
## Present data is ** Suppl_Fig10.D_mIPSC_amp_female.csv **  
##  
## ** Data structure **  
## 'data.frame': 14 obs. of 3 variables:  
## $ subject: int 1 2 3 4 5 6 7 8 9 10 ...  
## $ group : chr "control" "control" "control" "control" ...  
## $ amp : num 38.6 27.2 34 27.4 41.2 ...  
##  
## ** Explorative data analysis with graphics**
```

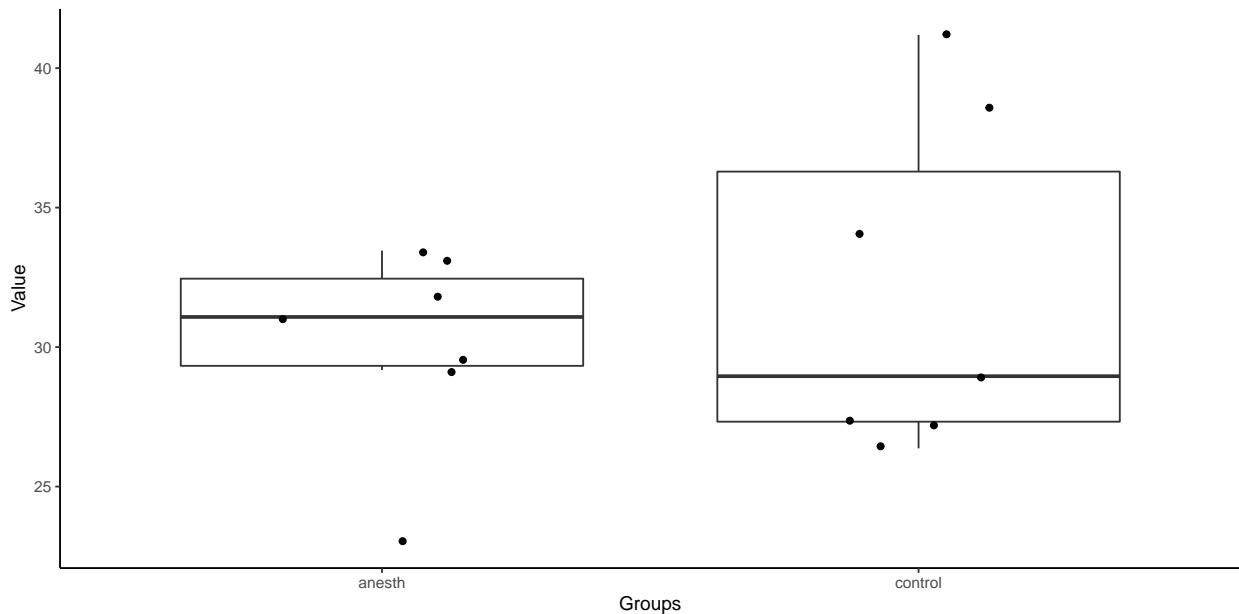

```
## 1. Normality assumption test by Shapiro_Wilk test is  
## p = 0.874  
## Normality assumption was not rejected  
## 2. Equal variance test by Bartlett test is  
## p = 0.227  
## Equal variance assumption was not rejected  
## 3. The result of anova is  
## p = 0.506  
## A statistically significant difference do not exist between groups  
##
```

# Data analysis using R

Boohwi Hong

```
## Present data is ** Suppl_Fig10.D_mIPSC_freq_female.csv **
##
## ** Data structure **
## 'data.frame':  14 obs. of  3 variables:
## $ subject: int  1 2 3 4 5 6 7 8 9 10 ...
## $ group  : chr  "control" "control" "control" "control" ...
## $ freq   : num  12.7 12 14.4 11.2 13.6 ...
##
## ** Explorative data analysis with graphics**
```

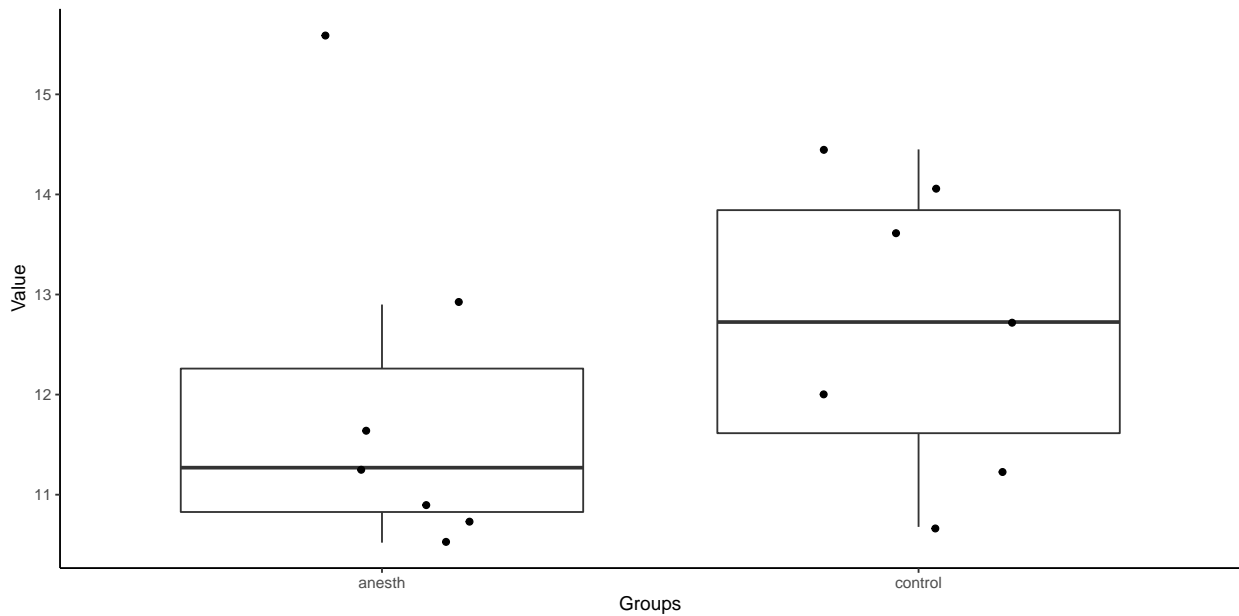

```
## 1. Normality assumption test by Shapiro_Wilk test is
## p = 0.254
## Normality assumption was not rejected
## 2. Equal variance test by Bartlett test is
## p = 0.611
## Equal variance assumption was not rejected
## 3. The result of anova is
## p = 0.410
## A statistically significant difference do not exist between groups
##
```
