# Supplementary material for: Repeated ketamine anesthesia during neurodevelopment upregulates hippocampal activity and enhances drug reward in male mice
Source: PubMed Central journal article supplement (PMC9287305; doi:10.1038/s42003-022-03667-4), 2022-07-15
Supplement: 42003_2022_3667_MOESM3_ESM.pdf [file 42003_2022_3667_MOESM3_ESM.pdf]

## Description of Additional Supplementary Files

**File name:** Supplementary Data 1

**Description:** Functional enrichment analysis of DEGs: Gene ontological term (GO) Biological Process

**File name:** Supplementary Data 2

**Description:** The source data behind the graphs in the paper
